# Supplementary material for: Targeting Oncogenic Wnt/β-Catenin Signaling in Adrenocortical Carcinoma Disrupts ECM Expression and Impairs Tumor Growth
Source: MDPI journal article supplement (doi:10.3390/cancers15143559), 2023-07-10
Supplement: s1 [file s1]

# Full unedited gel imaged in two channels

## Bands outlined in red are shown in Figure 3C

700 Channel: Activated  $\beta$ -Catenin (94kDa) and  $\beta$ -actin (42 kDa)

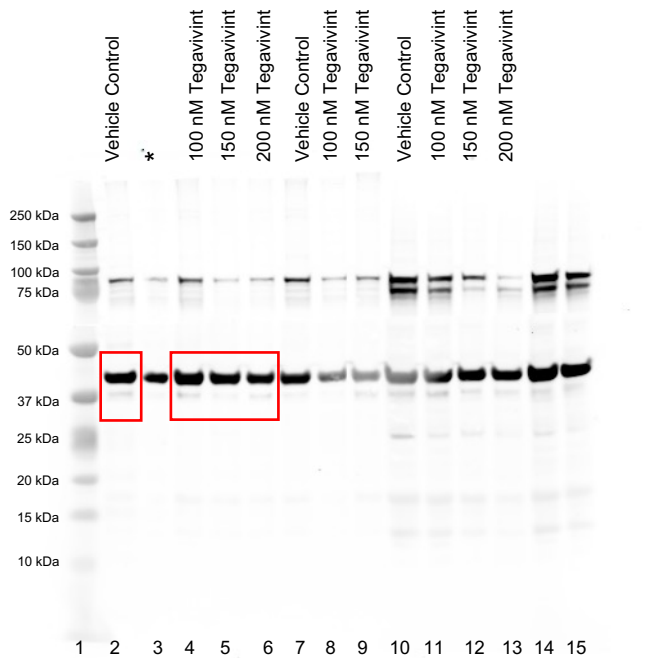

800 Channel: pan- $\beta$ -catenin (94 kDa)

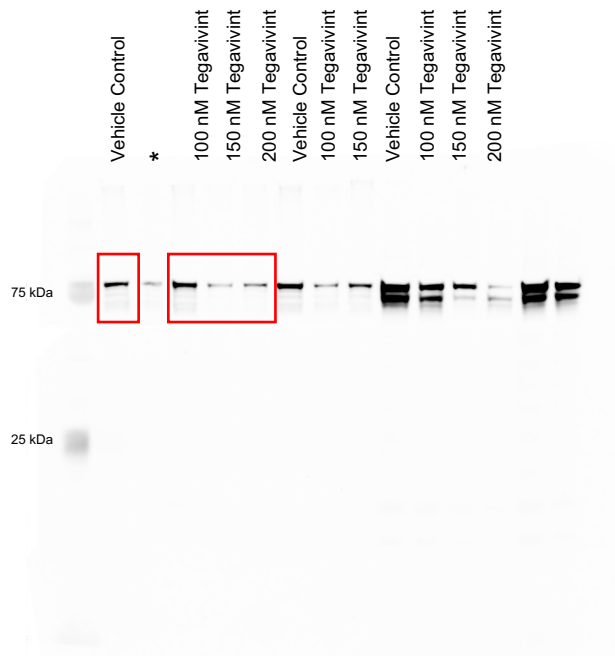

The membrane was probed with antibodies against pan- $\beta$ -catenin (ThermoFisher Scientific MA1-2001, 1:1000), or  $\beta$ -actin (Sigma-Aldrich A-5441, 1:5000).

Rows 2-9 were extracted with RIPA; Rows 10-15 are biologic replicates extracted with a nuclear lysis protocol

\* Row 3 was misloaded and therefore skipped

# Full unedited gel imaged in two channels

Active  $\beta$ -catenin (94 kDa)

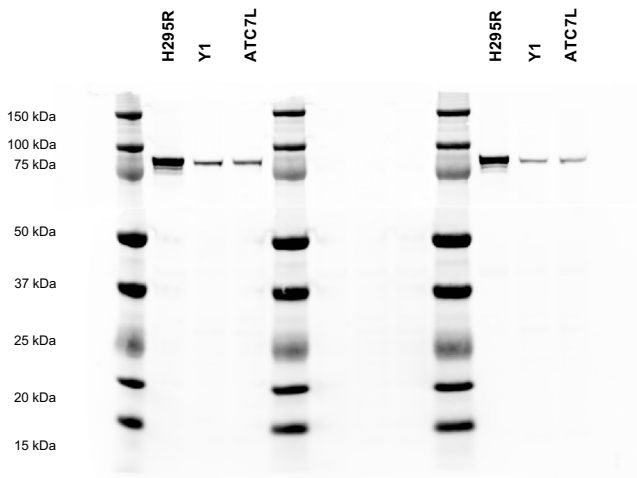

$\beta$ -Catenin (94kDa) and  $\beta$ -actin (42 kDa)

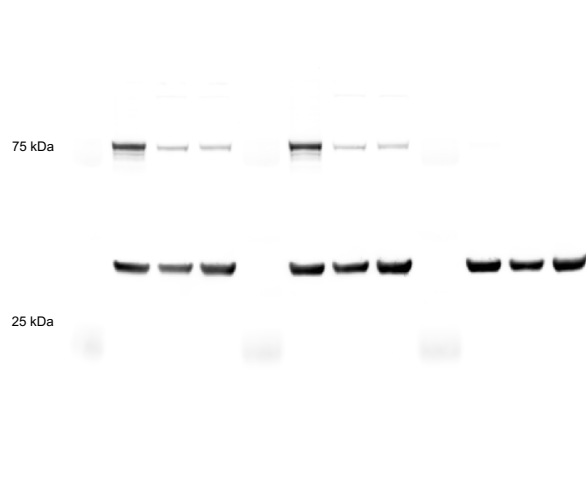

The left and right thirds of the membrane were probed with antibodies against Active  $\beta$ -Catenin (Cell Signaling #9561, 1:1500). The left and center thirds of the membrane were probed with antibodies against  $\beta$ -catenin (ThermoFisher Scientific MA1-2001, 1:1000). The bottom half of the membrane was probed with antibodies against  $\beta$ -actin (Sigma-Aldrich A-5441, 1:5000).

All protein lysates were extracted with RIPA
