# Supplementary material for: Targeting Oncogenic Wnt/β-Catenin Signaling in Adrenocortical Carcinoma Disrupts ECM Expression and Impairs Tumor Growth
Source: MDPI journal article supplement (doi:10.3390/cancers15143559), 2023-07-10
Supplement: s1 [file s1]

**Supplementary Table S2 - Oligonucleotides used in this study**

| Gene           | Forward Primer 5' -> 3' | Reverse Primer 5' -> 3'   |
|----------------|-------------------------|---------------------------|
| <i>HPRT1</i>   | TGACACTGGCAAAACAATGCA   | GGTCCTTTTCACCAGCAAGCT     |
| <i>AXIN2</i>   | AAGTGCAAACCTTTGCGCAAC   | ACAGGATCGCTCCTCTTGAA      |
| <i>LEF1</i>    | CTTTATCCAGGCTGGTCTGC    | TCGTTTTCCACCATGTTTCA      |
| <i>APCDD1</i>  | ATGCCACCCAGAGGATGTTC    | GATGGTCAGGTCTGCCTTTG      |
| <i>COL11A1</i> | GACTATCCCCTCTTCAGAACTG  | CTTCTATCAAGTGGTTTCGTGGTTT |
| <i>COL26A1</i> | CAGCAGCTGAGAGAGGCCCT    | GCCACCCCTCTTCATCTTGAG     |
| <i>ITAG2</i>   | AACTCTTTGGATTTGCGTGTG   | TGGCAGTCTCAGAATAGGCTTC    |
| <i>LAMC3</i>   | GCTCCGAGGAATGCACGTT     | TGTCATCGCACTGGAGGTGTA     |
