# Supplementary material for: Targeting Oncogenic Wnt/β-Catenin Signaling in Adrenocortical Carcinoma Disrupts ECM Expression and Impairs Tumor Growth
Source: MDPI journal article supplement (doi:10.3390/cancers15143559), 2023-07-10
Supplement: s1 [file s1]

Supplementary Table S1 - Component genes with annotations

| Gene Symbol | Description                                                                                          | Scaled projection |
|-------------|------------------------------------------------------------------------------------------------------|-------------------|
| ISM1        | isthmin 1 [Source:HGNC Symbol;Acc:HGNC:16213]                                                        | 10.25453533       |
| COL11A1     | collagen type XI alpha 1 chain [Source:HGNC Symbol;Acc:HGNC:2186]                                    | 9.802373369       |
| CCN3        | cellular communication network factor 3 [Source:HGNC Symbol;Acc:HGNC:7885]                           | 9.716146941       |
| CALN1       | calneuron 1 [Source:HGNC Symbol;Acc:HGNC:13248]                                                      | 9.403110747       |
| LGR5        | leucine rich repeat containing G protein-coupled receptor 5 [Source:HGNC Symbol;Acc:HGNC:4504]       | 9.303881267       |
| PCP4        | Purkinje cell protein 4 [Source:HGNC Symbol;Acc:HGNC:8742]                                           | 9.276320281       |
| WNT4        | Wnt family member 4 [Source:HGNC Symbol;Acc:HGNC:12783]                                              | 8.532097107       |
| SHOC1       | shortage in chiasmata 1 [Source:HGNC Symbol;Acc:HGNC:26535]                                          | 8.420806275       |
| TAF4        | TAF4 chemokine like family member 4 [Source:HGNC Symbol;Acc:HGNC:21591]                              | 8.149245337       |
| COL26A1     | collagen type XXVI alpha 1 chain [Source:HGNC Symbol;Acc:HGNC:18038]                                 | 8.077315887       |
| KCNJ5       | potassium inwardly rectifying channel subfamily J member 5 [Source:HGNC Symbol;Acc:HGNC:6266]        | 8.039007822       |
| RELN        | reelin [Source:HGNC Symbol;Acc:HGNC:9957]                                                            | 7.991226893       |
| CDH2        | cadherin 2 [Source:HGNC Symbol;Acc:HGNC:1759]                                                        | 7.984328405       |
| NKD1        | NKD inhibitor of WNT signaling pathway 1 [Source:HGNC Symbol;Acc:HGNC:17045]                         | 7.895376799       |
| NTM         | neurotrophin [Source:HGNC Symbol;Acc:HGNC:17941]                                                     | 7.678873775       |
| SOWAHB      | soosondowah ankyrin repeat domain family member B [Source:HGNC Symbol;Acc:HGNC:32958]                | 7.60993014        |
| ASTN1       | astrotactin 1 [Source:HGNC Symbol;Acc:HGNC:773]                                                      | 7.45411774        |
| RORB        | RAR related orphan receptor B [Source:HGNC Symbol;Acc:HGNC:10259]                                    | 7.359353752       |
| ATP2B3      | ATPase plasma membrane Ca2+ transporting 3 [Source:HGNC Symbol;Acc:HGNC:816]                         | 7.078249987       |
| TNFRSF19    | TNF receptor superfamily member 19 [Source:HGNC Symbol;Acc:HGNC:11915]                               | 7.016826873       |
| NEFM        | neurofilament medium [Source:HGNC Symbol;Acc:HGNC:7734]                                              | 6.810567501       |
| AARD        | alanine and arginine rich domain containing protein [Source:HGNC Symbol;Acc:HGNC:33842]              | 6.698896914       |
| TCF7        | transcription factor 7 [Source:HGNC Symbol;Acc:HGNC:11639]                                           | 6.649692213       |
| LEF1        | lymphoid enhancer binding factor 1 [Source:HGNC Symbol;Acc:HGNC:6551]                                | 6.630420206       |
| CDO1        | cysteine dioxygenase type 1 [Source:HGNC Symbol;Acc:HGNC:1795]                                       | 6.617185366       |
| ZCCHC12     | zinc finger CCHC-type containing 12 [Source:HGNC Symbol;Acc:HGNC:27273]                              | 6.59691251        |
| COLGALT2    | collagen beta(1-O)galactosyltransferase 2 [Source:HGNC Symbol;Acc:HGNC:16790]                        | 6.59538864        |
| PDE2A       | phosphodiesterase 2A [Source:HGNC Symbol;Acc:HGNC:8777]                                              | 6.538300715       |
| GABBR2      | gamma-aminobutyric acid type B receptor subunit 2 [Source:HGNC Symbol;Acc:HGNC:4507]                 | 6.506367306       |
| SPOCK1      | SPARC (osteonectin), cwcv and kazal like domains, proteoglycan 1 [Source:HGNC Symbol;Acc:HGNC:11251] | 6.50347894        |
| ABCB4       | ATP binding cassette subfamily B member 4 [Source:HGNC Symbol;Acc:HGNC:45]                           | 6.358889849       |
| PDZRN3      | PDZ domain containing ring finger 3 [Source:HGNC Symbol;Acc:HGNC:17704]                              | 6.186865086       |
| KCNK2       | potassium two pore domain channel subfamily K member 2 [Source:HGNC Symbol;Acc:HGNC:6277]            | 6.05458958        |
| NEFL        | neurofilament light [Source:HGNC Symbol;Acc:HGNC:7739]                                               | 5.895359702       |
| ZNF711      | zinc finger protein 711 [Source:HGNC Symbol;Acc:HGNC:13128]                                          | 5.87694365        |
| CGNL1       | cingulin like 1 [Source:HGNC Symbol;Acc:HGNC:25931]                                                  | 5.848014451       |
| ADGRB1      | adhesion G protein-coupled receptor B1 [Source:HGNC Symbol;Acc:HGNC:943]                             | 5.844645113       |
| FGF12       | fibroblast growth factor 12 [Source:HGNC Symbol;Acc:HGNC:3668]                                       | 5.809819869       |
| AFF3        | AF4/FMR2 family member 3 [Source:HGNC Symbol;Acc:HGNC:6473]                                          | 5.768957296       |
| APCDD1      | APC down-regulated 1 [Source:HGNC Symbol;Acc:HGNC:15718]                                             | 5.689692616       |
| GSTT2B      | glutathione S-transferase theta 2B (gene/pseudogene) [Source:HGNC Symbol;Acc:HGNC:33437]             | 5.671025201       |
| ASB4        | ankyrin repeat and SOCS box containing 4 [Source:HGNC Symbol;Acc:HGNC:16009]                         | 5.669144084       |
| RNF43       | ring finger protein 43 [Source:HGNC Symbol;Acc:HGNC:18505]                                           | 5.612902675       |
| SV2A        | synaptic vesicle glycoprotein 2A [Source:HGNC Symbol;Acc:HGNC:20566]                                 | 5.585744766       |
| QPCT        | glutamyl-peptide cyclotransferase [Source:HGNC Symbol;Acc:HGNC:9753]                                 | 5.548522975       |
| CABP7       | calcium binding protein 7 [Source:HGNC Symbol;Acc:HGNC:20834]                                        | 5.541183823       |
| LPAR1       | lysophosphatidic acid receptor 1 [Source:HGNC Symbol;Acc:HGNC:3166]                                  | 5.536118104       |
| BMP4        | bone morphogenetic protein 4 [Source:HGNC Symbol;Acc:HGNC:1071]                                      | 5.459519786       |
| SLC44A5     | solute carrier family 44 member 5 [Source:HGNC Symbol;Acc:HGNC:28524]                                | 5.458577842       |
| VPREB3      | V-set pre-B cell surrogate light chain 3 [Source:HGNC Symbol;Acc:HGNC:12710]                         | 5.424329851       |
| LINC01537   | long intergenic non-protein coding RNA 1537 [Source:HGNC Symbol;Acc:HGNC:51301]                      | 5.414016888       |
| FRRS1L      | ferric chelate reductase 1 like [Source:HGNC Symbol;Acc:HGNC:1362]                                   | 5.381643283       |
| FAM169A     | family with sequence similarity 169 member A [Source:HGNC Symbol;Acc:HGNC:29138]                     | 5.317024586       |
| RHBDL3      | rhomoid like 3 [Source:HGNC Symbol;Acc:HGNC:16502]                                                   | 5.310985156       |
| FAM181B     | family with sequence similarity 181 member B [Source:HGNC Symbol;Acc:HGNC:28512]                     | 5.293014763       |
| MOXD1       | monooxygenase DBH like 1 [Source:HGNC Symbol;Acc:HGNC:21063]                                         | 5.209185512       |
| HLF         | HLF transcription factor, PAR bZIP family member [Source:HGNC Symbol;Acc:HGNC:4977]                  | 5.178293379       |
| TMEM200A    | transmembrane protein 200A [Source:HGNC Symbol;Acc:HGNC:21075]                                       | 5.101061906       |
| NSG1        | neuronal vesicle trafficking associated 1 [Source:HGNC Symbol;Acc:HGNC:18790]                        | 5.09706116        |
| BRINP2      | BMP/retinoic acid inducible neural specific 2 [Source:HGNC Symbol;Acc:HGNC:13746]                    | 5.072275714       |
| SLIT2       | slit guidance ligand 2 [Source:HGNC Symbol;Acc:HGNC:11086]                                           | 5.056855805       |
| PLD5        | phospholipase D family member 5 [Source:HGNC Symbol;Acc:HGNC:26879]                                  | 5.019127523       |
| SLC30A10    | solute carrier family 30 member 10 [Source:HGNC Symbol;Acc:HGNC:25355]                               | 5.018258917       |
| DACH1       | dachshund family transcription factor 1 [Source:HGNC Symbol;Acc:HGNC:2663]                           | 4.959632174       |
| PXYLP1      | 2-phosphoxylose phosphatase 1 [Source:HGNC Symbol;Acc:HGNC:26303]                                    | 4.929205423       |
| CCDC170     | coiled-coil domain containing 170 [Source:HGNC Symbol;Acc:HGNC:21177]                                | 4.910118206       |
| NRXN2       | neurexin 2 [Source:HGNC Symbol;Acc:HGNC:8009]                                                        | 4.896016603       |
| MCOLN3      | mucolipin 3 [Source:HGNC Symbol;Acc:HGNC:13358]                                                      | 4.855148667       |
| DCN         | decorin [Source:HGNC Symbol;Acc:HGNC:2705]                                                           | 4.845055415       |
| RASL10B     | RAS like family 10 member B [Source:HGNC Symbol;Acc:HGNC:30295]                                      | 4.829112611       |
| LSAMP       | limbic system associated membrane protein [Source:HGNC Symbol;Acc:HGNC:6705]                         | 4.802146372       |
| TMEM200C    | transmembrane protein 200C [Source:HGNC Symbol;Acc:HGNC:37208]                                       | 4.79889476        |
| TNFSF4      | TNF superfamily member 4 [Source:HGNC Symbol;Acc:HGNC:1934]                                          | 4.742475031       |
| LINC02593   | long intergenic non-protein coding RNA 2593 [Source:HGNC Symbol;Acc:HGNC:53933]                      | 4.683832798       |
| P3H3        | prolyl 3-hydroxylase 3 [Source:HGNC Symbol;Acc:HGNC:19318]                                           | 4.675995953       |
| AXIN2       | axin 2 [Source:HGNC Symbol;Acc:HGNC:904]                                                             | 4.632330498       |
| TUBBP5      | tubulin beta pseudogene 5 [Source:HGNC Symbol;Acc:HGNC:23674]                                        | 4.60989891        |
| VCAN        | versican [Source:HGNC Symbol;Acc:HGNC:2464]                                                          | 4.575078298       |
| HOXB9       | homeobox B9 [Source:HGNC Symbol;Acc:HGNC:5120]                                                       | 4.567042128       |
| SYTL2       | synaptotagmin like 2 [Source:HGNC Symbol;Acc:HGNC:15585]                                             | 4.564036553       |
| AF106564.1  | novel transcript, antisense to NEFM                                                                  | 4.554082311       |
| ETV4        | ETS variant transcription factor 4 [Source:HGNC Symbol;Acc:HGNC:3493]                                | 4.551940006       |
| SHROOM3     | shroom family member 3 [Source:HGNC Symbol;Acc:HGNC:30422]                                           | 4.550764173       |
| UGCG        | UDP-glucose ceramide glucosyltransferase [Source:HGNC Symbol;Acc:HGNC:12524]                         | 4.542428054       |

|            |                                                                                                                 |             |
|------------|-----------------------------------------------------------------------------------------------------------------|-------------|
| ABCD2      | ATP binding cassette subfamily D member 2 [Source:HGNC Symbol;Acc:HGNC:66]                                      | 4.536893537 |
| TSPAN8     | tetraspanin 8 [Source:HGNC Symbol;Acc:HGNC:11855]                                                               | 4.487478615 |
| AC010501.2 | novel transcript, antisense to FAM169A                                                                          | 4.471136683 |
| ESRRG      | estrogen related receptor gamma [Source:HGNC Symbol;Acc:HGNC:3474]                                              | 4.469525251 |
| IGSF5      | immunoglobulin superfamily member 5 [Source:HGNC Symbol;Acc:HGNC:5952]                                          | 4.462607159 |
| UBE2QL1    | ubiquitin conjugating enzyme E2 Q family like 1 [Source:HGNC Symbol;Acc:HGNC:37269]                             | 4.449074519 |
| MYH7B      | myosin heavy chain 7B [Source:HGNC Symbol;Acc:HGNC:15906]                                                       | 4.44096187  |
| ANO4       | anoctamin 4 [Source:HGNC Symbol;Acc:HGNC:23837]                                                                 | 4.428175052 |
| DPP10      | dipeptidyl peptidase like 10 [Source:HGNC Symbol;Acc:HGNC:20823]                                                | 4.427363781 |
| SLC2A4     | solute carrier family 2 member 4 [Source:HGNC Symbol;Acc:HGNC:11009]                                            | 4.419777962 |
| AGTR1      | angiotensin II receptor type 1 [Source:HGNC Symbol;Acc:HGNC:336]                                                | 4.393545171 |
| HSD3B2     | hydroxy-delta-5-steroid dehydrogenase, 3 beta- and steroid delta-isomerase 2 [Source:HGNC Symbol;Acc:HGNC:5218] | 4.392446998 |
| FAM135B    | family with sequence similarity 135 member B [Source:HGNC Symbol;Acc:HGNC:28029]                                | 4.383886367 |
| CACNA2D1   | calcium voltage-gated channel auxiliary subunit alpha2delta 1 [Source:HGNC Symbol;Acc:HGNC:1399]                | 4.334354048 |
| ATP10A     | ATPase phospholipid transporting 10A (putative) [Source:HGNC Symbol;Acc:HGNC:13542]                             | 4.319443586 |
| PGM5       | phosphoglucomutase 5 [Source:HGNC Symbol;Acc:HGNC:8908]                                                         | 4.307692919 |
| ECEL1      | endothelin converting enzyme like 1 [Source:HGNC Symbol;Acc:HGNC:3147]                                          | 4.297255605 |
| PEG10      | paternally expressed 10 [Source:HGNC Symbol;Acc:HGNC:14005]                                                     | 4.296466029 |
| PTPN7      | protein tyrosine phosphatase non-receptor type 7 [Source:HGNC Symbol;Acc:HGNC:9659]                             | 4.295422386 |
| MERTK      | MER proto-oncogene, tyrosine kinase [Source:HGNC Symbol;Acc:HGNC:7027]                                          | 4.262026588 |
| GOLGA7B    | golgin A7 family member B [Source:HGNC Symbol;Acc:HGNC:31668]                                                   | 4.252937006 |
| MCF2       | MCF.2 cell line derived transforming sequence [Source:HGNC Symbol;Acc:HGNC:6940]                                | 4.230788237 |
| SP5        | Sp5 transcription factor [Source:HGNC Symbol;Acc:HGNC:14529]                                                    | 4.221925611 |
| CERS1      | ceramide synthase 1 [Source:HGNC Symbol;Acc:HGNC:14253]                                                         | 4.212903723 |
| ASGR1      | asialoglycoprotein receptor 1 [Source:HGNC Symbol;Acc:HGNC:742]                                                 | 4.211422587 |
| VGf        | VGf nerve growth factor inducible [Source:HGNC Symbol;Acc:HGNC:12684]                                           | 4.1992842   |
| LRCH2      | leucine rich repeats and calponin homology domain containing 2 [Source:HGNC Symbol;Acc:HGNC:29292]              | 4.176965999 |
| CADM1      | cell adhesion molecule 1 [Source:HGNC Symbol;Acc:HGNC:5951]                                                     | 4.156518994 |
| ST6GALNAC5 | ST6 N-acetylgalactosaminide alpha-2,6-sialyltransferase 5 [Source:HGNC Symbol;Acc:HGNC:19342]                   | 4.151804052 |
| RIMS2      | regulating synaptic membrane exocytosis 2 [Source:HGNC Symbol;Acc:HGNC:17283]                                   | 4.116882656 |
| DKK3       | dickkopf WNT signaling pathway inhibitor 3 [Source:HGNC Symbol;Acc:HGNC:2893]                                   | 4.103093305 |
| FGF20      | fibroblast growth factor 20 [Source:HGNC Symbol;Acc:HGNC:3677]                                                  | 4.101910938 |
| FST        | folistatin [Source:HGNC Symbol;Acc:HGNC:3971]                                                                   | 4.090806076 |
| CHRD       | chordin [Source:HGNC Symbol;Acc:HGNC:1949]                                                                      | 4.072099984 |
| ABR        | ABR activator of RhoGEF and GTPase [Source:HGNC Symbol;Acc:HGNC:81]                                             | 4.056074785 |
| ACOX2      | acyl-CoA oxidase 2 [Source:HGNC Symbol;Acc:HGNC:120]                                                            | 4.049839956 |
| CPB1       | carboxypeptidase B1 [Source:HGNC Symbol;Acc:HGNC:2299]                                                          | 4.037100922 |
| PLXNB3     | plexin B3 [Source:HGNC Symbol;Acc:HGNC:9105]                                                                    | 4.023695457 |
| TGFB2      | transforming growth factor beta 2 [Source:HGNC Symbol;Acc:HGNC:11768]                                           | 3.980640371 |
| SLC35F3    | solute carrier family 35 member F3 [Source:HGNC Symbol;Acc:HGNC:23616]                                          | 3.958342152 |
| GPR162     | G protein-coupled receptor 162 [Source:HGNC Symbol;Acc:HGNC:16693]                                              | 3.953060734 |
| PLCL2      | phospholipase C like 2 [Source:HGNC Symbol;Acc:HGNC:9064]                                                       | 3.938734613 |
| KIF7       | kinesin family member 7 [Source:HGNC Symbol;Acc:HGNC:30497]                                                     | 3.911199003 |
| WNK2       | WNK lysine deficient protein kinase 2 [Source:HGNC Symbol;Acc:HGNC:14542]                                       | 3.893686613 |
| GFAP       | glial fibrillary acidic protein [Source:HGNC Symbol;Acc:HGNC:4235]                                              | 3.87159479  |
| SAMD11     | sterile alpha motif domain containing 11 [Source:HGNC Symbol;Acc:HGNC:28706]                                    | 3.849088641 |
| BANK1      | B cell scaffold protein with ankyrin repeats 1 [Source:HGNC Symbol;Acc:HGNC:18233]                              | 3.846041724 |
| PNMA3      | PNMA family member 3 [Source:HGNC Symbol;Acc:HGNC:18742]                                                        | 3.831059626 |
| RPRM       | reprimin, TP53 dependent G2 arrest mediator homolog [Source:HGNC Symbol;Acc:HGNC:24201]                         | 3.789072273 |
| TPBG       | trophoblast glycoprotein [Source:HGNC Symbol;Acc:HGNC:12004]                                                    | 3.778716539 |
| RAB38      | RAB38, member RAS oncogene family [Source:HGNC Symbol;Acc:HGNC:9776]                                            | 3.770348774 |
| LINC01116  | long intergenic non-protein coding RNA 1116 [Source:HGNC Symbol;Acc:HGNC:49259]                                 | 3.763372135 |
| UNC5C      | unc-5 netrin receptor C [Source:HGNC Symbol;Acc:HGNC:12569]                                                     | 3.750190385 |
| LG13       | leucine rich repeat LG1 family member 3 [Source:HGNC Symbol;Acc:HGNC:18711]                                     | 3.74534925  |
| ADAMTSL1   | ADAMTSL like 1 [Source:HGNC Symbol;Acc:HGNC:14632]                                                              | 3.740056394 |
| AC078880.3 | novel transcript                                                                                                | 3.735796463 |
| FUT1       | fucosyltransferase 1 (H blood group) [Source:HGNC Symbol;Acc:HGNC:4012]                                         | 3.729352252 |
| SLC12A8    | solute carrier family 12 member 8 [Source:HGNC Symbol;Acc:HGNC:15595]                                           | 3.720634686 |
| SLC22A3    | solute carrier family 22 member 3 [Source:HGNC Symbol;Acc:HGNC:10967]                                           | 3.714524786 |
| TMEM132E   | transmembrane protein 132E [Source:HGNC Symbol;Acc:HGNC:26991]                                                  | 3.712154848 |
| STEAP2     | STEAP2 metalloenductase [Source:HGNC Symbol;Acc:HGNC:17885]                                                     | 3.65402769  |
| CILP2      | cartilage intermediate layer protein 2 [Source:HGNC Symbol;Acc:HGNC:24213]                                      | 3.630187221 |
| KRT222     | keratin 222 [Source:HGNC Symbol;Acc:HGNC:28695]                                                                 | 3.629239963 |
| DAB2       | DAB adaptor protein 2 [Source:HGNC Symbol;Acc:HGNC:2662]                                                        | 3.594604088 |
| ALDH1L1    | aldehyde dehydrogenase 1 family member L1 [Source:HGNC Symbol;Acc:HGNC:3978]                                    | 3.592053801 |
| MIR100HG   | mir-100-let-7a-2-mir-125b-1 cluster host gene [Source:HGNC Symbol;Acc:HGNC:39522]                               | 3.584244266 |
| NFATC4     | nuclear factor of activated T cells 4 [Source:HGNC Symbol;Acc:HGNC:7778]                                        | 3.57075142  |
| HMGGA2     | high mobility group AT-hook 2 [Source:HGNC Symbol;Acc:HGNC:5009]                                                | 3.563448456 |
| BICC1      | Bicc1 family RNA binding protein 1 [Source:HGNC Symbol;Acc:HGNC:19351]                                          | 3.548432437 |
| LAMC3      | laminin subunit gamma 3 [Source:HGNC Symbol;Acc:HGNC:6494]                                                      | 3.547045299 |
| SCARA3     | scavenger receptor class A member 3 [Source:HGNC Symbol;Acc:HGNC:19000]                                         | 3.527053799 |
| ACSL6      | acyl-CoA synthetase long chain family member 6 [Source:HGNC Symbol;Acc:HGNC:16496]                              | 3.517165875 |
| ARHGEF4    | Rho guanine nucleotide exchange factor 4 [Source:HGNC Symbol;Acc:HGNC:684]                                      | 3.515762991 |
| KCNN2      | potassium calcium-activated channel subfamily N member 2 [Source:HGNC Symbol;Acc:HGNC:6291]                     | 3.513912991 |
| ITGA2      | integrin subunit alpha 2 [Source:HGNC Symbol;Acc:HGNC:6137]                                                     | 3.505574929 |
| UBXN10     | UBX domain protein 10 [Source:HGNC Symbol;Acc:HGNC:26354]                                                       | 3.494935718 |
| AC103702.2 | novel transcript                                                                                                | 3.491879705 |
| MDK        | midkine [Source:HGNC Symbol;Acc:HGNC:6972]                                                                      | 3.482139837 |
| IFITM10    | interferon induced transmembrane protein 10 [Source:HGNC Symbol;Acc:HGNC:40022]                                 | 3.472838116 |
| ADAM22     | ADAM metalloproteinase domain 22 [Source:HGNC Symbol;Acc:HGNC:201]                                              | 3.470823364 |
| MC2R       | melanocortin 2 receptor [Source:HGNC Symbol;Acc:HGNC:6930]                                                      | 3.447979403 |
| FAM171B    | family with sequence similarity 171 member B [Source:HGNC Symbol;Acc:HGNC:29412]                                | 3.432070929 |
| ALDH1A2    | aldehyde dehydrogenase 1 family member A2 [Source:HGNC Symbol;Acc:HGNC:15472]                                   | 3.429471745 |
| NAGS       | N-acetylglutamate synthase [Source:HGNC Symbol;Acc:HGNC:17996]                                                  | 3.407611634 |
| RUNX1T1    | RUNX1 partner transcriptional co-repressor 1 [Source:HGNC Symbol;Acc:HGNC:1535]                                 | 3.402333968 |
| MAP7D2     | MAP7 domain containing 2 [Source:HGNC Symbol;Acc:HGNC:25899]                                                    | 3.398586024 |
| CA11       | carbonic anhydrase 11 [Source:HGNC Symbol;Acc:HGNC:1370]                                                        | 3.396472239 |

|            |                                                                                                        |             |
|------------|--------------------------------------------------------------------------------------------------------|-------------|
| AL136962.1 | long intergenic non-protein coding RNA 540                                                             | 3.396089218 |
| BDNF       | brain derived neurotrophic factor [Source:HGNC Symbol;Acc:HGNC:1033]                                   | 3.384810998 |
| SLC4A8     | solute carrier family 4 member 8 [Source:HGNC Symbol;Acc:HGNC:11034]                                   | 3.353501372 |
| NR4A3      | nuclear receptor subfamily 4 group A member 3 [Source:HGNC Symbol;Acc:HGNC:7982]                       | 3.33717232  |
| RASAL1     | RAS protein activator like 1 [Source:HGNC Symbol;Acc:HGNC:9873]                                        | 3.320189605 |
| KHDRBS3    | KH RNA binding domain containing, signal transduction associated 3 [Source:HGNC Symbol;Acc:HGNC:18117] | 3.317878872 |
| SV2B       | synaptic vesicle glycoprotein 2B [Source:HGNC Symbol;Acc:HGNC:16874]                                   | 3.317564987 |
| CCDC73     | coiled-coil domain containing 73 [Source:HGNC Symbol;Acc:HGNC:23261]                                   | 3.317311829 |
| LRATD1     | LRAT domain containing 1 [Source:HGNC Symbol;Acc:HGNC:20743]                                           | 3.315679757 |
| TMEM221    | transmembrane protein 221 [Source:HGNC Symbol;Acc:HGNC:21943]                                          | 3.30986353  |
| TMEM108    | transmembrane protein 108 [Source:HGNC Symbol;Acc:HGNC:28451]                                          | 3.300685496 |
| CIB4       | calcium and integrin binding family member 4 [Source:HGNC Symbol;Acc:HGNC:33703]                       | 3.299349753 |
| SPON1      | spondin 1 [Source:HGNC Symbol;Acc:HGNC:11252]                                                          | 3.294723614 |
| LARP6      | La ribonucleoprotein 6, translational regulator [Source:HGNC Symbol;Acc:HGNC:24012]                    | 3.288374352 |
| GATA3      | GATA binding protein 3 [Source:HGNC Symbol;Acc:HGNC:4172]                                              | 3.287684882 |
| PRRX1      | paired related homeobox 1 [Source:HGNC Symbol;Acc:HGNC:9142]                                           | 3.285112702 |
| NPTX1      | neuronal pentraxin 1 [Source:HGNC Symbol;Acc:HGNC:7952]                                                | 3.28505917  |
| LRRN2      | leucine rich repeat neuronal 2 [Source:HGNC Symbol;Acc:HGNC:16914]                                     | 3.28457696  |
| SRPX       | sushi repeat containing protein X-linked [Source:HGNC Symbol;Acc:HGNC:11309]                           | 3.277388925 |
| CSRP2      | cysteine and glycine rich protein 2 [Source:HGNC Symbol;Acc:HGNC:2470]                                 | 3.273936181 |
| TMEM25     | transmembrane protein 25 [Source:HGNC Symbol;Acc:HGNC:25890]                                           | 3.26230189  |
| WNT3       | Wnt family member 3 [Source:HGNC Symbol;Acc:HGNC:12782]                                                | 3.246275036 |
| SLC22A17   | solute carrier family 22 member 17 [Source:HGNC Symbol;Acc:HGNC:23095]                                 | 3.238583129 |
| INPP4B     | inositol polyphosphate-4-phosphatase type II B [Source:HGNC Symbol;Acc:HGNC:6075]                      | 3.232259969 |
| CTHRC1     | collagen triple helix repeat containing 1 [Source:HGNC Symbol;Acc:HGNC:18831]                          | 3.22589785  |
| PHLDA1     | pleckstrin homology like domain family A member 1 [Source:HGNC Symbol;Acc:HGNC:8933]                   | 3.221197075 |
| CCDC184    | coiled-coil domain containing 184 [Source:HGNC Symbol;Acc:HGNC:33749]                                  | 3.219094254 |
| PRKD3      | protein kinase D3 [Source:HGNC Symbol;Acc:HGNC:9408]                                                   | 3.206893556 |
| C11orf45   | chromosome 11 open reading frame 45 [Source:HGNC Symbol;Acc:HGNC:28584]                                | 3.206810226 |
| ETV5       | ETS variant transcription factor 5 [Source:HGNC Symbol;Acc:HGNC:3494]                                  | 3.195045095 |
| RTN4R      | reticulon 4 receptor [Source:HGNC Symbol;Acc:HGNC:18601]                                               | 3.192028782 |
| AATK       | apoptosis associated tyrosine kinase [Source:HGNC Symbol;Acc:HGNC:21]                                  | 3.186210375 |
| PITX1      | paired like homeodomain 1 [Source:HGNC Symbol;Acc:HGNC:9004]                                           | 3.171611441 |
| HYAL1      | hyaluronidase 1 [Source:HGNC Symbol;Acc:HGNC:5320]                                                     | 3.16421807  |
| SLC16A2    | solute carrier family 16 member 2 [Source:HGNC Symbol;Acc:HGNC:10923]                                  | 3.160515269 |
| SLC6A9     | solute carrier family 6 member 9 [Source:HGNC Symbol;Acc:HGNC:11056]                                   | 3.158840236 |
| AMOT       | angiomotin [Source:HGNC Symbol;Acc:HGNC:17810]                                                         | 3.134783393 |
| PLPP2      | phospholipid phosphatase 2 [Source:HGNC Symbol;Acc:HGNC:9230]                                          | 3.133352954 |
| CD5        | CD5 molecule [Source:HGNC Symbol;Acc:HGNC:1685]                                                        | 3.129506173 |
| EML6       | EMAP like 6 [Source:HGNC Symbol;Acc:HGNC:35412]                                                        | 3.120340354 |
| PRSS35     | serine protease 35 [Source:HGNC Symbol;Acc:HGNC:21387]                                                 | 3.119982662 |
| JAM2       | junctional adhesion molecule 2 [Source:HGNC Symbol;Acc:HGNC:14686]                                     | 3.119235943 |
| HS3ST3B1   | heparan sulfate-glucosamine 3-sulfotransferase 3B1 [Source:HGNC Symbol;Acc:HGNC:5198]                  | 3.118166615 |
| COL4A3     | collagen type IV alpha 3 chain [Source:HGNC Symbol;Acc:HGNC:2204]                                      | 3.106153221 |
| ATP2A3     | ATPase sarcoplasmic/endoplasmic reticulum Ca2+ transporting 3 [Source:HGNC Symbol;Acc:HGNC:813]        | 3.102200845 |
| CACNB4     | calcium voltage-gated channel auxiliary subunit beta 4 [Source:HGNC Symbol;Acc:HGNC:1404]              | 3.10134349  |
| TNFSF13B   | TNF superfamily member 13b [Source:HGNC Symbol;Acc:HGNC:11929]                                         | 3.083959251 |
| NANOGP1    | Nanoq homeobox pseudogene 1 [Source:HGNC Symbol;Acc:HGNC:23099]                                        | 3.083422748 |
| NFASC      | neurofascin [Source:HGNC Symbol;Acc:HGNC:29866]                                                        | 3.082066784 |
| SLC47A1    | solute carrier family 47 member 1 [Source:HGNC Symbol;Acc:HGNC:25588]                                  | 3.073437312 |
| ELOVL4     | ELOVL fatty acid elongase 4 [Source:HGNC Symbol;Acc:HGNC:14415]                                        | 3.07185023  |
| VSTM4      | V-set and transmembrane domain containing 4 [Source:HGNC Symbol;Acc:HGNC:26470]                        | 3.071838635 |
| SMO        | smoothened, frizzled class receptor [Source:HGNC Symbol;Acc:HGNC:11119]                                | 3.065417985 |
| ALCAM      | activated leukocyte cell adhesion molecule [Source:HGNC Symbol;Acc:HGNC:400]                           | 3.058330556 |
| SEMA3C     | semaphorin 3C [Source:HGNC Symbol;Acc:HGNC:10725]                                                      | 3.057838153 |
| UNC79      | unc-79 homolog, NALCN channel complex subunit [Source:HGNC Symbol;Acc:HGNC:19966]                      | 3.054916859 |
| CRABP2     | cellular retinoic acid binding protein 2 [Source:HGNC Symbol;Acc:HGNC:2339]                            | 3.034048234 |
| JPH2       | junctophilin 2 [Source:HGNC Symbol;Acc:HGNC:14202]                                                     | 3.028099555 |
| SERINC5    | serine incorporator 5 [Source:HGNC Symbol;Acc:HGNC:18825]                                              | 3.026909224 |
| SORBS2     | sorbin and SH3 domain containing 2 [Source:HGNC Symbol;Acc:HGNC:24098]                                 | 3.022167142 |
| RARG       | retinoic acid receptor gamma [Source:HGNC Symbol;Acc:HGNC:9866]                                        | 3.021829035 |
| PLEKHF1    | pleckstrin homology and FYVE domain containing 1 [Source:HGNC Symbol;Acc:HGNC:20764]                   | 3.010582397 |
| ATP1B2     | ATPase Na+/K+ transporting subunit beta 2 [Source:HGNC Symbol;Acc:HGNC:805]                            | 3.0084944   |
| CCND1      | cyclin D1 [Source:HGNC Symbol;Acc:HGNC:1582]                                                           | 3.008442635 |
| CLGN       | calmegin [Source:HGNC Symbol;Acc:HGNC:2060]                                                            | 3.006082526 |
| FAM149A    | family with sequence similarity 149 member A [Source:HGNC Symbol;Acc:HGNC:24527]                       | 2.99852404  |
| RGS14      | regulator of G protein signaling 14 [Source:HGNC Symbol;Acc:HGNC:9996]                                 | 2.991397068 |
| DAAM2      | dishevelled associated activator of morphogenesis 2 [Source:HGNC Symbol;Acc:HGNC:18143]                | 2.971777151 |
| GNAL       | G protein subunit alpha L [Source:HGNC Symbol;Acc:HGNC:4388]                                           | 2.970271031 |
| LINC01616  | long intergenic non-protein coding RNA 1616 [Source:HGNC Symbol;Acc:HGNC:51900]                        | 2.970084543 |
| HEPH       | hephaestin [Source:HGNC Symbol;Acc:HGNC:4866]                                                          | 2.969040974 |
| PDE5A      | phosphodiesterase 5A [Source:HGNC Symbol;Acc:HGNC:8784]                                                | 2.967107414 |
| SYTL5      | synaptotagmin like 5 [Source:HGNC Symbol;Acc:HGNC:15589]                                               | 2.96007372  |
| FAM110B    | family with sequence similarity 110 member B [Source:HGNC Symbol;Acc:HGNC:28587]                       | 2.957861462 |
| SBSPON     | somatomedin B and thrombospondin type 1 domain containing [Source:HGNC Symbol;Acc:HGNC:30362]          | 2.95093422  |
| CAPN5      | calpain 5 [Source:HGNC Symbol;Acc:HGNC:1482]                                                           | 2.94979603  |
| INSYN1     | inhibitory synaptic factor 1 [Source:HGNC Symbol;Acc:HGNC:33753]                                       | 2.942737258 |
| HR         | HR lysine demethylase and nuclear receptor corepressor [Source:HGNC Symbol;Acc:HGNC:5172]              | 2.937932427 |
| CACNB2     | calcium voltage-gated channel auxiliary subunit beta 2 [Source:HGNC Symbol;Acc:HGNC:1402]              | 2.932973065 |
| KREMEN2    | kringle containing transmembrane protein 2 [Source:HGNC Symbol;Acc:HGNC:18797]                         | 2.931015877 |
| AL049838.1 | novel transcript, overlapping C14orf37                                                                 | 2.930122604 |
| RAET1G     | retinoic acid early transcript 1G [Source:HGNC Symbol;Acc:HGNC:16795]                                  | 2.926386489 |
| EFNA5      | ephrin A5 [Source:HGNC Symbol;Acc:HGNC:3225]                                                           | 2.925287463 |
| RBPMS2     | RNA binding protein, mRNA processing factor 2 [Source:HGNC Symbol;Acc:HGNC:19098]                      | 2.922238417 |
| PPM1E      | protein phosphatase, Mg2+/Mn2+ dependent 1E [Source:HGNC Symbol;Acc:HGNC:19322]                        | 2.916762301 |
| PNMA6A     | PNMA family member 6A [Source:HGNC Symbol;Acc:HGNC:28248]                                              | 2.912594662 |
| RNF217     | ring finger protein 217 [Source:HGNC Symbol;Acc:HGNC:21487]                                            | 2.912358413 |

|             |                                                                                                              |             |
|-------------|--------------------------------------------------------------------------------------------------------------|-------------|
| ADGRD1      | adhesion G protein-coupled receptor D1 [Source:HGNC Symbol;Acc:HGNC:19893]                                   | 2.91111432  |
| FAM110C     | family with sequence similarity 110 member C [Source:HGNC Symbol;Acc:HGNC:33340]                             | 2.910322624 |
| NPNT        | nephronectin [Source:HGNC Symbol;Acc:HGNC:27405]                                                             | 2.908321711 |
| ERN1        | endoplasmic reticulum to nucleus signaling 1 [Source:HGNC Symbol;Acc:HGNC:3449]                              | 2.894596079 |
| ISLR2       | immunoglobulin superfamily containing leucine rich repeat 2 [Source:HGNC Symbol;Acc:HGNC:29286]              | 2.88638995  |
| GPR61       | G protein-coupled receptor 61 [Source:HGNC Symbol;Acc:HGNC:13300]                                            | 2.881038169 |
| PYGO1       | pygopus family PHD finger 1 [Source:HGNC Symbol;Acc:HGNC:30256]                                              | 2.861441215 |
| MAPK8IP2    | mitogen-activated protein kinase 8 interacting protein 2 [Source:HGNC Symbol;Acc:HGNC:6883]                  | 2.855893038 |
| CLDN1       | claudin 1 [Source:HGNC Symbol;Acc:HGNC:2032]                                                                 | 2.850060981 |
| DTX1        | deltex E3 ubiquitin ligase 1 [Source:HGNC Symbol;Acc:HGNC:3060]                                              | 2.845273518 |
| MINAR1      | membrane integral NOTCH2 associated receptor 1 [Source:HGNC Symbol;Acc:HGNC:29172]                           | 2.845027326 |
| NUDT11      | nudix hydrolase 11 [Source:HGNC Symbol;Acc:HGNC:18011]                                                       | 2.844089949 |
| RAB39B      | RAB39B, member RAS oncogene family [Source:HGNC Symbol;Acc:HGNC:16499]                                       | 2.843534296 |
| MFAP4       | microfibril associated protein 4 [Source:HGNC Symbol;Acc:HGNC:7035]                                          | 2.840046095 |
| KIF5A       | kinesin family member 5A [Source:HGNC Symbol;Acc:HGNC:6323]                                                  | 2.834656663 |
| LY75        | lymphocyte antigen 75 [Source:HGNC Symbol;Acc:HGNC:6729]                                                     | 2.834630388 |
| ADH1B       | alcohol dehydrogenase 1B (class I), beta polypeptide [Source:HGNC Symbol;Acc:HGNC:250]                       | 2.834502458 |
| GPRC5C      | G protein-coupled receptor class C group 5 member C [Source:HGNC Symbol;Acc:HGNC:13309]                      | 2.825424834 |
| ACAN        | aggrecan [Source:HGNC Symbol;Acc:HGNC:319]                                                                   | 2.823532019 |
| EVC         | Evc ciliary complex subunit 1 [Source:HGNC Symbol;Acc:HGNC:3497]                                             | 2.82351937  |
| KAZN        | kazrin, periplakin interacting protein [Source:HGNC Symbol;Acc:HGNC:29173]                                   | 2.815047916 |
| FBXL7       | F-box and leucine rich repeat protein 7 [Source:HGNC Symbol;Acc:HGNC:13604]                                  | 2.814332582 |
| GRB14       | growth factor receptor bound protein 14 [Source:HGNC Symbol;Acc:HGNC:4565]                                   | 2.813400405 |
| PRR7        | proline rich 7, synaptic [Source:HGNC Symbol;Acc:HGNC:28130]                                                 | 2.805984642 |
| ATL1        | atlastin GTPase 1 [Source:HGNC Symbol;Acc:HGNC:11231]                                                        | 2.794223373 |
| CYP11B2     | cytochrome P450 family 11 subfamily B member 2 [Source:HGNC Symbol;Acc:HGNC:2592]                            | 2.79125585  |
| ADAMTS9-AS2 | ADAMTS9 antisense RNA 2 [Source:HGNC Symbol;Acc:HGNC:42435]                                                  | 2.789765117 |
| AC079949.2  | novel transcript                                                                                             | 2.787696091 |
| KCNG1       | potassium voltage-gated channel modifier subfamily G member 1 [Source:HGNC Symbol;Acc:HGNC:6248]             | 2.786856296 |
| DNM3        | dynamitin 3 [Source:HGNC Symbol;Acc:HGNC:29125]                                                              | 2.785794748 |
| SDK2        | sidekick cell adhesion molecule 2 [Source:HGNC Symbol;Acc:HGNC:19308]                                        | 2.784231286 |
| PARVB       | parvin beta [Source:HGNC Symbol;Acc:HGNC:14653]                                                              | 2.783173456 |
| ARG2        | arginase 2 [Source:HGNC Symbol;Acc:HGNC:664]                                                                 | 2.767962118 |
| RHBG        | Rh family B glycoprotein (gene/pseudogene) [Source:HGNC Symbol;Acc:HGNC:14572]                               | 2.763854586 |
| ATRNL1      | atractin like 1 [Source:HGNC Symbol;Acc:HGNC:29063]                                                          | 2.755066664 |
| PTGIS       | prostaglandin I2 synthase [Source:HGNC Symbol;Acc:HGNC:9603]                                                 | 2.754263671 |
| OPRL1       | opioid related nociceptin receptor 1 [Source:HGNC Symbol;Acc:HGNC:8155]                                      | 2.747288338 |
| LUM         | lumican [Source:HGNC Symbol;Acc:HGNC:6724]                                                                   | 2.744567441 |
| HOXB8       | homeobox B8 [Source:HGNC Symbol;Acc:HGNC:5119]                                                               | 2.741731147 |
| SPTLC3      | serine palmitoyltransferase long chain base subunit 3 [Source:HGNC Symbol;Acc:HGNC:16253]                    | 2.740615962 |
| LAMA2       | laminin subunit alpha 2 [Source:HGNC Symbol;Acc:HGNC:6482]                                                   | 2.740560949 |
| ASIC1       | acid sensing ion channel subunit 1 [Source:HGNC Symbol;Acc:HGNC:100]                                         | 2.736871448 |
| SRCIN1      | SRC kinase signaling inhibitor 1 [Source:HGNC Symbol;Acc:HGNC:29506]                                         | 2.736467056 |
| EFNA3       | ephrin A3 [Source:HGNC Symbol;Acc:HGNC:3223]                                                                 | 2.736027496 |
| HSH2D       | hematopoietic SH2 domain containing [Source:HGNC Symbol;Acc:HGNC:24920]                                      | 2.734715163 |
| ID2         | inhibitor of DNA binding 2 [Source:HGNC Symbol;Acc:HGNC:5361]                                                | 2.731855701 |
| AC005052.1  | TEC                                                                                                          | 2.722565114 |
| SLC44A4     | solute carrier family 44 member 4 [Source:HGNC Symbol;Acc:HGNC:13941]                                        | 2.715167874 |
| ETV1        | ETS variant transcription factor 1 [Source:HGNC Symbol;Acc:HGNC:3490]                                        | 2.710317151 |
| PKD4        | pyruvate dehydrogenase kinase 4 [Source:HGNC Symbol;Acc:HGNC:8812]                                           | 2.708258219 |
| TWSG1       | twisted gastrulation BMP signaling modulator 1 [Source:HGNC Symbol;Acc:HGNC:12429]                           | 2.699430046 |
| CDHR1       | cadherin related family member 1 [Source:HGNC Symbol;Acc:HGNC:14550]                                         | 2.699269044 |
| LRRC17      | leucine rich repeat containing 17 [Source:HGNC Symbol;Acc:HGNC:16895]                                        | 2.689449039 |
| IZUMO1      | izumo sperm-egg fusion 1 [Source:HGNC Symbol;Acc:HGNC:28539]                                                 | 2.676580183 |
| GPC4        | glypican 4 [Source:HGNC Symbol;Acc:HGNC:4452]                                                                | 2.673322808 |
| WDFY3-AS2   | WDFY3 antisense RNA 2 [Source:HGNC Symbol;Acc:HGNC:21603]                                                    | 2.650891431 |
| B3GNT9      | UDP-GlcNAc:betaGal beta-1,3-N-acetylglucosaminyltransferase 9 [Source:HGNC Symbol;Acc:HGNC:28714]            | 2.642132894 |
| LSP1        | lymphocyte specific protein 1 [Source:HGNC Symbol;Acc:HGNC:6707]                                             | 2.64000361  |
| KLHDC8A     | kelch domain containing 8A [Source:HGNC Symbol;Acc:HGNC:25573]                                               | 2.634699537 |
| IGHG1       | immunoglobulin heavy constant gamma 1 (G1m marker) [Source:HGNC Symbol;Acc:HGNC:5525]                        | 2.63395816  |
| RNF128      | ring finger protein 128 [Source:HGNC Symbol;Acc:HGNC:21153]                                                  | 2.608304983 |
| RPSAP70     | ribosomal protein SA pseudogene 70 [Source:HGNC Symbol;Acc:HGNC:51923]                                       | 2.602362289 |
| AL139220.2  | novel transcript                                                                                             | 2.596280539 |
| SEMA4G      | semaphorin 4G [Source:HGNC Symbol;Acc:HGNC:10735]                                                            | 2.585604789 |
| RASGEF1A    | RasGEF domain family member 1A [Source:HGNC Symbol;Acc:HGNC:24246]                                           | 2.581225911 |
| FLRT2       | fibronectin leucine rich transmembrane protein 2 [Source:HGNC Symbol;Acc:HGNC:3761]                          | 2.563045696 |
| SESN3       | sestrin 3 [Source:HGNC Symbol;Acc:HGNC:23060]                                                                | 2.558442689 |
| KCNMB4      | potassium calcium-activated channel subfamily M regulatory beta subunit 4 [Source:HGNC Symbol;Acc:HGNC:6289] | 2.539602592 |
| ERN2        | endoplasmic reticulum to nucleus signaling 2 [Source:HGNC Symbol;Acc:HGNC:16942]                             | 2.537724229 |
| TEC         | tec protein tyrosine kinase [Source:HGNC Symbol;Acc:HGNC:11719]                                              | 2.535657547 |
| WDR63       | WD repeat domain 63 [Source:HGNC Symbol;Acc:HGNC:30711]                                                      | 2.530274604 |
| MAP6        | microtubule associated protein 6 [Source:HGNC Symbol;Acc:HGNC:6868]                                          | 2.528510817 |
| PRICKLE1    | prickle planar cell polarity protein 1 [Source:HGNC Symbol;Acc:HGNC:17019]                                   | 2.528169594 |
| THNSL2      | threonine synthase like 2 [Source:HGNC Symbol;Acc:HGNC:25602]                                                | 2.525314287 |
| IGKC        | immunoglobulin kappa constant [Source:HGNC Symbol;Acc:HGNC:5716]                                             | 2.523864896 |
| PCDHGB4     | protocadherin gamma subfamily B, 4 [Source:HGNC Symbol;Acc:HGNC:8711]                                        | 2.514632776 |
| LIN7A       | lin-7 homolog A, crumbs cell polarity complex component [Source:HGNC Symbol;Acc:HGNC:17787]                  | 2.513009823 |
| CDK6        | cyclin dependent kinase 6 [Source:HGNC Symbol;Acc:HGNC:1777]                                                 | 2.506890234 |
| MYO5B       | myosin VB [Source:HGNC Symbol;Acc:HGNC:7603]                                                                 | 2.50618462  |
| HS3ST1      | heparan sulfate-glucosamine 3-sulfotransferase 1 [Source:HGNC Symbol;Acc:HGNC:5194]                          | 2.503288908 |
| SSPO        | SCO-spondin [Source:HGNC Symbol;Acc:HGNC:21998]                                                              | 2.500558646 |
