# Supplementary material for: Targeting Oncogenic Wnt/β-Catenin Signaling in Adrenocortical Carcinoma Disrupts ECM Expression and Impairs Tumor Growth
Source: Cancers (Basel). 2023 Jul 10;15(14):3559. doi: 10.3390/cancers15143559 (PMC10377252; doi:10.3390/cancers15143559)
Supplement: Supplementary file 1 [file cancers-15-03559-s001.zip]

Archive with 8 entries (8 files):
- Cancers Supplementary Figure S1 - Revisions.pdf
- Cancers Supplementary Figure S2 Revisions.pdf
- Cancers Supplementary Figure S3 Revisions.pdf
- Cancers Supplementary Figure S4 - Revisions.pdf
- Supplementary Table S1a - Component genes with annotations copy.pdf
- Supplementary Table S1b - gene lists.xls
- Supplementary Table S2 - Oligonucleotides used in this study.pdf
- Western Blots - File S1.pdf
