# Supplementary material for: Targeting Oncogenic Wnt/β-Catenin Signaling in Adrenocortical Carcinoma Disrupts ECM Expression and Impairs Tumor Growth
Source: Cancers (Basel). 2023 Jul 10;15(14):3559. doi: 10.3390/cancers15143559 (PMC10377252; doi:10.3390/cancers15143559)
Supplement: Supplementary file 1 [file cancers-15-03559-s001.zip › Supplementary Table S1b - gene lists.xls]

## Sheet: WNT_component
Gene_Symbol	Description	Scaled_projection
ISM1	isthmin 1 [Source:HGNC Symbol;Acc:HGNC:16213]	10.2545
COL11A1	collagen type XI alpha 1 chain [Source:HGNC Symbol;Acc:HGNC:2186]	9.80237
CCN3	cellular communication network factor 3 [Source:HGNC Symbol;Acc:HGNC:7885]	9.71615
CALN1	calneuron 1 [Source:HGNC Symbol;Acc:HGNC:13248]	9.40311
LGR5	leucine rich repeat containing G protein-coupled receptor 5 [Source:HGNC Symbol;Acc:HGNC:4504]	9.30388
PCP4	Purkinje cell protein 4 [Source:HGNC Symbol;Acc:HGNC:8742]	9.27632
WNT4	Wnt family member 4 [Source:HGNC Symbol;Acc:HGNC:12783]	8.5321
SHOC1	shortage in chiasmata 1 [Source:HGNC Symbol;Acc:HGNC:26535]	8.42081
TAFA4	TAFA chemokine like family member 4 [Source:HGNC Symbol;Acc:HGNC:21591]	8.14925
COL26A1	collagen type XXVI alpha 1 chain [Source:HGNC Symbol;Acc:HGNC:18038]	8.07732
KCNJ5	potassium inwardly rectifying channel subfamily J member 5 [Source:HGNC Symbol;Acc:HGNC:6266]	8.03901
RELN	reelin [Source:HGNC Symbol;Acc:HGNC:9957]	7.99123
CDH2	cadherin 2 [Source:HGNC Symbol;Acc:HGNC:1759]	7.98433
NKD1	NKD inhibitor of WNT signaling pathway 1 [Source:HGNC Symbol;Acc:HGNC:17045]	7.89538
NTM	neurotrimin [Source:HGNC Symbol;Acc:HGNC:17941]	7.67887
SOWAHB	sosondowah ankyrin repeat domain family member B [Source:HGNC Symbol;Acc:HGNC:32958]	7.60993
ASTN1	astrotactin 1 [Source:HGNC Symbol;Acc:HGNC:773]	7.45412
RORB	RAR related orphan receptor B [Source:HGNC Symbol;Acc:HGNC:10259]	7.35935
ATP2B3	ATPase plasma membrane Ca2+ transporting 3 [Source:HGNC Symbol;Acc:HGNC:816]	7.07825
TNFRSF19	TNF receptor superfamily member 19 [Source:HGNC Symbol;Acc:HGNC:11915]	7.01683
NEFM	neurofilament medium [Source:HGNC Symbol;Acc:HGNC:7734]	6.81057
AARD	alanine and arginine rich domain containing protein [Source:HGNC Symbol;Acc:HGNC:33842]	6.6989
TCF7	transcription factor 7 [Source:HGNC Symbol;Acc:HGNC:11639]	6.64969
LEF1	lymphoid enhancer binding factor 1 [Source:HGNC Symbol;Acc:HGNC:6551]	6.63042
CDO1	cysteine dioxygenase type 1 [Source:HGNC Symbol;Acc:HGNC:1795]	6.61719
ZCCHC12	zinc finger CCHC-type containing 12 [Source:HGNC Symbol;Acc:HGNC:27273]	6.59691
COLGALT2	collagen beta(1-O)galactosyltransferase 2 [Source:HGNC Symbol;Acc:HGNC:16790]	6.59539
PDE2A	phosphodiesterase 2A [Source:HGNC Symbol;Acc:HGNC:8777]	6.5383
GABBR2	gamma-aminobutyric acid type B receptor subunit 2 [Source:HGNC Symbol;Acc:HGNC:4507]	6.50637
SPOCK1	SPARC (osteonectin), cwcv and kazal like domains proteoglycan 1 [Source:HGNC Symbol;Acc:HGNC:11251]	6.50348
ABCB4	ATP binding cassette subfamily B member 4 [Source:HGNC Symbol;Acc:HGNC:45]	6.35889
PDZRN3	PDZ domain containing ring finger 3 [Source:HGNC Symbol;Acc:HGNC:17704]	6.18687
KCNK2	potassium two pore domain channel subfamily K member 2 [Source:HGNC Symbol;Acc:HGNC:6277]	6.05459
NEFL	neurofilament light [Source:HGNC Symbol;Acc:HGNC:7739]	5.89536
ZNF711	zinc finger protein 711 [Source:HGNC Symbol;Acc:HGNC:13128]	5.87694
CGNL1	cingulin like 1 [Source:HGNC Symbol;Acc:HGNC:25931]	5.84801
ADGRB1	adhesion G protein-coupled receptor B1 [Source:HGNC Symbol;Acc:HGNC:943]	5.84465
FGF12	fibroblast growth factor 12 [Source:HGNC Symbol;Acc:HGNC:3668]	5.80982
AFF3	AF4/FMR2 family member 3 [Source:HGNC Symbol;Acc:HGNC:6473]	5.76896
APCDD1	APC down-regulated 1 [Source:HGNC Symbol;Acc:HGNC:15718]	5.68969
GSTT2B	glutathione S-transferase theta 2B (gene/pseudogene) [Source:HGNC Symbol;Acc:HGNC:33437]	5.67103
ASB4	ankyrin repeat and SOCS box containing 4 [Source:HGNC Symbol;Acc:HGNC:16009]	5.66914
RNF43	ring finger protein 43 [Source:HGNC Symbol;Acc:HGNC:18505]	5.6129
SV2A	synaptic vesicle glycoprotein 2A [Source:HGNC Symbol;Acc:HGNC:20566]	5.58574
QPCT	glutaminyl-peptide cyclotransferase [Source:HGNC Symbol;Acc:HGNC:9753]	5.54852
CABP7	calcium binding protein 7 [Source:HGNC Symbol;Acc:HGNC:20834]	5.54118
LPAR1	lysophosphatidic acid receptor 1 [Source:HGNC Symbol;Acc:HGNC:3166]	5.53612
BMP4	bone morphogenetic protein 4 [Source:HGNC Symbol;Acc:HGNC:1071]	5.45952
SLC44A5	solute carrier family 44 member 5 [Source:HGNC Symbol;Acc:HGNC:28524]	5.45858
VPREB3	V-set pre-B cell surrogate light chain 3 [Source:HGNC Symbol;Acc:HGNC:12710]	5.42433
LINC01537	long intergenic non-protein coding RNA 1537 [Source:HGNC Symbol;Acc:HGNC:51301]	5.41402
FRRS1L	ferric chelate reductase 1 like [Source:HGNC Symbol;Acc:HGNC:1362]	5.38164
FAM169A	family with sequence similarity 169 member A [Source:HGNC Symbol;Acc:HGNC:29138]	5.31702
RHBDL3	rhomboid like 3 [Source:HGNC Symbol;Acc:HGNC:16502]	5.31099
FAM181B	family with sequence similarity 181 member B [Source:HGNC Symbol;Acc:HGNC:28512]	5.29301
MOXD1	monooxygenase DBH like 1 [Source:HGNC Symbol;Acc:HGNC:21063]	5.20919
HLF	HLF transcription factor, PAR bZIP family member [Source:HGNC Symbol;Acc:HGNC:4977]	5.17829
TMEM200A	transmembrane protein 200A [Source:HGNC Symbol;Acc:HGNC:21075]	5.10106
NSG1	neuronal vesicle trafficking associated 1 [Source:HGNC Symbol;Acc:HGNC:18790]	5.09706
BRINP2	BMP/retinoic acid inducible neural specific 2 [Source:HGNC Symbol;Acc:HGNC:13746]	5.07228
SLIT2	slit guidance ligand 2 [Source:HGNC Symbol;Acc:HGNC:11086]	5.05686
PLD5	phospholipase D family member 5 [Source:HGNC Symbol;Acc:HGNC:26879]	5.01913
SLC30A10	solute carrier family 30 member 10 [Source:HGNC Symbol;Acc:HGNC:25355]	5.01826
DACH1	dachshund family transcription factor 1 [Source:HGNC Symbol;Acc:HGNC:2663]	4.95963
PXYLP1	2-phosphoxylose phosphatase 1 [Source:HGNC Symbol;Acc:HGNC:26303]	4.92921
CCDC170	coiled-coil domain containing 170 [Source:HGNC Symbol;Acc:HGNC:21177]	4.91012
NRXN2	neurexin 2 [Source:HGNC Symbol;Acc:HGNC:8009]	4.89602
MCOLN3	mucolipin 3 [Source:HGNC Symbol;Acc:HGNC:13358]	4.85515
DCN	decorin [Source:HGNC Symbol;Acc:HGNC:2705]	4.84506
RASL10B	RAS like family 10 member B [Source:HGNC Symbol;Acc:HGNC:30295]	4.82911
LSAMP	limbic system associated membrane protein [Source:HGNC Symbol;Acc:HGNC:6705]	4.80215
TMEM200C	transmembrane protein 200C [Source:HGNC Symbol;Acc:HGNC:37208]	4.79889
TNFSF4	TNF superfamily member 4 [Source:HGNC Symbol;Acc:HGNC:11934]	4.74248
LINC02593	long intergenic non-protein coding RNA 2593 [Source:HGNC Symbol;Acc:HGNC:53933]	4.68383
P3H3	prolyl 3-hydroxylase 3 [Source:HGNC Symbol;Acc:HGNC:19318]	4.676
AXIN2	axin 2 [Source:HGNC Symbol;Acc:HGNC:904]	4.63233
TUBBP5	tubulin beta pseudogene 5 [Source:HGNC Symbol;Acc:HGNC:23674]	4.6099
VCAN	versican [Source:HGNC Symbol;Acc:HGNC:2464]	4.57508
HOXB9	homeobox B9 [Source:HGNC Symbol;Acc:HGNC:5120]	4.56704
SYTL2	synaptotagmin like 2 [Source:HGNC Symbol;Acc:HGNC:15585]	4.56404
AF106564.1	novel transcript, antisense to NEFM	4.55408
ETV4	ETS variant transcription factor 4 [Source:HGNC Symbol;Acc:HGNC:3493]	4.55194
SHROOM3	shroom family member 3 [Source:HGNC Symbol;Acc:HGNC:30422]	4.55076
UGCG	UDP-glucose ceramide glucosyltransferase [Source:HGNC Symbol;Acc:HGNC:12524]	4.54243
ABCD2	ATP binding cassette subfamily D member 2 [Source:HGNC Symbol;Acc:HGNC:66]	4.53689
TSPAN8	tetraspanin 8 [Source:HGNC Symbol;Acc:HGNC:11855]	4.48748
AC010501.2	novel transcript, antisense to FAM169A	4.47114
ESRRG	estrogen related receptor gamma [Source:HGNC Symbol;Acc:HGNC:3474]	4.46953
IGSF5	immunoglobulin superfamily member 5 [Source:HGNC Symbol;Acc:HGNC:5952]	4.46261
UBE2QL1	ubiquitin conjugating enzyme E2 Q family like 1 [Source:HGNC Symbol;Acc:HGNC:37269]	4.44907
MYH7B	myosin heavy chain 7B [Source:HGNC Symbol;Acc:HGNC:15906]	4.44096
ANO4	anoctamin 4 [Source:HGNC Symbol;Acc:HGNC:23837]	4.42818
DPP10	dipeptidyl peptidase like 10 [Source:HGNC Symbol;Acc:HGNC:20823]	4.42736
SLC2A4	solute carrier family 2 member 4 [Source:HGNC Symbol;Acc:HGNC:11009]	4.41978
AGTR1	angiotensin II receptor type 1 [Source:HGNC Symbol;Acc:HGNC:336]	4.39355
HSD3B2	hydroxy-delta-5-steroid dehydrogenase, 3 beta- and steroid delta-isomerase 2 [Source:HGNC Symbol;Acc:HGNC:5218]	4.39245
FAM135B	family with sequence similarity 135 member B [Source:HGNC Symbol;Acc:HGNC:28029]	4.38389
CACNA2D1	calcium voltage-gated channel auxiliary subunit alpha2delta 1 [Source:HGNC Symbol;Acc:HGNC:1399]	4.33435
ATP10A	ATPase phospholipid transporting 10A (putative) [Source:HGNC Symbol;Acc:HGNC:13542]	4.31944
PGM5	phosphoglucomutase 5 [Source:HGNC Symbol;Acc:HGNC:8908]	4.30769
ECEL1	endothelin converting enzyme like 1 [Source:HGNC Symbol;Acc:HGNC:3147]	4.29726
PEG10	paternally expressed 10 [Source:HGNC Symbol;Acc:HGNC:14005]	4.29647
PTPN7	protein tyrosine phosphatase non-receptor type 7 [Source:HGNC Symbol;Acc:HGNC:9659]	4.29542
MERTK	MER proto-oncogene, tyrosine kinase [Source:HGNC Symbol;Acc:HGNC:7027]	4.26203
GOLGA7B	golgin A7 family member B [Source:HGNC Symbol;Acc:HGNC:31668]	4.25294
MCF2	MCF.2 cell line derived transforming sequence [Source:HGNC Symbol;Acc:HGNC:6940]	4.23079
SP5	Sp5 transcription factor [Source:HGNC Symbol;Acc:HGNC:14529]	4.22193
CERS1	ceramide synthase 1 [Source:HGNC Symbol;Acc:HGNC:14253]	4.2129
ASGR1	asialoglycoprotein receptor 1 [Source:HGNC Symbol;Acc:HGNC:742]	4.21142
VGF	VGF nerve growth factor inducible [Source:HGNC Symbol;Acc:HGNC:12684]	4.19928
LRCH2	leucine rich repeats and calponin homology domain containing 2 [Source:HGNC Symbol;Acc:HGNC:29292]	4.17697
CADM1	cell adhesion molecule 1 [Source:HGNC Symbol;Acc:HGNC:5951]	4.15652
ST6GALNAC5	ST6 N-acetylgalactosaminide alpha-2,6-sialyltransferase 5 [Source:HGNC Symbol;Acc:HGNC:19342]	4.1518
RIMS2	regulating synaptic membrane exocytosis 2 [Source:HGNC Symbol;Acc:HGNC:17283]	4.11688
DKK3	dickkopf WNT signaling pathway inhibitor 3 [Source:HGNC Symbol;Acc:HGNC:2893]	4.10309
FGF20	fibroblast growth factor 20 [Source:HGNC Symbol;Acc:HGNC:3677]	4.10191
FST	follistatin [Source:HGNC Symbol;Acc:HGNC:3971]	4.09081
CHRD	chordin [Source:HGNC Symbol;Acc:HGNC:1949]	4.0721
ABR	ABR activator of RhoGEF and GTPase [Source:HGNC Symbol;Acc:HGNC:81]	4.05607
ACOX2	acyl-CoA oxidase 2 [Source:HGNC Symbol;Acc:HGNC:120]	4.04984
CPB1	carboxypeptidase B1 [Source:HGNC Symbol;Acc:HGNC:2299]	4.0371
PLXNB3	plexin B3 [Source:HGNC Symbol;Acc:HGNC:9105]	4.0237
TGFB2	transforming growth factor beta 2 [Source:HGNC Symbol;Acc:HGNC:11768]	3.98064
SLC35F3	solute carrier family 35 member F3 [Source:HGNC Symbol;Acc:HGNC:23616]	3.95834
GPR162	G protein-coupled receptor 162 [Source:HGNC Symbol;Acc:HGNC:16693]	3.95306
PLCL2	phospholipase C like 2 [Source:HGNC Symbol;Acc:HGNC:9064]	3.93873
KIF7	kinesin family member 7 [Source:HGNC Symbol;Acc:HGNC:30497]	3.9112
WNK2	WNK lysine deficient protein kinase 2 [Source:HGNC Symbol;Acc:HGNC:14542]	3.89369
GFAP	glial fibrillary acidic protein [Source:HGNC Symbol;Acc:HGNC:4235]	3.87159
SAMD11	sterile alpha motif domain containing 11 [Source:HGNC Symbol;Acc:HGNC:28706]	3.84909
BANK1	B cell scaffold protein with ankyrin repeats 1 [Source:HGNC Symbol;Acc:HGNC:18233]	3.84604
PNMA3	PNMA family member 3 [Source:HGNC Symbol;Acc:HGNC:18742]	3.83106
RPRM	reprimo, TP53 dependent G2 arrest mediator homolog [Source:HGNC Symbol;Acc:HGNC:24201]	3.78907
TPBG	trophoblast glycoprotein [Source:HGNC Symbol;Acc:HGNC:12004]	3.77872
RAB38	RAB38, member RAS oncogene family [Source:HGNC Symbol;Acc:HGNC:9776]	3.77035
LINC01116	long intergenic non-protein coding RNA 1116 [Source:HGNC Symbol;Acc:HGNC:49259]	3.76337
UNC5C	unc-5 netrin receptor C [Source:HGNC Symbol;Acc:HGNC:12569]	3.75019
LGI3	leucine rich repeat LGI family member 3 [Source:HGNC Symbol;Acc:HGNC:18711]	3.74535
ADAMTSL1	ADAMTS like 1 [Source:HGNC Symbol;Acc:HGNC:14632]	3.74006
AC078880.3	novel transcript	3.7358
FUT1	fucosyltransferase 1 (H blood group) [Source:HGNC Symbol;Acc:HGNC:4012]	3.72935
SLC12A8	solute carrier family 12 member 8 [Source:HGNC Symbol;Acc:HGNC:15595]	3.72063
SLC22A3	solute carrier family 22 member 3 [Source:HGNC Symbol;Acc:HGNC:10967]	3.71452
TMEM132E	transmembrane protein 132E [Source:HGNC Symbol;Acc:HGNC:26991]	3.71215
STEAP2	STEAP2 metalloreductase [Source:HGNC Symbol;Acc:HGNC:17885]	3.65403
CILP2	cartilage intermediate layer protein 2 [Source:HGNC Symbol;Acc:HGNC:24213]	3.63019
KRT222	keratin 222 [Source:HGNC Symbol;Acc:HGNC:28695]	3.62924
DAB2	DAB adaptor protein 2 [Source:HGNC Symbol;Acc:HGNC:2662]	3.5946
ALDH1L1	aldehyde dehydrogenase 1 family member L1 [Source:HGNC Symbol;Acc:HGNC:3978]	3.59205
MIR100HG	mir-100-let-7a-2-mir-125b-1 cluster host gene [Source:HGNC Symbol;Acc:HGNC:39522]	3.58424
NFATC4	nuclear factor of activated T cells 4 [Source:HGNC Symbol;Acc:HGNC:7778]	3.57075
HMGA2	high mobility group AT-hook 2 [Source:HGNC Symbol;Acc:HGNC:5009]	3.56345
BICC1	BicC family RNA binding protein 1 [Source:HGNC Symbol;Acc:HGNC:19351]	3.54843
LAMC3	laminin subunit gamma 3 [Source:HGNC Symbol;Acc:HGNC:6494]	3.54705
SCARA3	scavenger receptor class A member 3 [Source:HGNC Symbol;Acc:HGNC:19000]	3.52705
ACSL6	acyl-CoA synthetase long chain family member 6 [Source:HGNC Symbol;Acc:HGNC:16496]	3.51717
ARHGEF4	Rho guanine nucleotide exchange factor 4 [Source:HGNC Symbol;Acc:HGNC:684]	3.51576
KCNN2	potassium calcium-activated channel subfamily N member 2 [Source:HGNC Symbol;Acc:HGNC:6291]	3.51391
ITGA2	integrin subunit alpha 2 [Source:HGNC Symbol;Acc:HGNC:6137]	3.50557
UBXN10	UBX domain protein 10 [Source:HGNC Symbol;Acc:HGNC:26354]	3.49494
AC103702.2	novel transcript	3.49188
MDK	midkine [Source:HGNC Symbol;Acc:HGNC:6972]	3.48214
IFITM10	interferon induced transmembrane protein 10 [Source:HGNC Symbol;Acc:HGNC:40022]	3.47284
ADAM22	ADAM metallopeptidase domain 22 [Source:HGNC Symbol;Acc:HGNC:201]	3.47082
MC2R	melanocortin 2 receptor [Source:HGNC Symbol;Acc:HGNC:6930]	3.44798
FAM171B	family with sequence similarity 171 member B [Source:HGNC Symbol;Acc:HGNC:29412]	3.43207
ALDH1A2	aldehyde dehydrogenase 1 family member A2 [Source:HGNC Symbol;Acc:HGNC:15472]	3.42947
NAGS	N-acetylglutamate synthase [Source:HGNC Symbol;Acc:HGNC:17996]	3.40761
RUNX1T1	RUNX1 partner transcriptional co-repressor 1 [Source:HGNC Symbol;Acc:HGNC:1535]	3.40233
MAP7D2	MAP7 domain containing 2 [Source:HGNC Symbol;Acc:HGNC:25899]	3.39859
CA11	carbonic anhydrase 11 [Source:HGNC Symbol;Acc:HGNC:1370]	3.39647
AL136962.1	long intergenic non-protein coding RNA 540	3.39609
BDNF	brain derived neurotrophic factor [Source:HGNC Symbol;Acc:HGNC:1033]	3.38481
SLC4A8	solute carrier family 4 member 8 [Source:HGNC Symbol;Acc:HGNC:11034]	3.3535
NR4A3	nuclear receptor subfamily 4 group A member 3 [Source:HGNC Symbol;Acc:HGNC:7982]	3.33717
RASAL1	RAS protein activator like 1 [Source:HGNC Symbol;Acc:HGNC:9873]	3.32019
KHDRBS3	KH RNA binding domain containing, signal transduction associated 3 [Source:HGNC Symbol;Acc:HGNC:18117]	3.31788
SV2B	synaptic vesicle glycoprotein 2B [Source:HGNC Symbol;Acc:HGNC:16874]	3.31756
CCDC73	coiled-coil domain containing 73 [Source:HGNC Symbol;Acc:HGNC:23261]	3.31731
LRATD1	LRAT domain containing 1 [Source:HGNC Symbol;Acc:HGNC:20743]	3.31568
TMEM221	transmembrane protein 221 [Source:HGNC Symbol;Acc:HGNC:21943]	3.30986
TMEM108	transmembrane protein 108 [Source:HGNC Symbol;Acc:HGNC:28451]	3.30069
CIB4	calcium and integrin binding family member 4 [Source:HGNC Symbol;Acc:HGNC:33703]	3.29935
SPON1	spondin 1 [Source:HGNC Symbol;Acc:HGNC:11252]	3.29472
LARP6	La ribonucleoprotein 6, translational regulator [Source:HGNC Symbol;Acc:HGNC:24012]	3.28837
GATA3	GATA binding protein 3 [Source:HGNC Symbol;Acc:HGNC:4172]	3.28768
PRRX1	paired related homeobox 1 [Source:HGNC Symbol;Acc:HGNC:9142]	3.28511
NPTX1	neuronal pentraxin 1 [Source:HGNC Symbol;Acc:HGNC:7952]	3.28506
LRRN2	leucine rich repeat neuronal 2 [Source:HGNC Symbol;Acc:HGNC:16914]	3.28446
SRPX	sushi repeat containing protein X-linked [Source:HGNC Symbol;Acc:HGNC:11309]	3.27739
CSRP2	cysteine and glycine rich protein 2 [Source:HGNC Symbol;Acc:HGNC:2470]	3.27394
TMEM25	transmembrane protein 25 [Source:HGNC Symbol;Acc:HGNC:25890]	3.2623
WNT3	Wnt family member 3 [Source:HGNC Symbol;Acc:HGNC:12782]	3.24628
SLC22A17	solute carrier family 22 member 17 [Source:HGNC Symbol;Acc:HGNC:23095]	3.23858
INPP4B	inositol polyphosphate-4-phosphatase type II B [Source:HGNC Symbol;Acc:HGNC:6075]	3.23226
CTHRC1	collagen triple helix repeat containing 1 [Source:HGNC Symbol;Acc:HGNC:18831]	3.2259
PHLDA1	pleckstrin homology like domain family A member 1 [Source:HGNC Symbol;Acc:HGNC:8933]	3.2212
CCDC184	coiled-coil domain containing 184 [Source:HGNC Symbol;Acc:HGNC:33749]	3.21909
PRKD3	protein kinase D3 [Source:HGNC Symbol;Acc:HGNC:9408]	3.20689
C11orf45	chromosome 11 open reading frame 45 [Source:HGNC Symbol;Acc:HGNC:28584]	3.20681
ETV5	ETS variant transcription factor 5 [Source:HGNC Symbol;Acc:HGNC:3494]	3.19505
RTN4R	reticulon 4 receptor [Source:HGNC Symbol;Acc:HGNC:18601]	3.19203
AATK	apoptosis associated tyrosine kinase [Source:HGNC Symbol;Acc:HGNC:21]	3.18621
PITX1	paired like homeodomain 1 [Source:HGNC Symbol;Acc:HGNC:9004]	3.17161
HYAL1	hyaluronidase 1 [Source:HGNC Symbol;Acc:HGNC:5320]	3.16422
SLC16A2	solute carrier family 16 member 2 [Source:HGNC Symbol;Acc:HGNC:10923]	3.16052
SLC6A9	solute carrier family 6 member 9 [Source:HGNC Symbol;Acc:HGNC:11056]	3.15884
AMOT	angiomotin [Source:HGNC Symbol;Acc:HGNC:17810]	3.13478
PLPP2	phospholipid phosphatase 2 [Source:HGNC Symbol;Acc:HGNC:9230]	3.13335
CD5	CD5 molecule [Source:HGNC Symbol;Acc:HGNC:1685]	3.12951
EML6	EMAP like 6 [Source:HGNC Symbol;Acc:HGNC:35412]	3.12034
PRSS35	serine protease 35 [Source:HGNC Symbol;Acc:HGNC:21387]	3.11998
JAM2	junctional adhesion molecule 2 [Source:HGNC Symbol;Acc:HGNC:14686]	3.11924
HS3ST3B1	heparan sulfate-glucosamine 3-sulfotransferase 3B1 [Source:HGNC Symbol;Acc:HGNC:5198]	3.11817
COL4A3	collagen type IV alpha 3 chain [Source:HGNC Symbol;Acc:HGNC:2204]	3.10615
ATP2A3	ATPase sarcoplasmic/endoplasmic reticulum Ca2+ transporting 3 [Source:HGNC Symbol;Acc:HGNC:813]	3.1022
CACNB4	calcium voltage-gated channel auxiliary subunit beta 4 [Source:HGNC Symbol;Acc:HGNC:1404]	3.10134
TNFSF13B	TNF superfamily member 13b [Source:HGNC Symbol;Acc:HGNC:11929]	3.08396
NANOGP1	Nanog homeobox pseudogene 1 [Source:HGNC Symbol;Acc:HGNC:23099]	3.08342
NFASC	neurofascin [Source:HGNC Symbol;Acc:HGNC:29866]	3.08207
SLC47A1	solute carrier family 47 member 1 [Source:HGNC Symbol;Acc:HGNC:25588]	3.07344
ELOVL4	ELOVL fatty acid elongase 4 [Source:HGNC Symbol;Acc:HGNC:14415]	3.07185
VSTM4	V-set and transmembrane domain containing 4 [Source:HGNC Symbol;Acc:HGNC:26470]	3.07184
SMO	smoothened, frizzled class receptor [Source:HGNC Symbol;Acc:HGNC:11119]	3.06542
ALCAM	activated leukocyte cell adhesion molecule [Source:HGNC Symbol;Acc:HGNC:400]	3.05833
SEMA3C	semaphorin 3C [Source:HGNC Symbol;Acc:HGNC:10725]	3.05784
UNC79	unc-79 homolog, NALCN channel complex subunit [Source:HGNC Symbol;Acc:HGNC:19966]	3.05492
CRABP2	cellular retinoic acid binding protein 2 [Source:HGNC Symbol;Acc:HGNC:2339]	3.03405
JPH2	junctophilin 2 [Source:HGNC Symbol;Acc:HGNC:14202]	3.0281
SERINC5	serine incorporator 5 [Source:HGNC Symbol;Acc:HGNC:18825]	3.02691
SORBS2	sorbin and SH3 domain containing 2 [Source:HGNC Symbol;Acc:HGNC:24098]	3.02217
RARG	retinoic acid receptor gamma [Source:HGNC Symbol;Acc:HGNC:9866]	3.02183
PLEKHF1	pleckstrin homology and FYVE domain containing 1 [Source:HGNC Symbol;Acc:HGNC:20764]	3.01058
ATP1B2	ATPase Na+/K+ transporting subunit beta 2 [Source:HGNC Symbol;Acc:HGNC:805]	3.00849
CCND1	cyclin D1 [Source:HGNC Symbol;Acc:HGNC:1582]	3.00844
CLGN	calmegin [Source:HGNC Symbol;Acc:HGNC:2060]	3.00608
FAM149A	family with sequence similarity 149 member A [Source:HGNC Symbol;Acc:HGNC:24527]	2.99852
RGS14	regulator of G protein signaling 14 [Source:HGNC Symbol;Acc:HGNC:9996]	2.9914
DAAM2	dishevelled associated activator of morphogenesis 2 [Source:HGNC Symbol;Acc:HGNC:18143]	2.97178
GNAL	G protein subunit alpha L [Source:HGNC Symbol;Acc:HGNC:4388]	2.97027
LINC01616	long intergenic non-protein coding RNA 1616 [Source:HGNC Symbol;Acc:HGNC:51900]	2.97008
HEPH	hephaestin [Source:HGNC Symbol;Acc:HGNC:4866]	2.96904
PDE5A	phosphodiesterase 5A [Source:HGNC Symbol;Acc:HGNC:8784]	2.96711
SYTL5	synaptotagmin like 5 [Source:HGNC Symbol;Acc:HGNC:15589]	2.96007
FAM110B	family with sequence similarity 110 member B [Source:HGNC Symbol;Acc:HGNC:28587]	2.95786
SBSPON	somatomedin B and thrombospondin type 1 domain containing [Source:HGNC Symbol;Acc:HGNC:30362]	2.95093
CAPN5	calpain 5 [Source:HGNC Symbol;Acc:HGNC:1482]	2.9498
INSYN1	inhibitory synaptic factor 1 [Source:HGNC Symbol;Acc:HGNC:33753]	2.94274
HR	HR lysine demethylase and nuclear receptor corepressor [Source:HGNC Symbol;Acc:HGNC:5172]	2.93793
CACNB2	calcium voltage-gated channel auxiliary subunit beta 2 [Source:HGNC Symbol;Acc:HGNC:1402]	2.93297
KREMEN2	kringle containing transmembrane protein 2 [Source:HGNC Symbol;Acc:HGNC:18797]	2.93102
AL049838.1	novel transcript, overlapping C14orf37	2.93012
RAET1G	retinoic acid early transcript 1G [Source:HGNC Symbol;Acc:HGNC:16795]	2.92639
EFNA5	ephrin A5 [Source:HGNC Symbol;Acc:HGNC:3225]	2.92529
RBPMS2	RNA binding protein, mRNA processing factor 2 [Source:HGNC Symbol;Acc:HGNC:19098]	2.92224
PPM1E	protein phosphatase, Mg2+/Mn2+ dependent 1E [Source:HGNC Symbol;Acc:HGNC:19322]	2.91676
PNMA6A	PNMA family member 6A [Source:HGNC Symbol;Acc:HGNC:28248]	2.91259
RNF217	ring finger protein 217 [Source:HGNC Symbol;Acc:HGNC:21487]	2.91236
ADGRD1	adhesion G protein-coupled receptor D1 [Source:HGNC Symbol;Acc:HGNC:19893]	2.91111
FAM110C	family with sequence similarity 110 member C [Source:HGNC Symbol;Acc:HGNC:33340]	2.91032
NPNT	nephronectin [Source:HGNC Symbol;Acc:HGNC:27405]	2.90832
ERN1	endoplasmic reticulum to nucleus signaling 1 [Source:HGNC Symbol;Acc:HGNC:3449]	2.8946
ISLR2	immunoglobulin superfamily containing leucine rich repeat 2 [Source:HGNC Symbol;Acc:HGNC:29286]	2.88639
GPR61	G protein-coupled receptor 61 [Source:HGNC Symbol;Acc:HGNC:13300]	2.88104
PYGO1	pygopus family PHD finger 1 [Source:HGNC Symbol;Acc:HGNC:30256]	2.86144
MAPK8IP2	mitogen-activated protein kinase 8 interacting protein 2 [Source:HGNC Symbol;Acc:HGNC:6883]	2.85589
CLDN1	claudin 1 [Source:HGNC Symbol;Acc:HGNC:2032]	2.85006
DTX1	deltex E3 ubiquitin ligase 1 [Source:HGNC Symbol;Acc:HGNC:3060]	2.84527
MINAR1	membrane integral NOTCH2 associated receptor 1 [Source:HGNC Symbol;Acc:HGNC:29172]	2.84503
NUDT11	nudix hydrolase 11 [Source:HGNC Symbol;Acc:HGNC:18011]	2.84409
RAB39B	RAB39B, member RAS oncogene family [Source:HGNC Symbol;Acc:HGNC:16499]	2.84353
MFAP4	microfibril associated protein 4 [Source:HGNC Symbol;Acc:HGNC:7035]	2.84005
KIF5A	kinesin family member 5A [Source:HGNC Symbol;Acc:HGNC:6323]	2.83466
LY75	lymphocyte antigen 75 [Source:HGNC Symbol;Acc:HGNC:6729]	2.83463
ADH1B	alcohol dehydrogenase 1B (class I), beta polypeptide [Source:HGNC Symbol;Acc:HGNC:250]	2.8345
GPRC5C	G protein-coupled receptor class C group 5 member C [Source:HGNC Symbol;Acc:HGNC:13309]	2.82542
ACAN	aggrecan [Source:HGNC Symbol;Acc:HGNC:319]	2.82353
EVC	EvC ciliary complex subunit 1 [Source:HGNC Symbol;Acc:HGNC:3497]	2.82352
KAZN	kazrin, periplakin interacting protein [Source:HGNC Symbol;Acc:HGNC:29173]	2.81505
FBXL7	F-box and leucine rich repeat protein 7 [Source:HGNC Symbol;Acc:HGNC:13604]	2.81433
GRB14	growth factor receptor bound protein 14 [Source:HGNC Symbol;Acc:HGNC:4565]	2.8134
PRR7	proline rich 7, synaptic [Source:HGNC Symbol;Acc:HGNC:28130]	2.80598
ATL1	atlastin GTPase 1 [Source:HGNC Symbol;Acc:HGNC:11231]	2.79422
CYP11B2	cytochrome P450 family 11 subfamily B member 2 [Source:HGNC Symbol;Acc:HGNC:2592]	2.79126
ADAMTS9-AS2	ADAMTS9 antisense RNA 2 [Source:HGNC Symbol;Acc:HGNC:42435]	2.78977
AC079949.2	novel transcript	2.7877
KCNG1	potassium voltage-gated channel modifier subfamily G member 1 [Source:HGNC Symbol;Acc:HGNC:6248]	2.78686
DNM3	dynamin 3 [Source:HGNC Symbol;Acc:HGNC:29125]	2.78579
SDK2	sidekick cell adhesion molecule 2 [Source:HGNC Symbol;Acc:HGNC:19308]	2.78423
PARVB	parvin beta [Source:HGNC Symbol;Acc:HGNC:14653]	2.78317
ARG2	arginase 2 [Source:HGNC Symbol;Acc:HGNC:664]	2.76796
RHBG	Rh family B glycoprotein (gene/pseudogene) [Source:HGNC Symbol;Acc:HGNC:14572]	2.76385
ATRNL1	attractin like 1 [Source:HGNC Symbol;Acc:HGNC:29063]	2.75507
PTGIS	prostaglandin I2 synthase [Source:HGNC Symbol;Acc:HGNC:9603]	2.75426
OPRL1	opioid related nociceptin receptor 1 [Source:HGNC Symbol;Acc:HGNC:8155]	2.74729
LUM	lumican [Source:HGNC Symbol;Acc:HGNC:6724]	2.74457
HOXB8	homeobox B8 [Source:HGNC Symbol;Acc:HGNC:5119]	2.74173
SPTLC3	serine palmitoyltransferase long chain base subunit 3 [Source:HGNC Symbol;Acc:HGNC:16253]	2.74062
LAMA2	laminin subunit alpha 2 [Source:HGNC Symbol;Acc:HGNC:6482]	2.74056
ASIC1	acid sensing ion channel subunit 1 [Source:HGNC Symbol;Acc:HGNC:100]	2.73687
SRCIN1	SRC kinase signaling inhibitor 1 [Source:HGNC Symbol;Acc:HGNC:29506]	2.73647
EFNA3	ephrin A3 [Source:HGNC Symbol;Acc:HGNC:3223]	2.73603
HSH2D	hematopoietic SH2 domain containing [Source:HGNC Symbol;Acc:HGNC:24920]	2.73472
ID2	inhibitor of DNA binding 2 [Source:HGNC Symbol;Acc:HGNC:5361]	2.73186
AC005052.1	TEC	2.72257
SLC44A4	solute carrier family 44 member 4 [Source:HGNC Symbol;Acc:HGNC:13941]	2.71517
ETV1	ETS variant transcription factor 1 [Source:HGNC Symbol;Acc:HGNC:3490]	2.71032
PDK4	pyruvate dehydrogenase kinase 4 [Source:HGNC Symbol;Acc:HGNC:8812]	2.70826
TWSG1	twisted gastrulation BMP signaling modulator 1 [Source:HGNC Symbol;Acc:HGNC:12429]	2.69943
CDHR1	cadherin related family member 1 [Source:HGNC Symbol;Acc:HGNC:14550]	2.69927
LRRC17	leucine rich repeat containing 17 [Source:HGNC Symbol;Acc:HGNC:16895]	2.68945
IZUMO1	izumo sperm-egg fusion 1 [Source:HGNC Symbol;Acc:HGNC:28539]	2.67658
GPC4	glypican 4 [Source:HGNC Symbol;Acc:HGNC:4452]	2.67332
WDFY3-AS2	WDFY3 antisense RNA 2 [Source:HGNC Symbol;Acc:HGNC:21603]	2.65089
B3GNT9	UDP-GlcNAc:betaGal beta-1,3-N-acetylglucosaminyltransferase 9 [Source:HGNC Symbol;Acc:HGNC:28714]	2.64213
LSP1	lymphocyte specific protein 1 [Source:HGNC Symbol;Acc:HGNC:6707]	2.64
KLHDC8A	kelch domain containing 8A [Source:HGNC Symbol;Acc:HGNC:25573]	2.6347
IGHG1	immunoglobulin heavy constant gamma 1 (G1m marker) [Source:HGNC Symbol;Acc:HGNC:5525]	2.63396
RNF128	ring finger protein 128 [Source:HGNC Symbol;Acc:HGNC:21153]	2.6083
RPSAP70	ribosomal protein SA pseudogene 70 [Source:HGNC Symbol;Acc:HGNC:51923]	2.60236
AL139220.2	novel transcript	2.59628
SEMA4G	semaphorin 4G [Source:HGNC Symbol;Acc:HGNC:10735]	2.5856
RASGEF1A	RasGEF domain family member 1A [Source:HGNC Symbol;Acc:HGNC:24246]	2.58123
FLRT2	fibronectin leucine rich transmembrane protein 2 [Source:HGNC Symbol;Acc:HGNC:3761]	2.56305
SESN3	sestrin 3 [Source:HGNC Symbol;Acc:HGNC:23060]	2.55844
KCNMB4	potassium calcium-activated channel subfamily M regulatory beta subunit 4 [Source:HGNC Symbol;Acc:HGNC:6289]	2.5396
ERN2	endoplasmic reticulum to nucleus signaling 2 [Source:HGNC Symbol;Acc:HGNC:16942]	2.53772
TEC	tec protein tyrosine kinase [Source:HGNC Symbol;Acc:HGNC:11719]	2.53566
WDR63	WD repeat domain 63 [Source:HGNC Symbol;Acc:HGNC:30711]	2.53027
MAP6	microtubule associated protein 6 [Source:HGNC Symbol;Acc:HGNC:6868]	2.52851
PRICKLE1	prickle planar cell polarity protein 1 [Source:HGNC Symbol;Acc:HGNC:17019]	2.52817
THNSL2	threonine synthase like 2 [Source:HGNC Symbol;Acc:HGNC:25602]	2.52531
IGKC	immunoglobulin kappa constant [Source:HGNC Symbol;Acc:HGNC:5716]	2.52386
PCDHGB4	protocadherin gamma subfamily B, 4 [Source:HGNC Symbol;Acc:HGNC:8711]	2.51463
LIN7A	lin-7 homolog A, crumbs cell polarity complex component [Source:HGNC Symbol;Acc:HGNC:17787]	2.51301
CDK6	cyclin dependent kinase 6 [Source:HGNC Symbol;Acc:HGNC:1777]	2.50689
MYO5B	myosin VB [Source:HGNC Symbol;Acc:HGNC:7603]	2.50618
HS3ST1	heparan sulfate-glucosamine 3-sulfotransferase 1 [Source:HGNC Symbol;Acc:HGNC:5194]	2.50329
SSPO	SCO-spondin [Source:HGNC Symbol;Acc:HGNC:21998]	2.50056

## Sheet: venn_overlaps
WNT_component_vs_Heaton_vs_Leng	WNT_component_vs_Heaton	WNT_component_vs_Leng
APCDD1	ABCB4	CACNB2
ISM1	SHOC1	GRB14
NRXN2	ITGA2	SP5
PDE2A	TNFSF4	FAM171B
AXIN2	CCN3	MYH7B
ETV5	LAMC3	SYTL5
UGCG	CIB4	ATP2B3
DAAM2	GOLGA7B	LRCH2
RNF43	WDFY3-AS2	CPB1
DAB2	SEMA4G	NR4A3
NKD1	SLC44A4	SLC6A9
PEG10	SESN3	UBXN10
RIMS2	TNFRSF19	SAMD11
LEF1	GATA3	STEAP2
CTHRC1	ERN1	SEMA3C
SBSPON	COL11A1	SHROOM3
CCND1	LY75	DTX1
ETV1	PXYLP1	CALN1
ID2	KCNJ5	VGF
PLCL2	ASTN1	ALDH1L1
TMEM25	HLF	ATP10A
HMGA2	LGR5	ACAN
TCF7	AFF3	TMEM200A
WNT4	HSD3B2	KIF5A
TSPAN8	FAM169A	FGF20
NFATC4	ESRRG	FAM149A
KHDRBS3	KAZN	SORBS2
CSRP2	CILP2	INPP4B
PGM5	JAM2	LGI3
TGFB2	CLDN1	MIR100HG
TAFA4	PRRX1	RBPMS2
PDE5A	BMP4	ALDH1A2
	RORB	TMEM108
	IGSF5	EML6
	SYTL2	SLC2A4
	CDH2	ABR
	QPCT	TMEM132E
	TPBG	RASL10B
	EFNA3	PPM1E
	LINC01116	HOXB9
	RELN	HOXB8
	CGNL1	ETV4
	TUBBP5	AATK
	PDK4	FST
	SV2A	ATL1
	LRRC17	PRICKLE1
	TEC	CHRD
	PDZRN3	LSAMP
	PRKD3	MYO5B
	PCP4	ATRNL1
	MERTK
	CCDC170
	TWSG1
	TNFSF13B
	SLIT2
	RTN4R
	IFITM10
	PARVB
	COLGALT2
	LIN7A
	HS3ST1
	CDK6
	ALCAM
	ADAMTS9-AS2
	DPP10
	AGTR1
	MC2R

## Sheet: Leng_2020_upregulated
entrez	symbol	ensembl	GOF_mean	WT_mean	GOF-WT_LogFC	P.Value	adj.P.Val		GOF-WT_LogFC: log2 expression value of Beta-catenin gain-of-function mice minus log2 expression value of WT mice.
11982	Atp10a	ENSMUSG00000025324	7.89844	6.65829	1.2418	6.26608e-10	8.87469e-06
56336	B4galt5	ENSMUSG00000017929	7.4825	5.79153	1.69051	1.24122e-09	8.87469e-06
26559	Hunk	ENSMUSG00000053414	4.93055	3.05617	1.88889	5.8882e-09	1.81031e-05
240055	Neurl1b	ENSMUSG00000034413	5.93072	4.19003	1.74603	6.3241e-09	1.81031e-05
16847	Lepr	ENSMUSG00000057722	6.05926	4.25237	1.81405	6.32977e-09	1.81031e-05
109272	Mybpc1	ENSMUSG00000020061	6.00486	-0.147515	6.12703	9.5265e-09	2.27048e-05
207728	Pde2a	ENSMUSG00000030653	9.5038	8.22715	1.27767	1.3463e-08	2.75029e-05
69399	1700025G04Rik	ENSMUSG00000032666	6.86663	5.56076	1.30634	1.91734e-08	3.42725e-05
73181	Nfatc4	ENSMUSG00000023411	5.63072	3.92352	1.70638	2.7666e-08	4.14461e-05
494504	Apcdd1	ENSMUSG00000071847	5.79861	4.10142	1.70012	2.89833e-08	4.14461e-05
77583	Notum	ENSMUSG00000042988	4.23707	1.99922	2.24612	3.46188e-08	4.37064e-05
319909	Ism1	ENSMUSG00000074766	6.29974	4.17492	2.13791	3.66767e-08	4.37064e-05
70435	Inf2	ENSMUSG00000037679	5.67482	4.51385	1.15024	4.11935e-08	4.53129e-05
320088	C030034L19Rik	ENSMUSG00000097365	2.26356	0.432279	1.81752	5.92996e-08	5.60824e-05
76071	Jakmip1	ENSMUSG00000063646	3.49262	1.6674	1.81802	6.39184e-08	5.60824e-05
14114	Fbln1	ENSMUSG00000006369	5.41973	3.2507	2.15467	6.81297e-08	5.60824e-05
219072	Haus4	ENSMUSG00000022177	6.54183	5.29229	1.24969	6.90421e-08	5.60824e-05
218454	Lhfpl2	ENSMUSG00000045312	6.20224	4.87291	1.32952	7.05932e-08	5.60824e-05
93960	Nkd1	ENSMUSG00000031661	6.96843	4.99493	1.97307	9.06153e-08	6.66793e-05
71973	Rbpms2	ENSMUSG00000032387	5.50722	4.64332	0.862083	9.68567e-08	6.66793e-05
16475	Ajuba	ENSMUSG00000022178	6.66372	5.28939	1.37098	9.79206e-08	6.66793e-05
242484	D630039A03Rik	ENSMUSG00000052117	5.47479	4.02236	1.44673	1.05489e-07	6.85676e-05
224860	Plcl2	ENSMUSG00000038910	7.23331	6.16141	1.07288	1.29725e-07	8.06548e-05
19882	Mst1r	ENSMUSG00000032584	5.23478	3.2196	2.02161	1.41122e-07	8.40851e-05
15354	Hmgb3	ENSMUSG00000015217	6.9324	5.95529	0.977481	1.81013e-07	0.000101082
23936	Lynx1	ENSMUSG00000022594	7.92393	6.61724	1.31089	1.83785e-07	0.000101082
67252	Cap2	ENSMUSG00000021373	3.53907	1.84317	1.69337	1.95526e-07	0.000103556
228026	Pdk1	ENSMUSG00000006494	5.38381	6.28747	-0.902217	2.2007e-07	0.00010996
17984	Ndn	ENSMUSG00000033585	8.18581	7.12179	1.06135	2.24559e-07	0.00010996
11647	Alpl	ENSMUSG00000028766	3.31442	0.914651	2.41748	2.30685e-07	0.00010996
76441	Daam2	ENSMUSG00000040260	6.39934	4.96435	1.43642	2.49649e-07	0.000115161
666794	Rbm24	ENSMUSG00000038132	4.8707	2.35553	2.49899	2.72993e-07	0.00012142
71721	Fam13c	ENSMUSG00000043259	5.29086	4.19069	1.10218	2.80399e-07	0.00012142
17294	Mest	ENSMUSG00000051855	7.17421	5.18411	1.99507	2.88691e-07	0.00012142
17532	Mras	ENSMUSG00000032470	6.83536	6.09773	0.73814	3.20517e-07	0.000130954
73825	Ppp1r21	ENSMUSG00000034709	6.45945	5.79224	0.668027	3.43405e-07	0.000134391
98733	Obsl1	ENSMUSG00000026211	5.60128	4.64548	0.944542	3.47724e-07	0.000134391
98496	Pid1	ENSMUSG00000045658	5.18696	4.3048	0.880607	4.42197e-07	0.000166406
76703	Cpb1	ENSMUSG00000011463	5.70131	3.91611	1.8043	4.61112e-07	0.000169074
268756	Gulo	ENSMUSG00000034450	4.69765	3.08389	1.62161	4.90528e-07	0.000173207
78449	2700046A07Rik	ENSMUSG00000041789	4.1672	2.89968	1.27122	5.24637e-07	0.000173207
209195	Clic6	ENSMUSG00000022949	3.76245	-1.55117	5.27878	5.25652e-07	0.000173207
12294	Cacna2d3	ENSMUSG00000021991	3.10746	1.61423	1.49323	5.28292e-07	0.000173207
74559	Elovl7	ENSMUSG00000021696	4.7231	3.14471	1.57953	5.32945e-07	0.000173207
94224	Srd5a2	ENSMUSG00000038541	5.6182	7.07482	-1.45867	5.52695e-07	0.000175634
26564	Ror2	ENSMUSG00000021464	3.79499	2.61376	1.18757	6.37122e-07	0.000187411
102747	Lrrc49	ENSMUSG00000047766	6.29134	5.39397	0.899786	6.39195e-07	0.000187411
14615	Gjc1	ENSMUSG00000034520	3.93127	2.93066	1.00364	6.40556e-07	0.000187411
17153	Mal	ENSMUSG00000027375	5.04514	3.7552	1.29308	6.42176e-07	0.000187411
14829	Grpr	ENSMUSG00000031364	3.587	1.69717	1.90935	6.66918e-07	0.000190739
18606	Enpp2	ENSMUSG00000022425	6.2718	4.84134	1.43674	6.98461e-07	0.000195843
71898	Apol9b	ENSMUSG00000068246	-0.117022	1.84854	-1.99487	7.13398e-07	0.000196185
270120	Fat3	ENSMUSG00000074505	3.95798	1.80208	2.14205	7.7717e-07	0.00020732
19271	Ptprj	ENSMUSG00000025314	4.61168	3.82773	0.782539	7.82887e-07	0.00020732
69938	Scrn1	ENSMUSG00000019124	7.33332	6.05916	1.27559	8.32406e-07	0.000216426
235604	Camkv	ENSMUSG00000032936	4.80015	2.88101	1.92509	9.23939e-07	0.000235934
241528	Lrrc55	ENSMUSG00000075224	5.45871	3.61134	1.84492	9.89636e-07	0.000248277
320982	Arl4c	ENSMUSG00000049866	5.74134	4.71872	1.02234	1.10383e-06	0.000272151
12006	Axin2	ENSMUSG00000000142	5.92685	4.98287	0.939445	1.15135e-06	0.000279055
77629	Sphkap	ENSMUSG00000026163	6.87296	5.3055	1.57176	1.22808e-06	0.000285557
18557	Cdk18	ENSMUSG00000026437	5.67956	4.27399	1.40216	1.24568e-06	0.000285557
271786	Galnt13	ENSMUSG00000060988	2.17048	-1.4117	3.56788	1.24642e-06	0.000285557
109934	Abr	ENSMUSG00000017631	7.18243	6.53267	0.651225	1.25805e-06	0.000285557
22151	Tubb2a	ENSMUSG00000058672	4.91875	3.90639	1.00573	1.33795e-06	0.000298947
214253	Etnk2	ENSMUSG00000070644	4.42635	2.99573	1.41442	1.38707e-06	0.000301744
97130	C77080	ENSMUSG00000050390	4.95341	3.9733	0.9937	1.39266e-06	0.000301744
628900	Serpina3i	ENSMUSG00000079014	-1.35833	0.75095	-2.11176	1.42548e-06	0.000304244
78004	Prr15	ENSMUSG00000045725	3.20523	1.20371	2.03372	1.52418e-06	0.000320526
13132	Dab2	ENSMUSG00000022150	10.1736	9.32075	0.852719	1.72279e-06	0.000349761
71481	Alpk1	ENSMUSG00000028028	5.05863	3.59687	1.46836	1.73393e-06	0.000349761
15551	Htr1b	ENSMUSG00000049511	3.82585	1.39109	2.42345	1.73658e-06	0.000349761
13992	Khdrbs3	ENSMUSG00000022332	6.11128	5.13736	0.976702	1.78927e-06	0.000355369
240354	Malt1	ENSMUSG00000032688	6.28716	5.2265	1.06726	2.10305e-06	0.000411967
54156	Egfl6	ENSMUSG00000000402	4.85273	3.81946	1.02451	2.14845e-06	0.000415173
140904	Caln1	ENSMUSG00000060371	6.25559	5.06032	1.1929	2.21525e-06	0.000422375
17427	Mns1	ENSMUSG00000032221	3.71173	1.94621	1.77122	2.64971e-06	0.000494745
233733	Galnt18	ENSMUSG00000038296	5.42472	3.85199	1.57293	2.66401e-06	0.000494745
19378	Aldh1a2	ENSMUSG00000013584	6.81602	5.85314	0.962254	2.759e-06	0.000505817
217946	Cdca7l	ENSMUSG00000021175	3.83559	1.47278	2.35466	2.96474e-06	0.000536655
26971	Pla2g2f	ENSMUSG00000028749	7.31887	6.23022	1.08613	3.09329e-06	0.000538408
18590	Pdgfa	ENSMUSG00000025856	5.18483	4.28564	0.914082	3.10099e-06	0.000538408
240725	Sulf1	ENSMUSG00000016918	6.68277	5.03367	1.65443	3.10446e-06	0.000538408
20378	Frzb	ENSMUSG00000027004	7.55753	8.63304	-1.07516	3.12502e-06	0.000538408
54446	Nfat5	ENSMUSG00000003847	8.70918	7.89118	0.817003	3.34852e-06	0.000570046
15168	Hcn3	ENSMUSG00000028051	2.71918	4.10414	-1.39932	3.44623e-06	0.000579778
14183	Fgfr2	ENSMUSG00000030849	8.38244	7.63618	0.746107	3.51312e-06	0.000584159
20128	Trim30a	ENSMUSG00000030921	4.24436	5.43018	-1.17147	3.64563e-06	0.000599225
83554	Fstl3	ENSMUSG00000020325	3.50775	4.24276	-0.74306	3.73006e-06	0.000606135
223604	Kcnk9	ENSMUSG00000036760	5.73214	4.67004	1.06428	3.77359e-06	0.000606319
56018	Stard10	ENSMUSG00000030688	5.57909	4.89452	0.684601	3.8762e-06	0.000607325
16625	Serpina3c	ENSMUSG00000066361	3.74172	4.48143	-0.73548	3.90507e-06	0.000607325
17025	Alad	ENSMUSG00000028393	7.37976	6.56379	0.81763	3.90727e-06	0.000607325
232313	Gxylt2	ENSMUSG00000030074	0.219615	-2.26584	2.52294	3.95742e-06	0.000608506
20356	Sema5a	ENSMUSG00000022231	6.40981	5.07576	1.3345	4.13025e-06	0.000628325
12226	Btg1	ENSMUSG00000036478	6.55599	5.75931	0.795851	4.20621e-06	0.000633145
72565	Uaca	ENSMUSG00000034485	6.73896	5.90442	0.83424	4.3194e-06	0.000643411
19252	Dusp1	ENSMUSG00000024190	5.78567	4.52816	1.25184	4.53915e-06	0.000669173
217721	Flvcr2	ENSMUSG00000034258	3.26248	1.72433	1.54387	4.72947e-06	0.000690117
18782	Pla2g2d	ENSMUSG00000041202	3.65318	2.19238	1.48396	4.82751e-06	0.000697308
619321	9530052E02Rik	ENSMUSG00000096938	2.32743	0.348687	1.96335	4.95097e-06	0.000707989
667373	Ifit1bl1	ENSMUSG00000079339	0.603346	1.89829	-1.29428	5.02174e-06	0.000709877
77220	Tmem200a	ENSMUSG00000049420	6.71089	5.70089	1.01005	5.06346e-06	0.000709877
71145	Scara5	ENSMUSG00000022032	4.2351	5.68265	-1.45527	5.18456e-06	0.000719799
276952	Rasl10b	ENSMUSG00000020684	5.258	3.99921	1.26511	5.30342e-06	0.00072922
333605	Frmpd4	ENSMUSG00000049176	4.90982	3.64501	1.26105	5.42986e-06	0.000739496
15039	H2-T22	ENSMUSG00000056116	5.07872	5.80863	-0.731897	5.82037e-06	0.000785201
20348	Sema3c	ENSMUSG00000028780	3.8344	2.42616	1.39811	6.12337e-06	0.000818357
320452	P4ha3	ENSMUSG00000051048	2.43013	-0.958856	3.3817	6.22754e-06	0.000824573
381629	Atraid	ENSMUSG00000013622	6.24464	6.90015	-0.656374	6.31448e-06	0.000828414
320508	Cachd1	ENSMUSG00000028532	4.55484	3.69945	0.843512	6.53621e-06	0.000842076
16774	Lama3	ENSMUSG00000024421	4.74499	3.03788	1.72603	6.53639e-06	0.000842076
18417	Cldn11	ENSMUSG00000037625	4.04493	2.7384	1.31313	6.60212e-06	0.000842949
76187	Adhfe1	ENSMUSG00000025911	5.26796	6.1332	-0.868499	6.72837e-06	0.000851467
14069	F8	ENSMUSG00000031196	3.82071	4.4689	-0.635868	7.34448e-06	0.000919146
381544	Armh1	ENSMUSG00000060268	2.25889	0.741883	1.50477	7.39174e-06	0.000919146
53331	Stx7	ENSMUSG00000019998	7.66864	6.92444	0.74269	7.51794e-06	0.000922135
12296	Cacnb2	ENSMUSG00000057914	6.74685	5.88946	0.85757	7.54474e-06	0.000922135
12010	B2m	ENSMUSG00000060802	8.97289	9.71824	-0.744253	8.87639e-06	0.0010757
71956	Rnf135	ENSMUSG00000020707	3.51754	4.26246	-0.740662	8.99724e-06	0.00108118
97998	Deptor	ENSMUSG00000022419	7.58181	8.29268	-0.70957	9.08047e-06	0.00108209
665113	Tnik	ENSMUSG00000027692	4.90829	4.20718	0.699656	9.17357e-06	0.00108415
18484	Pam	ENSMUSG00000026335	9.3894	8.82427	0.565212	9.80581e-06	0.00114937
72821	Scn2b	ENSMUSG00000070304	3.9048	2.91484	1.00485	9.9696e-06	0.00115907
241624	Exd1	ENSMUSG00000048647	2.8938	0.98091	1.88467	1.01978e-05	0.00117604
14229	Fkbp5	ENSMUSG00000024222	6.79113	6.13015	0.660631	1.04026e-05	0.00117874
22601	Yap1	ENSMUSG00000053110	7.07649	6.63007	0.446526	1.05012e-05	0.00117874
230259	E130308A19Rik	ENSMUSG00000045071	4.67746	3.71449	0.967178	1.05823e-05	0.00117874
56079	Astn2	ENSMUSG00000028373	3.20286	2.20377	1.00766	1.06066e-05	0.00117874
19701	Ren1	ENSMUSG00000070645	7.10728	3.76796	3.35748	1.06334e-05	0.00117874
104099	Itga9	ENSMUSG00000039115	7.29299	7.84388	-0.550963	1.10526e-05	0.00120915
16400	Itga3	ENSMUSG00000001507	6.22098	5.72073	0.498803	1.12862e-05	0.00120915
231510	Gpat3	ENSMUSG00000029314	3.24977	2.00184	1.24242	1.13039e-05	0.00120915
13800	Enah	ENSMUSG00000022995	5.71165	5.16061	0.55255	1.13153e-05	0.00120915
22330	Vcl	ENSMUSG00000021823	7.84396	7.1757	0.669541	1.13762e-05	0.00120915
211134	Lzts1	ENSMUSG00000036306	3.53356	2.22732	1.32045	1.1415e-05	0.00120915
12443	Ccnd1	ENSMUSG00000070348	8.07953	7.28373	0.797547	1.18814e-05	0.00124929
108012	Ap1s2	ENSMUSG00000031367	5.20089	4.34784	0.857534	1.2119e-05	0.00126003
229900	Gbp7	ENSMUSG00000040253	5.68509	6.42759	-0.743495	1.21597e-05	0.00126003
22036	Traip	ENSMUSG00000032586	2.50998	1.29356	1.23035	1.23135e-05	0.00126679
11608	Agtr1b	ENSMUSG00000054988	6.16694	4.35617	1.83645	1.25743e-05	0.00128438
17129	Smad5	ENSMUSG00000021540	7.17896	6.64817	0.529076	1.28154e-05	0.00129972
13865	Nr2f1	ENSMUSG00000069171	4.31859	3.65747	0.667954	1.31207e-05	0.00132131
16411	Itgax	ENSMUSG00000030789	1.95217	3.40129	-1.44785	1.33936e-05	0.00133496
21414	Tcf7	ENSMUSG00000000782	5.62573	5.03611	0.593277	1.35336e-05	0.00133496
192198	Lrrc4	ENSMUSG00000049939	3.9657	2.17431	1.80897	1.35475e-05	0.00133496
277396	Klhl23	ENSMUSG00000042155	4.44209	5.30562	-0.85225	1.36296e-05	0.00133496
12876	Cpe	ENSMUSG00000037852	10.8336	10.0762	0.757605	1.41092e-05	0.00137253
227358	Erfe	ENSMUSG00000047443	1.98626	0.0134659	1.95455	1.45254e-05	0.00140347
236920	Stard8	ENSMUSG00000031216	6.30907	5.57134	0.739502	1.47364e-05	0.0014065
231549	Lrrc8d	ENSMUSG00000046079	7.15109	6.74174	0.408483	1.47535e-05	0.0014065
225030	Kcng3	ENSMUSG00000045053	1.60834	-0.370082	1.99202	1.51109e-05	0.00143103
20454	St3gal5	ENSMUSG00000056091	7.61836	7.00941	0.612724	1.63544e-05	0.0015386
211550	Tifa	ENSMUSG00000046688	3.67094	2.66984	1.00134	1.6724e-05	0.00156309
12349	Car2	ENSMUSG00000027562	6.22291	5.42357	0.801145	1.69273e-05	0.00157182
22228	Ucp2	ENSMUSG00000033685	8.29704	7.51358	0.787057	1.80387e-05	0.00166422
26926	Aifm1	ENSMUSG00000036932	7.93583	7.51248	0.423048	1.8239e-05	0.00167191
12846	Comt	ENSMUSG00000000326	8.42646	7.52189	0.908056	1.83569e-05	0.001672
22754	Zfp92	ENSMUSG00000031374	1.58404	-0.176977	1.76862	1.85445e-05	0.00167839
15959	Ifit3	ENSMUSG00000074896	3.5205	5.04561	-1.52219	1.8716e-05	0.00168326
112419	Ifit1bl2	ENSMUSG00000067297	0.001981	1.47674	-1.48205	1.90068e-05	0.00168839
170676	Peg10	ENSMUSG00000092035	9.55538	8.37136	1.18928	1.90091e-05	0.00168839
98363	Efhd1	ENSMUSG00000026255	8.77531	8.23411	0.545321	1.93655e-05	0.00170943
116838	Rims2	ENSMUSG00000037386	6.01804	4.74586	1.27109	1.9541e-05	0.00171433
15957	Ifit1	ENSMUSG00000034459	4.04447	5.19377	-1.16072	2.06359e-05	0.00179935
21886	Tle2	ENSMUSG00000034771	5.74804	4.545	1.18551	2.10753e-05	0.00181541
21802	Tgfa	ENSMUSG00000029999	4.98504	5.50973	-0.526181	2.11276e-05	0.00181541
19243	Ptp4a1	ENSMUSG00000026064	6.28443	5.37621	0.903233	2.1201e-05	0.00181541
29873	Cspg5	ENSMUSG00000032482	5.18992	4.51195	0.687921	2.15105e-05	0.00183095
27053	Asns	ENSMUSG00000029752	5.6513	4.87922	0.768238	2.21385e-05	0.00185654
26950	Vsnl1	ENSMUSG00000054459	6.92152	5.82764	1.09518	2.21607e-05	0.00185654
434341	Nlrc5	ENSMUSG00000074151	2.54472	3.57431	-1.04679	2.22006e-05	0.00185654
77015	Mpped2	ENSMUSG00000016386	5.03531	4.35377	0.675659	2.27116e-05	0.00188823
68133	Gcsh	ENSMUSG00000034424	6.14739	6.63681	-0.488777	2.31395e-05	0.00191268
104156	Etv5	ENSMUSG00000013089	5.59141	4.78593	0.795364	2.43881e-05	0.00200236
21354	Tap1	ENSMUSG00000037321	4.56076	5.45363	-0.896854	2.45044e-05	0.00200236
237759	Col23a1	ENSMUSG00000063564	5.04317	4.19316	0.863378	2.60769e-05	0.00209916
67896	Ccdc80	ENSMUSG00000022665	5.84283	4.9347	0.904061	2.61101e-05	0.00209916
12217	Bsn	ENSMUSG00000032589	2.89744	4.0854	-1.18623	2.61294e-05	0.00209916
226041	Pgm5	ENSMUSG00000041731	5.26531	4.23355	1.05336	2.66523e-05	0.00212921
66859	Slc16a9	ENSMUSG00000037762	4.02532	2.71245	1.30404	2.77855e-05	0.00218905
667370	Ifit3b	ENSMUSG00000062488	2.30427	3.8284	-1.52202	2.78423e-05	0.00218905
15040	H2-T23	ENSMUSG00000067212	5.51697	6.17363	-0.659972	2.78606e-05	0.00218905
70861	Akr1cl	ENSMUSG00000025955	10.9206	11.6431	-0.725883	2.90724e-05	0.00225245
21834	Thrb	ENSMUSG00000021779	6.32399	7.33185	-1.00939	2.91257e-05	0.00225245
99887	Tlcd4	ENSMUSG00000028132	6.98345	6.36593	0.618053	2.92356e-05	0.00225245
16832	Ldhb	ENSMUSG00000030246	6.32507	5.36948	0.956507	2.92976e-05	0.00225245
268595	D430019H16Rik	ENSMUSG00000094910	4.32181	4.97349	-0.646277	3.00118e-05	0.00229502
74204	Xpo6	ENSMUSG00000000131	6.96731	6.55624	0.411259	3.09932e-05	0.00235746
77996	Cutal	ENSMUSG00000026870	0.2439	-2.21724	2.48849	3.13568e-05	0.0023725
228846	D630003M21Rik	ENSMUSG00000037813	3.61924	1.78726	1.83517	3.20127e-05	0.00240938
14675	Gna14	ENSMUSG00000024697	6.62933	5.70378	0.925716	3.23524e-05	0.00242219
102920	Cenpi	ENSMUSG00000031262	2.37681	1.15881	1.22576	3.33743e-05	0.00248569
17828	Bloc1s5	ENSMUSG00000038982	5.36147	5.86939	-0.505967	3.44419e-05	0.0025393
218440	Ankrd34b	ENSMUSG00000045034	2.0241	3.85804	-1.79166	3.44493e-05	0.0025393
59036	Dact1	ENSMUSG00000044548	5.11484	3.8603	1.27328	3.53007e-05	0.00258872
226250	Afap1l2	ENSMUSG00000025083	4.66333	3.64356	1.02172	3.5576e-05	0.00259559
22793	Zyx	ENSMUSG00000029860	6.40915	5.68381	0.721639	3.62639e-05	0.00263236
105827	Amigo2	ENSMUSG00000048218	3.41113	2.68234	0.726428	3.70406e-05	0.00267516
19418	Rasgrf2	ENSMUSG00000021708	1.75185	2.82435	-1.06737	3.81535e-05	0.00273112
107272	Psat1	ENSMUSG00000024640	6.82098	5.83727	0.982954	3.82748e-05	0.00273112
68738	Acss1	ENSMUSG00000027452	4.4341	3.2167	1.17259	3.83885e-05	0.00273112
57764	Ntn4	ENSMUSG00000020019	5.61656	4.58919	1.03564	3.88318e-05	0.00274899
68262	Agpat4	ENSMUSG00000023827	5.17219	4.64819	0.521892	3.95469e-05	0.00278581
14009	Etv1	ENSMUSG00000004151	5.88395	5.19996	0.68932	4.11212e-05	0.00288252
27281	Plaat1	ENSMUSG00000022525	2.52641	3.33492	-0.7909	4.22829e-05	0.00294229
100043232	3110099E03Rik	ENSMUSG00000085582	-0.182332	1.32752	-1.50519	4.23854e-05	0.00294229
14367	Fzd5	ENSMUSG00000045005	4.60643	3.95852	0.656863	4.32309e-05	0.00298648
268890	Lsamp	ENSMUSG00000061080	3.08885	3.80771	-0.713126	4.35239e-05	0.00299227
18612	Etv4	ENSMUSG00000017724	2.09406	-0.0100703	2.11661	4.40786e-05	0.0030159
230775	Adgrb2	ENSMUSG00000028782	5.53871	4.63848	0.894103	4.45695e-05	0.00303497
56095	Ftsj3	ENSMUSG00000020706	6.85197	6.45259	0.400064	4.58624e-05	0.00309619
16842	Lef1	ENSMUSG00000027985	4.09221	3.05739	1.00237	4.59016e-05	0.00309619
56278	Gkap1	ENSMUSG00000021552	4.8812	4.37037	0.517172	4.78196e-05	0.003196
207742	Rnf43	ENSMUSG00000034177	3.78804	2.96265	0.855901	4.78282e-05	0.003196
27385	Magel2	ENSMUSG00000056972	2.10803	0.733652	1.40015	4.8535e-05	0.00322622
72472	Slc16a10	ENSMUSG00000019838	4.51976	3.81677	0.702638	4.87317e-05	0.00322622
20312	Cx3cl1	ENSMUSG00000031778	6.36764	5.36387	1.00526	4.92508e-05	0.00323362
17349	Mlf1	ENSMUSG00000048416	2.74496	1.7469	1.01233	4.93227e-05	0.00323362
233066	Syne4	ENSMUSG00000019737	3.98162	2.94632	1.03271	4.95219e-05	0.00323362
68703	Rere	ENSMUSG00000039852	7.18353	6.72654	0.457284	5.07577e-05	0.00329925
66425	Pcp4l1	ENSMUSG00000038370	6.13057	4.721	1.41459	5.13327e-05	0.00332153
11636	Ak1	ENSMUSG00000026817	5.74335	6.41313	-0.671351	5.2637e-05	0.00335365
384061	Fndc5	ENSMUSG00000001334	3.3665	4.36582	-0.969782	5.26479e-05	0.00335365
116871	Mta3	ENSMUSG00000055817	6.48341	5.90621	0.575829	5.27569e-05	0.00335365
672511	Rnf213	ENSMUSG00000070327	6.39721	6.98543	-0.587605	5.29418e-05	0.00335365
19417	Rasgrf1	ENSMUSG00000032356	4.53832	3.81099	0.717971	5.30018e-05	0.00335365
104175	Sbk1	ENSMUSG00000042978	6.64845	7.22968	-0.583455	5.34355e-05	0.0033662
68027	Tmem178	ENSMUSG00000024245	4.32835	2.72356	1.66438	5.48082e-05	0.00342558
666048	Trabd2b	ENSMUSG00000070867	2.65627	1.16344	1.4995	5.48571e-05	0.00342558
234214	Sorbs2	ENSMUSG00000031626	7.93441	7.3397	0.598021	5.55071e-05	0.00345109
17772	Mtm1	ENSMUSG00000031337	4.8364	5.41983	-0.575096	5.70276e-05	0.00352055
66106	Smpx	ENSMUSG00000041476	5.43631	4.1942	1.25212	5.71167e-05	0.00352055
56421	Pfkp	ENSMUSG00000021196	6.6396	6.18109	0.458491	5.76575e-05	0.00353864
56405	Dusp14	ENSMUSG00000018648	3.46635	2.56489	0.895042	5.86412e-05	0.00358166
229011	Samd10	ENSMUSG00000038605	4.55237	5.05163	-0.500681	5.88594e-05	0.00358166
215654	Cdh12	ENSMUSG00000040452	0.387665	-2.94437	3.31526	5.93915e-05	0.00359872
57742	Abhd1	ENSMUSG00000006638	5.24871	2.17385	3.11518	6.07991e-05	0.00366847
218461	Pde8b	ENSMUSG00000021684	6.6001	7.21742	-0.618065	6.14311e-05	0.00369103
94094	Trim34a	ENSMUSG00000056144	2.38087	3.70132	-1.31416	6.18557e-05	0.00369592
66447	Mgst3	ENSMUSG00000026688	6.50865	6.9004	-0.391874	6.20295e-05	0.00369592
20474	Six4	ENSMUSG00000034460	0.873526	-0.525604	1.39141	6.29552e-05	0.00373552
12655	Chil3	ENSMUSG00000040809	3.32245	0.354333	3.02227	6.33589e-05	0.00374394
18952	Septin4	ENSMUSG00000020486	5.50157	4.65037	0.851481	6.45405e-05	0.00379806
17912	Myo1b	ENSMUSG00000018417	7.67623	6.76766	0.908911	6.53292e-05	0.00381622
66559	Metap1d	ENSMUSG00000041921	4.76807	5.3449	-0.575558	6.56082e-05	0.00381622
16772	Lama1	ENSMUSG00000032796	4.59025	4.05792	0.522065	6.56496e-05	0.00381622
67991	Nacc2	ENSMUSG00000026932	5.7834	6.15243	-0.370352	6.70396e-05	0.00388124
192176	Flna	ENSMUSG00000031328	8.30516	7.75845	0.550111	6.73343e-05	0.00388258
14886	Gtf2i	ENSMUSG00000060261	8.21107	7.82697	0.384856	6.87257e-05	0.00392756
14860	Gsta4	ENSMUSG00000032348	6.34857	5.82308	0.524586	6.888e-05	0.00392756
60440	Iigp1	ENSMUSG00000054072	2.91639	4.08662	-1.1974	6.89383e-05	0.00392756
78896	Ecrg4	ENSMUSG00000026051	9.35507	8.12222	1.22672	6.97988e-05	0.00394654
20975	Synj2	ENSMUSG00000023805	4.33783	3.7584	0.570616	6.98234e-05	0.00394654
57814	Kcne4	ENSMUSG00000047330	4.09569	3.1239	0.989933	7.05867e-05	0.0039735
330812	Rnf150	ENSMUSG00000047747	5.82201	5.06499	0.760753	7.08562e-05	0.0039735
15018	H2-Q7	ENSMUSG00000060550	2.16118	3.591	-1.43748	7.31179e-05	0.00408432
11987	Slc7a1	ENSMUSG00000041313	7.74152	7.14011	0.605229	7.34937e-05	0.00408709
102371	Myzap	ENSMUSG00000041361	3.25306	2.07107	1.19353	7.3739e-05	0.00408709
239170	Fhip2b	ENSMUSG00000022095	5.27459	4.74906	0.520824	7.46154e-05	0.00411969
21788	Tfpi	ENSMUSG00000027082	6.22375	6.89456	-0.672272	7.53365e-05	0.00412962
16403	Itga6	ENSMUSG00000027111	7.87435	7.23959	0.633315	7.56463e-05	0.00412962
73095	Slc25a42	ENSMUSG00000002346	5.52387	4.95052	0.562065	7.58958e-05	0.00412962
60344	Fign	ENSMUSG00000075324	2.86432	2.03332	0.809899	7.59504e-05	0.00412962
142980	Tlr3	ENSMUSG00000031639	3.79202	4.36693	-0.575	7.67221e-05	0.00415578
243912	Hspb6	ENSMUSG00000036854	5.37268	4.67952	0.678806	7.76253e-05	0.00418883
18452	P4ha2	ENSMUSG00000018906	5.43247	4.941	0.487591	7.825e-05	0.00420667
74264	Rnf138rt1	ENSMUSG00000083695	0.801645	-1.16235	1.92496	7.98789e-05	0.00427298
117606	Boc	ENSMUSG00000022687	7.13854	6.71337	0.425937	8.00811e-05	0.00427298
242864	Napepld	ENSMUSG00000044968	6.65522	7.31217	-0.659577	8.07193e-05	0.00429102
381677	Vgf	ENSMUSG00000037428	3.27254	1.39601	1.83229	8.24243e-05	0.00436543
21929	Tnfaip3	ENSMUSG00000019850	3.30033	2.50137	0.798934	8.31347e-05	0.00438537
11536	Gpr182	ENSMUSG00000058396	3.66785	4.16718	-0.491622	8.3414e-05	0.00438537
53945	Slc40a1	ENSMUSG00000025993	4.41791	5.29319	-0.891399	8.46579e-05	0.00442002
20715	Serpina3g	ENSMUSG00000041481	3.25315	4.92891	-1.68291	8.46913e-05	0.00442002
51869	Rif1	ENSMUSG00000036202	5.81298	5.32649	0.489619	8.57432e-05	0.00445864
330319	Wipf3	ENSMUSG00000086040	2.06596	0.736134	1.32254	8.63449e-05	0.00446461
20679	Sox6	ENSMUSG00000051910	2.38687	1.47723	0.913001	8.64823e-05	0.00446461
72535	Aldh1b1	ENSMUSG00000035561	5.61657	6.51895	-0.904183	8.84111e-05	0.00454776
330064	Slc5a6	ENSMUSG00000006641	5.60867	5.13911	0.468339	9.15981e-05	0.00469481
104215	Rhoq	ENSMUSG00000024143	7.23698	6.67802	0.558942	9.49005e-05	0.0048467
320343	Lypd6	ENSMUSG00000050447	4.23926	5.48571	-1.21539	0.000100391	0.00510885
63955	Cables1	ENSMUSG00000040957	3.7968	3.20008	0.595627	0.000101685	0.00515636
232560	Caprin2	ENSMUSG00000030309	4.88713	4.28066	0.593449	0.000102619	0.00518533
71670	Acy3	ENSMUSG00000024866	4.59835	4.02207	0.584854	0.000104515	0.00526253
15531	Ndst1	ENSMUSG00000054008	7.37189	8.14096	-0.771602	0.000105588	0.00529794
218038	Amph	ENSMUSG00000021314	3.93026	3.15587	0.772362	0.000108363	0.00541816
218639	Arl15	ENSMUSG00000042348	5.52716	5.05367	0.473584	0.000109529	0.00545737
24004	Rai2	ENSMUSG00000043518	4.77162	4.28896	0.486564	0.000110762	0.00548623
72993	Appl1	ENSMUSG00000040760	6.52306	6.91687	-0.394123	0.000110875	0.00548623
233878	Sez6l2	ENSMUSG00000030683	5.74017	6.28082	-0.542778	0.000111309	0.00548711
547253	Parp14	ENSMUSG00000034422	4.77279	5.3987	-0.637643	0.000111913	0.00548711
21339	Taf1a	ENSMUSG00000072258	4.0376	3.42634	0.596988	0.000112386	0.00548711
94180	Acsbg1	ENSMUSG00000032281	7.04625	8.43751	-1.38078	0.000112579	0.00548711
224671	Btbd9	ENSMUSG00000062202	5.81123	5.22974	0.578239	0.000112812	0.00548711
67216	Mboat2	ENSMUSG00000020646	4.39946	3.25157	1.15103	0.000114366	0.00554382
14609	Gja1	ENSMUSG00000050953	7.35608	8.04062	-0.691894	0.000115713	0.00557947
270152	Jaml	ENSMUSG00000048534	2.18281	1.15074	1.04458	0.000116036	0.00557947
55927	Hes6	ENSMUSG00000067071	7.69744	6.86085	0.842503	0.000116272	0.00557947
26903	Dysf	ENSMUSG00000033788	5.98386	6.49632	-0.512279	0.000117065	0.00559878
80857	Fgf20	ENSMUSG00000031603	1.94135	-0.00150458	1.96469	0.000117629	0.00560699
100017	Ldlrap1	ENSMUSG00000037295	6.10306	5.56727	0.533632	0.0001231	0.0058372
545306	Gm5828	ENSMUSG00000091020	0.73704	-4.08532	4.84348	0.000123275	0.0058372
100532	Rell1	ENSMUSG00000047881	6.32179	5.86275	0.459254	0.000125555	0.00592552
19041	Ppl	ENSMUSG00000039457	2.97828	2.17654	0.812035	0.000126833	0.00596618
57905	Isy1	ENSMUSG00000030056	5.47295	4.95784	0.510003	0.00012726	0.0059666
107566	Arl2bp	ENSMUSG00000031776	6.92305	6.51364	0.409808	0.000132833	0.00620754
12153	Bmp1	ENSMUSG00000022098	5.71073	5.32186	0.387149	0.000134051	0.00624406
15413	Hoxb5	ENSMUSG00000038700	4.70427	4.24483	0.452371	0.000137268	0.00637315
107581	Col16a1	ENSMUSG00000040690	5.78001	4.67606	1.10682	0.000138548	0.00641175
20423	Shh	ENSMUSG00000002633	5.79183	4.86707	0.928889	0.000141421	0.00650579
23999	Twf2	ENSMUSG00000023277	6.30578	6.8297	-0.525791	0.000141563	0.00650579
52589	Ncald	ENSMUSG00000051359	6.44257	5.13432	1.30886	0.000142191	0.00650579
78339	Ttyh3	ENSMUSG00000036565	6.29131	7.40478	-1.11773	0.000142832	0.00650579
225638	Alpk2	ENSMUSG00000032845	1.55178	0.250607	1.31282	0.000142854	0.00650579
637913	Gm7224	ENSMUSG00000083623	-0.722807	-4.47234	3.75818	0.000143388	0.00650938
14086	Fscn1	ENSMUSG00000029581	4.71975	5.68764	-0.972395	0.000144572	0.00654234
140559	Igsf8	ENSMUSG00000038034	5.0092	5.48305	-0.470948	0.000145796	0.0065769
16499	Kcnab3	ENSMUSG00000018470	4.00967	3.37914	0.619275	0.000148226	0.00665018
16568	Kif3a	ENSMUSG00000018395	5.67792	5.2522	0.425056	0.000148549	0.00665018
106042	Prickle1	ENSMUSG00000036158	5.0168	4.31872	0.686312	0.000148815	0.00665018
11541	Adora2b	ENSMUSG00000018500	-0.361293	1.07438	-1.42395	0.000150341	0.00669743
98417	Cnih4	ENSMUSG00000062169	5.87938	5.49946	0.379631	0.000155057	0.00688608
140795	P2ry14	ENSMUSG00000036381	5.23025	4.41024	0.831143	0.000156191	0.00691494
625018	C4a	ENSMUSG00000015451	5.77494	6.43389	-0.659664	0.000157001	0.00692937
102640338	Gm26782	ENSMUSG00000097431	2.34895	3.42207	-1.06412	0.000158684	0.00696702
246710	Rhobtb2	ENSMUSG00000022075	3.94464	4.45887	-0.51447	0.000159101	0.00696702
237868	Sarm1	ENSMUSG00000050132	2.21199	2.92092	-0.709899	0.000159316	0.00696702
73873	Fam161a	ENSMUSG00000049811	4.22262	3.61861	0.591218	0.000160233	0.00697977
326618	Tpm4	ENSMUSG00000031799	7.56523	6.97022	0.595303	0.000160967	0.00697977
192970	Dhrs11	ENSMUSG00000034449	5.14762	4.5328	0.601476	0.000161072	0.00697977
67621	Bend5	ENSMUSG00000028545	4.29638	3.24305	1.07402	0.00016312	0.00704048
71007	D7Ertd443e	ENSMUSG00000030994	1.30757	-0.111699	1.40156	0.000163457	0.00704048
20492	Slbp	ENSMUSG00000004642	5.45313	5.07123	0.383984	0.000164234	0.0070494
12398	Cbfa2t3	ENSMUSG00000006362	2.69813	3.3722	-0.685026	0.00016465	0.0070494
74229	Paqr8	ENSMUSG00000025931	6.4621	6.97032	-0.509132	0.000169555	0.00723774
103466	Nt5dc3	ENSMUSG00000054027	7.49869	6.9446	0.554054	0.000174298	0.00741804
93695	Gpnmb	ENSMUSG00000029816	-0.447148	3.93452	-4.46355	0.000175059	0.0074283
15958	Ifit2	ENSMUSG00000045932	3.3811	4.06588	-0.669916	0.000175636	0.00743077
110542	Amhr2	ENSMUSG00000023047	0.0658357	-1.95724	1.96725	0.000177366	0.00748182
100616095	Snhg18	ENSMUSG00000096956	5.2325	4.50526	0.731663	0.000179942	0.00756817
57278	Bcam	ENSMUSG00000002980	6.2453	5.68601	0.562265	0.000184023	0.00771711
211652	Wwc1	ENSMUSG00000018849	6.73513	6.23654	0.497858	0.000184983	0.00773468
17068	Ly6d	ENSMUSG00000034634	9.48181	7.97239	1.49999	0.000185709	0.00774241
19249	Ptpn13	ENSMUSG00000034573	5.26938	4.76814	0.508317	0.000188131	0.00782055
70750	Kdsr	ENSMUSG00000009905	5.82329	6.23157	-0.407374	0.000189151	0.00782512
226830	Smyd2	ENSMUSG00000026603	6.56778	6.15047	0.41698	0.000189335	0.00782512
217866	Cdc42bpb	ENSMUSG00000021279	7.26566	6.81464	0.453206	0.000193803	0.0079797
64706	Scube1	ENSMUSG00000016763	4.11203	5.24209	-1.13411	0.000194713	0.0079797
327958	Pitpnm3	ENSMUSG00000040543	3.37182	2.38499	0.969567	0.000194991	0.0079797
259148	Or2t29	ENSMUSG00000064252	-1.25555	1.5989	-2.78332	0.000195307	0.0079797
78334	Cdk19	ENSMUSG00000038481	4.94427	5.29819	-0.35366	0.000199218	0.00811244
214444	Cdk5rap2	ENSMUSG00000039298	6.0907	6.79131	-0.701892	0.000199691	0.00811244
239667	Dip2b	ENSMUSG00000023026	4.66794	5.03834	-0.367238	0.000201023	0.00813312
13830	Stom	ENSMUSG00000026880	4.99016	5.44756	-0.45327	0.000201337	0.00813312
268706	Slc38a9	ENSMUSG00000047789	5.33707	5.82566	-0.487281	0.000202087	0.00814042
19248	Ptpn12	ENSMUSG00000028771	5.8708	5.41522	0.460575	0.000206388	0.00829032
21832	Thpo	ENSMUSG00000022847	1.28413	2.32197	-1.02687	0.000207706	0.00831986
57738	Slc15a2	ENSMUSG00000022899	3.09589	-0.675653	3.72653	0.000209389	0.00836385
245841	Polr2h	ENSMUSG00000021018	5.07627	5.46402	-0.383609	0.00021167	0.00840666
99470	Magi3	ENSMUSG00000052539	5.25897	4.86855	0.388508	0.000212161	0.00840666
58223	Mmp19	ENSMUSG00000025355	5.71962	6.28941	-0.571309	0.000212224	0.00840666
12385	Ctnna1	ENSMUSG00000037815	8.56105	8.05054	0.509749	0.000213901	0.00844967
215446	Entpd3	ENSMUSG00000041608	3.8523	4.4631	-0.623772	0.000217202	0.00852523
73598	1700001O22Rik	ENSMUSG00000044320	1.727	-0.0610265	1.78582	0.000217307	0.00852523
56357	Ivd	ENSMUSG00000027332	8.5821	9.06779	-0.482706	0.000218142	0.00852523
66743	Rnf220	ENSMUSG00000028677	6.9312	6.54459	0.386237	0.000218198	0.00852523
269037	Ctif	ENSMUSG00000052928	4.22805	5.03304	-0.806176	0.000223944	0.0087259
100039596	Tcf24	ENSMUSG00000099032	1.84508	2.7823	-0.924361	0.000225699	0.00877036
50795	Sh3bgr	ENSMUSG00000040666	4.10898	3.23485	0.879993	0.00022994	0.00891095
625638	Fam43b	ENSMUSG00000078235	2.1108	0.750877	1.34158	0.000231243	0.00892972
380928	Lmo7	ENSMUSG00000033060	4.76795	4.10983	0.659357	0.000231673	0.00892972
231821	Adap1	ENSMUSG00000056413	2.28393	1.48566	0.795781	0.000232611	0.00894175
15402	Hoxa5	ENSMUSG00000038253	3.38091	2.59834	0.760522	0.000236473	0.00906584
14634	Gli3	ENSMUSG00000021318	3.65162	2.97264	0.681181	0.000237614	0.00908523
99899	Ifi44	ENSMUSG00000028037	4.35337	5.15874	-0.791102	0.000239605	0.00913695
68201	Ccdc34	ENSMUSG00000027160	3.45957	2.87834	0.583007	0.000241626	0.0091895
621054	Tpm3-rs7	ENSMUSG00000058126	4.56313	0.457701	4.16544	0.000251195	0.00951675
225266	Klhl14	ENSMUSG00000042514	6.5222	7.00635	-0.484574	0.000251562	0.00951675
233571	P2ry6	ENSMUSG00000048779	2.41413	3.22182	-0.827253	0.000252441	0.00952481
14201	Fhl3	ENSMUSG00000032643	2.09875	1.32562	0.786531	0.000256298	0.0096416
21857	Timp1	ENSMUSG00000001131	4.91124	4.33014	0.576046	0.000256884	0.0096416
15364	Hmga2	ENSMUSG00000056758	2.66707	1.40644	1.25738	0.000263075	0.00984808
17533	Mrc1	ENSMUSG00000026712	4.75502	5.15581	-0.395984	0.000265343	0.00990706
50880	Scly	ENSMUSG00000026307	5.3957	4.85459	0.537812	0.000266712	0.00993223
23960	Oas1g	ENSMUSG00000066861	0.213947	1.11841	-0.894473	0.000269872	0.0100238
72309	Tmem158	ENSMUSG00000054871	3.42923	2.67475	0.745656	0.000272655	0.0101009
622901	Gm6368	ENSMUSG00000080775	1.75164	-1.44085	3.20607	0.000274899	0.0101578
328489	Gm2093	ENSMUSG00000097662	-1.67731	0.0444868	-1.72508	0.000276087	0.0101709
70552	Lrrc56	ENSMUSG00000038637	2.89545	3.4166	-0.522356	0.000276677	0.0101709
18826	Lcp1	ENSMUSG00000021998	4.82608	5.43146	-0.601231	0.000277564	0.0101773
320106	Slc38a11	ENSMUSG00000061171	3.84628	4.58126	-0.736211	0.000279989	0.0102382
320707	Atp2b3	ENSMUSG00000031376	6.90652	6.34218	0.56516	0.000280656	0.0102382
80708	Pacsin3	ENSMUSG00000027257	6.156	6.57687	-0.42136	0.000281911	0.0102578
14156	Fen1	ENSMUSG00000024742	4.60347	4.18873	0.427206	0.000282816	0.0102646
72386	2610035D17Rik	ENSMUSG00000087259	-1.46556	2.17452	-3.52871	0.000285049	0.0103195
71687	Tmem25	ENSMUSG00000002032	3.25169	4.26616	-1.04086	0.0002907	0.0104975
14964	H2-D1	ENSMUSG00000073411	7.78063	8.60413	-0.819462	0.000294764	0.0106174
330695	Ctxn1	ENSMUSG00000048644	3.03621	2.39927	0.624098	0.000299882	0.0107747
320429	Trank1	ENSMUSG00000062296	6.8537	6.20075	0.653183	0.000302609	0.0108454
212190	Ubxn10	ENSMUSG00000043621	2.16448	1.29167	0.879797	0.000309195	0.0110363
77733	Rnf170	ENSMUSG00000013878	3.62359	4.03608	-0.408703	0.00030948	0.0110363
22682	Zfand5	ENSMUSG00000024750	7.68759	7.14223	0.541908	0.000311863	0.0110936
106878	Smim3	ENSMUSG00000038059	5.10401	4.48993	0.601981	0.000325789	0.0115461
109700	Itga1	ENSMUSG00000042284	4.78739	5.1656	-0.372557	0.000326646	0.0115461
68659	Gask1b	ENSMUSG00000027955	3.54476	4.36797	-0.811864	0.000327005	0.0115461
11864	Arnt2	ENSMUSG00000015709	6.00488	6.48137	-0.477716	0.000328586	0.0115516
22417	Wnt4	ENSMUSG00000036856	8.93623	7.96169	0.976964	0.000328777	0.0115516
319742	Mpzl3	ENSMUSG00000070305	4.12653	3.59721	0.546175	0.000330805	0.0115863
277010	Marveld1	ENSMUSG00000044345	5.87019	5.46463	0.406414	0.000331384	0.0115863
66592	Stoml2	ENSMUSG00000028455	7.05243	7.35448	-0.302601	0.000334326	0.0116606
12563	Cdh6	ENSMUSG00000039385	4.41826	3.68635	0.754804	0.000338365	0.0117728
22035	Tnfsf10	ENSMUSG00000039304	3.55019	4.2004	-0.629852	0.000340526	0.0118033
494468	Armcx5	ENSMUSG00000072969	3.72094	4.39271	-0.6548	0.000340921	0.0118033
71310	Tbc1d9	ENSMUSG00000031709	4.46454	4.00151	0.465566	0.000341717	0.0118033
12227	Btg2	ENSMUSG00000020423	6.32466	5.1319	1.19024	0.000343367	0.0118317
622480	Spocd1	ENSMUSG00000028784	2.3389	0.789047	1.55851	0.000346093	0.0118897
75472	Cfap126	ENSMUSG00000026649	0.958597	-0.10543	1.05739	0.000346853	0.0118897
76454	Fbxo31	ENSMUSG00000052934	5.77456	5.34237	0.425569	0.000348131	0.0118897
57895	Ccdc126	ENSMUSG00000050786	4.16269	4.61906	-0.448189	0.000348377	0.0118897
19245	Ptp4a3	ENSMUSG00000059895	5.16516	4.77543	0.384849	0.000355272	0.0120726
76850	Ago4	ENSMUSG00000042500	3.58173	4.00761	-0.419385	0.000355424	0.0120726
212531	Sh3bgrl2	ENSMUSG00000032261	4.59182	4.02726	0.587437	0.000357579	0.0120906
17164	Mapkapk2	ENSMUSG00000016528	7.91144	7.34602	0.570606	0.000357645	0.0120906
225115	Svil	ENSMUSG00000024236	6.31879	5.77957	0.539959	0.000359039	0.0120967
17761	Map7	ENSMUSG00000019996	4.796	4.44253	0.350945	0.00036018	0.0120967
170439	Elovl6	ENSMUSG00000041220	6.48648	5.91564	0.567754	0.000360364	0.0120967
108767	Pnrc1	ENSMUSG00000040128	6.34049	5.87582	0.463876	0.000362633	0.0121402
242553	Kank4	ENSMUSG00000035407	4.23211	3.58247	0.647673	0.00036349	0.0121402
74315	Rnf145	ENSMUSG00000019189	7.22691	7.71957	-0.495866	0.000364206	0.0121402
53416	Stk39	ENSMUSG00000027030	7.20966	6.65889	0.552447	0.000366894	0.0121547
70122	Mllt3	ENSMUSG00000028496	5.28049	4.78182	0.495919	0.000367449	0.0121547
11898	Ass1	ENSMUSG00000076441	3.41943	2.63471	0.776374	0.000367775	0.0121547
20501	Slc16a1	ENSMUSG00000032902	5.16983	4.6935	0.480156	0.000369714	0.0121547
12767	Cxcr4	ENSMUSG00000045382	6.06795	4.69877	1.37116	0.000370153	0.0121547
101739	Psip1	ENSMUSG00000028484	6.54737	6.17642	0.371035	0.000370228	0.0121547
16508	Kcnd2	ENSMUSG00000060882	3.47206	2.76389	0.689045	0.000370592	0.0121547
16981	Lrrn3	ENSMUSG00000036295	7.26569	6.51958	0.744456	0.000371764	0.0121653
208177	Phldb2	ENSMUSG00000033149	6.33295	6.81782	-0.484514	0.000373471	0.0121932
226519	Lamc1	ENSMUSG00000026478	7.0207	6.732	0.288972	0.000374491	0.0121987
23872	Ets2	ENSMUSG00000022895	6.25515	5.92002	0.336138	0.000375471	0.0122028
21754	Tesk1	ENSMUSG00000028458	5.61075	5.16197	0.441809	0.000378406	0.0122703
67103	Ptgr1	ENSMUSG00000028378	5.98069	5.35894	0.62174	0.000381347	0.0123377
15016	H2-Q5	ENSMUSG00000055413	-0.441402	0.598448	-1.05249	0.000384114	0.0123992
30794	Pdlim4	ENSMUSG00000020388	3.84064	4.7826	-0.918013	0.000388887	0.012525
229474	Fhdc1	ENSMUSG00000041842	1.58689	3.06513	-1.48672	0.000394305	0.0126499
19242	Ptn	ENSMUSG00000029838	7.71211	6.77849	0.932917	0.000394536	0.0126499
65964	Map3k20	ENSMUSG00000004085	4.50998	4.8756	-0.368668	0.000397097	0.0126859
237711	Eml6	ENSMUSG00000044072	3.28001	3.83268	-0.552868	0.000397431	0.0126859
11607	Agtr1a	ENSMUSG00000049115	8.23256	7.42619	0.810077	0.000402438	0.012814
224093	Fam43a	ENSMUSG00000046546	5.40552	4.73316	0.683648	0.000403237	0.012814
11981	Atp9a	ENSMUSG00000027546	7.0004	6.47554	0.527048	0.000404427	0.0128233
17921	Myo7a	ENSMUSG00000030761	6.16567	7.27912	-1.11907	0.000408501	0.0129238
11595	Acan	ENSMUSG00000030607	1.68106	-0.635964	2.25569	0.000414536	0.0130858
22032	Traf4	ENSMUSG00000017386	5.08109	4.53575	0.543173	0.000416281	0.0131119
74931	4930481A15Rik	ENSMUSG00000086938	0.578455	2.52713	-1.90324	0.000418867	0.0131644
68519	Eml1	ENSMUSG00000058070	5.17865	4.74071	0.433426	0.000420597	0.0131751
17996	Neb	ENSMUSG00000026950	3.09973	3.92812	-0.81752	0.000421051	0.0131751
270893	Tmem132e	ENSMUSG00000020701	1.39903	2.16628	-0.750735	0.000425501	0.0132853
242202	Pde5a	ENSMUSG00000053965	6.5866	5.8991	0.689074	0.000428363	0.0133455
216848	Chd3	ENSMUSG00000018474	6.96477	6.62562	0.33998	0.000431716	0.0134148
17454	Mov10	ENSMUSG00000002227	4.15811	4.60906	-0.459049	0.000433101	0.0134148
259300	Ehd2	ENSMUSG00000074364	5.80468	5.13862	0.657374	0.000433402	0.0134148
229694	AI504432	ENSMUSG00000056145	0.057542	0.987813	-0.929398	0.000437681	0.013518
229877	Rap1gds1	ENSMUSG00000028149	6.57148	6.21048	0.361096	0.000439488	0.0135446
105440	Kctd9	ENSMUSG00000034327	5.63447	5.167	0.476887	0.00044369	0.0136265
68897	Disp1	ENSMUSG00000030768	4.79791	4.36622	0.421093	0.000444473	0.0136265
20708	Serpinb6b	ENSMUSG00000042842	6.04838	6.78029	-0.732198	0.000445004	0.0136265
117160	Ttyh2	ENSMUSG00000034714	6.77981	7.12385	-0.343867	0.000448875	0.0137156
105853	Mal2	ENSMUSG00000024479	0.808028	-1.33843	2.15861	0.000461482	0.0140708
140743	Rem2	ENSMUSG00000022176	0.397669	-1.13073	1.5292	0.000463973	0.0141166
105501	Abhd4	ENSMUSG00000040997	9.7963	10.2139	-0.417244	0.000474391	0.0143372
320295	C920006O11Rik	ENSMUSG00000097574	1.16529	2.48952	-1.33352	0.000475044	0.0143372
13853	Epm2a	ENSMUSG00000055493	4.4067	5.00294	-0.593259	0.000475115	0.0143372
78244	Dnajc21	ENSMUSG00000044224	5.50469	4.9947	0.50459	0.000475953	0.0143372
26563	Ror1	ENSMUSG00000035305	2.19011	2.76501	-0.585096	0.000476235	0.0143372
69352	Necab1	ENSMUSG00000040536	2.52084	3.22135	-0.692649	0.000477382	0.0143415
68292	Stt3b	ENSMUSG00000032437	7.91323	7.53102	0.382684	0.000480141	0.0143738
14313	Fst	ENSMUSG00000021765	2.16494	1.17177	0.977197	0.000480467	0.0143738
209200	Dtx3l	ENSMUSG00000049502	4.01637	4.55758	-0.558217	0.000482024	0.0143903
223672	Apol9a	ENSMUSG00000057346	0.0705273	1.45777	-1.42278	0.000485618	0.0144674
16590	Kit	ENSMUSG00000005672	2.11901	3.19604	-1.07705	0.000494993	0.0147017
15561	Htr3a	ENSMUSG00000032269	4.25082	3.14375	1.11452	0.000495541	0.0147017
12444	Ccnd2	ENSMUSG00000000184	9.31657	8.74753	0.570485	0.000496572	0.0147018
104444	Rexo2	ENSMUSG00000032026	6.44072	6.10342	0.337774	0.000501657	0.0148217
213469	Lgi3	ENSMUSG00000033595	4.38455	3.70645	0.670428	0.000503961	0.014859
80294	Pofut2	ENSMUSG00000020260	6.36768	5.99455	0.372227	0.000506089	0.0148911
15944	Irgm1	ENSMUSG00000046879	5.57342	6.06585	-0.493693	0.000511943	0.0150084
13603	Opn3	ENSMUSG00000026525	3.54535	3.00445	0.547679	0.000512174	0.0150084
114332	Lyve1	ENSMUSG00000030787	2.60557	1.75913	0.829265	0.00051905	0.0151788
241447	Cers6	ENSMUSG00000027035	2.59852	3.21326	-0.6152	0.000521125	0.0152083
30955	Pik3cg	ENSMUSG00000020573	1.89684	2.59329	-0.685702	0.000532703	0.015509
13726	Emd	ENSMUSG00000001964	6.22624	5.26644	0.950824	0.000533597	0.015509
15525	Hspa4	ENSMUSG00000020361	8.54153	8.14208	0.402587	0.000538072	0.0155831
19225	Ptgs2	ENSMUSG00000032487	2.24399	0.492009	1.72228	0.000538539	0.0155831
225600	Pde6a	ENSMUSG00000024575	-1.10773	0.287854	-1.3788	0.000539417	0.0155831
24110	Usp18	ENSMUSG00000030107	2.72071	3.70228	-0.993732	0.000546373	0.0156951
223626	Them6	ENSMUSG00000056665	3.62414	2.80334	0.825343	0.000546421	0.0156951
67775	Rtp4	ENSMUSG00000033355	3.48483	4.41632	-0.952614	0.000546586	0.0156951
11906	Zfhx3	ENSMUSG00000038872	5.14091	4.61727	0.509122	0.000548317	0.0157133
70561	Txndc16	ENSMUSG00000021830	5.94994	6.24771	-0.297607	0.000552673	0.0157652
15487	Hsd17b3	ENSMUSG00000033122	3.43517	1.02251	2.45216	0.00055272	0.0157652
18479	Pak1	ENSMUSG00000030774	5.10805	5.69431	-0.590595	0.000553436	0.0157652
75744	Svip	ENSMUSG00000074093	5.92017	6.25722	-0.335549	0.000557743	0.0158563
21677	Tead2	ENSMUSG00000030796	3.30519	2.71104	0.608338	0.000559618	0.0158781
23962	Oasl2	ENSMUSG00000029561	4.49529	5.24431	-0.76233	0.000561761	0.0159073
56874	Rnf32	ENSMUSG00000029130	3.06279	2.37995	0.696527	0.00056651	0.0159922
16570	Kif3c	ENSMUSG00000020668	5.82346	6.21739	-0.39748	0.000566995	0.0159922
70574	Cpm	ENSMUSG00000020183	5.9054	5.3862	0.521503	0.000574471	0.0161711
94353	Hmgn3	ENSMUSG00000066456	6.14457	5.80187	0.343456	0.000583953	0.0164058
11941	Atp2b2	ENSMUSG00000030302	3.00455	3.67694	-0.674184	0.000585663	0.0164157
68481	Mpzl1	ENSMUSG00000026566	4.7064	4.13648	0.567415	0.000586604	0.0164157
68082	Dusp19	ENSMUSG00000027001	3.77313	4.23062	-0.450813	0.000588815	0.016419
170719	Oxr1	ENSMUSG00000022307	8.6442	8.18243	0.459926	0.000589705	0.016419
15416	Hoxb8	ENSMUSG00000056648	6.26935	5.77095	0.496502	0.000590164	0.016419
140484	Pofut1	ENSMUSG00000046020	7.1575	7.67191	-0.514502	0.000594873	0.0165178
110557	H2-Q6	ENSMUSG00000073409	2.47404	3.81257	-1.35015	0.000598589	0.0165888
18739	Pitpnm1	ENSMUSG00000024851	5.94735	5.42303	0.517029	0.000600709	0.0166154
213272	Txndc2	ENSMUSG00000050612	4.06481	4.74984	-0.692181	0.000606211	0.0167352
19289	Igdcc3	ENSMUSG00000032394	1.14145	0.117508	1.01786	0.000608809	0.0167526
217951	Tmem196	ENSMUSG00000048004	-0.0672249	1.77541	-1.82034	0.000610892	0.0167526
22361	Vnn1	ENSMUSG00000037440	5.39824	6.08738	-0.687781	0.000612715	0.0167526
319236	Trim12c	ENSMUSG00000057143	5.19296	5.66155	-0.46135	0.000613947	0.0167526
67414	Mfn1	ENSMUSG00000027668	6.44922	6.04764	0.401628	0.000614623	0.0167526
21987	Tpd52l1	ENSMUSG00000000296	5.93459	5.51785	0.418155	0.00061494	0.0167526
433940	Fam222a	ENSMUSG00000041930	5.3543	4.11964	1.2023	0.000615043	0.0167526
170755	Sgk3	ENSMUSG00000025915	3.31828	3.89173	-0.564638	0.000618025	0.0168018
66864	Clec14a	ENSMUSG00000045930	3.73987	4.25758	-0.501435	0.000628128	0.0170441
19736	Rgs4	ENSMUSG00000038530	6.97146	6.14319	0.829266	0.000629646	0.0170529
70118	Srrd	ENSMUSG00000029346	4.43136	3.57783	0.813801	0.000635609	0.0171546
20555	Slfn1	ENSMUSG00000078763	-1.56681	-0.521041	-1.04219	0.0006358	0.0171546
20341	Selenbp1	ENSMUSG00000068874	5.13123	5.66415	-0.536986	0.000638699	0.0172004
226255	Atrnl1	ENSMUSG00000054843	6.06347	5.76426	0.299324	0.000641097	0.0172325
67426	Coq8a	ENSMUSG00000026489	7.01468	7.59223	-0.579078	0.000644344	0.0172873
73144	Mir100hg	ENSMUSG00000074415	4.31353	3.62143	0.702093	0.000647338	0.0173323
12908	Crat	ENSMUSG00000026853	6.00409	5.60003	0.401314	0.000648577	0.0173323
24045	Scamp3	ENSMUSG00000028049	6.31542	6.62524	-0.310122	0.000649659	0.0173323
21807	Tsc22d1	ENSMUSG00000022010	10.0422	10.5372	-0.497493	0.000653672	0.0174069
21814	Tgfbr3	ENSMUSG00000029287	8.14267	8.62567	-0.480418	0.000656216	0.0174089
17133	Maff	ENSMUSG00000042622	2.34228	0.928138	1.39625	0.000656468	0.0174089
239096	Cdh24	ENSMUSG00000059674	0.896924	-0.265689	1.16368	0.000658601	0.0174089
17777	Mttp	ENSMUSG00000028158	3.3421	3.88686	-0.556506	0.000660723	0.0174089
56422	Hbs1l	ENSMUSG00000019977	6.21293	5.83007	0.381159	0.000661877	0.0174089
67993	Nudt12	ENSMUSG00000024228	5.8581	6.29073	-0.43141	0.00066193	0.0174089
327978	Slfn5	ENSMUSG00000054404	4.43897	5.05822	-0.61612	0.000662267	0.0174089
654354	Glo1-ps	ENSMUSG00000075391	0.938704	-1.07451	2.02789	0.000672708	0.017628
20510	Slc1a1	ENSMUSG00000024935	0.620054	-1.55468	2.19865	0.000674277	0.017628
18584	Pde8a	ENSMUSG00000025584	5.37595	4.97886	0.391492	0.000674302	0.017628
19039	Lgals3bp	ENSMUSG00000033880	7.28459	8.01287	-0.723885	0.000676638	0.0176568
330406	B4galnt3	ENSMUSG00000041372	4.37803	3.95322	0.424397	0.000678628	0.0176765
320571	Atp8b5	ENSMUSG00000028457	2.13398	1.15583	0.997279	0.000682752	0.0177516
56708	Clcf1	ENSMUSG00000040663	1.99027	1.05848	0.913703	0.0006849	0.0177751
14924	Magi1	ENSMUSG00000045095	4.46847	3.15853	1.31082	0.000692138	0.0179304
93734	Mpv17l	ENSMUSG00000022679	4.2617	4.70046	-0.431291	0.000699627	0.0180667
50723	Icosl	ENSMUSG00000000732	4.71012	5.38623	-0.67726	0.000700888	0.0180667
76650	Srxn1	ENSMUSG00000032802	9.18162	7.96962	1.22675	0.00070122	0.0180667
12873	Cpa3	ENSMUSG00000001865	1.93283	0.505279	1.37854	0.000702455	0.0180667
329562	A530013C23Rik	ENSMUSG00000006462	-0.599113	0.470045	-1.07649	0.000704123	0.0180771
105653	Phyhip	ENSMUSG00000003469	3.11549	2.51921	0.597607	0.000712157	0.0182246
406217	Bex4	ENSMUSG00000047844	1.58109	0.819983	0.761497	0.000712416	0.0182246
12483	Cd22	ENSMUSG00000030577	-0.500799	0.744621	-1.2517	0.000717667	0.0183261
319765	Igf2bp2	ENSMUSG00000033581	3.27238	2.61502	0.663078	0.000721798	0.0183807
19339	Rab3a	ENSMUSG00000031840	5.89007	5.54834	0.339967	0.000723308	0.0183807
20249	Scd1	ENSMUSG00000037071	8.08772	7.23485	0.86486	0.000723658	0.0183807
114606	Tle6	ENSMUSG00000034758	5.01909	4.28769	0.715947	0.000726208	0.018392
19663	Rbpms	ENSMUSG00000031586	5.77502	5.42855	0.35104	0.000726676	0.018392
268451	Rab11fip4	ENSMUSG00000017639	2.76634	3.39006	-0.630256	0.000733969	0.0185437
233575	Pgap2	ENSMUSG00000030990	5.93345	6.35908	-0.425261	0.000743419	0.0187494
58226	Cacna1h	ENSMUSG00000024112	7.42465	6.99435	0.430785	0.000759604	0.0191238
17536	Meis2	ENSMUSG00000027210	7.92406	7.59123	0.332704	0.000763036	0.0191765
21335	Tacc3	ENSMUSG00000037313	2.8858	2.26352	0.631218	0.000770039	0.0192704
23918	Impdh2	ENSMUSG00000062867	6.14487	5.55144	0.586704	0.000772175	0.0192704
58250	Chst11	ENSMUSG00000034612	7.07029	6.57042	0.502548	0.00077372	0.0192704
12333	Capn1	ENSMUSG00000024942	6.10674	5.76321	0.343068	0.000774056	0.0192704
269003	Sap130	ENSMUSG00000024260	5.60689	5.29905	0.307338	0.000774663	0.0192704
244867	Arhgap20	ENSMUSG00000053199	2.03267	1.37548	0.653383	0.000774858	0.0192704
227937	Pkp4	ENSMUSG00000026991	5.41546	5.1159	0.295443	0.000780349	0.0193689
50527	Ero1a	ENSMUSG00000021831	5.62071	5.19467	0.429471	0.000782098	0.0193689
243382	Ppm1k	ENSMUSG00000037826	5.40249	5.9484	-0.54328	0.000782882	0.0193689
72685	Dnajc6	ENSMUSG00000028528	2.37816	2.93137	-0.559474	0.000784756	0.0193817
18431	Oca2	ENSMUSG00000030450	5.22762	4.33421	0.880389	0.000790446	0.0194555
170748	Smco4	ENSMUSG00000058173	3.67131	4.12004	-0.452865	0.000791454	0.0194555
381218	Spata6l	ENSMUSG00000064202	-0.121542	1.01162	-1.12523	0.000791827	0.0194555
20564	Slit3	ENSMUSG00000056427	5.11985	4.54545	0.562469	0.000804247	0.0197268
23971	Papss1	ENSMUSG00000028032	6.28295	6.75695	-0.474668	0.000808559	0.0197986
67702	Rnf149	ENSMUSG00000048234	5.90254	5.54516	0.356446	0.00081229	0.019856
16443	Itsn1	ENSMUSG00000022957	5.85572	5.41564	0.435793	0.000813914	0.0198617
74528	Mgme1	ENSMUSG00000027424	4.4646	5.00153	-0.526385	0.000817181	0.0199075
74735	Trim14	ENSMUSG00000039853	2.04697	2.75795	-0.718329	0.00082412	0.0200424
211329	Ncoa7	ENSMUSG00000039697	5.2965	5.68914	-0.39368	0.000827341	0.0200865
272396	Tarsl2	ENSMUSG00000030515	4.69157	5.07431	-0.380923	0.000833308	0.0201971
22234	Ugcg	ENSMUSG00000028381	6.29106	5.93781	0.354433	0.0008364	0.0202357
20166	Rtkn	ENSMUSG00000034930	4.31515	4.94923	-0.625817	0.000837729	0.0202357
13823	Epb41l3	ENSMUSG00000024044	5.09622	5.5726	-0.475809	0.000849725	0.0204669
67856	Echdc3	ENSMUSG00000039063	5.82268	6.21497	-0.394508	0.000852571	0.0204669
94187	Zfp423	ENSMUSG00000045333	3.29294	3.77987	-0.492538	0.000853556	0.0204669
20322	Sord	ENSMUSG00000027227	6.57111	6.03988	0.531385	0.000853702	0.0204669
235674	Acaa1b	ENSMUSG00000010651	0.198913	-3.2967	3.43204	0.000854457	0.0204669
72461	Prcp	ENSMUSG00000061119	4.5389	5.17546	-0.624596	0.000858446	0.0205281
68588	Cthrc1	ENSMUSG00000054196	3.36628	-0.352705	3.74383	0.000862528	0.0205912
244853	Nxpe4	ENSMUSG00000044229	3.6552	3.06381	0.600683	0.000870593	0.0207195
66926	Trmt6	ENSMUSG00000037376	5.10249	5.43551	-0.332374	0.000870824	0.0207195
432436	Gm5420	ENSMUSG00000056716	-1.27293	-0.290727	-0.983812	0.000872245	0.0207195
208777	Sned1	ENSMUSG00000047793	6.05546	5.51392	0.538422	0.00087493	0.0207337
231225	Tapt1	ENSMUSG00000046985	6.41606	6.03886	0.378738	0.000876011	0.0207337
67444	Ilkap	ENSMUSG00000026309	6.17407	5.87502	0.297952	0.000877194	0.0207337
269023	Zfp608	ENSMUSG00000052713	4.17908	3.71641	0.479495	0.000880373	0.0207745
244556	Zfp791	ENSMUSG00000074194	1.75239	0.397168	1.33686	0.000883848	0.0208042
17216	Mcm2	ENSMUSG00000002870	5.86219	5.35776	0.499326	0.000885493	0.0208042
667823	Trim5	ENSMUSG00000060441	0.502058	2.48423	-1.93794	0.000886434	0.0208042
17155	Man1a	ENSMUSG00000003746	7.4073	7.04945	0.355962	0.000888845	0.0208042
53605	Nap1l1	ENSMUSG00000058799	7.42204	7.06701	0.353381	0.000888905	0.0208042
66830	Nacc1	ENSMUSG00000001910	6.48344	6.21826	0.265006	0.000892981	0.0208347
14468	Gbp2b	ENSMUSG00000040264	1.57592	2.36141	-0.815704	0.000894056	0.0208347
269633	Wdr86	ENSMUSG00000055235	0.576891	1.5454	-0.968418	0.000894579	0.0208347
13819	Epas1	ENSMUSG00000024140	7.08033	7.45811	-0.375881	0.000896293	0.0208406
236727	Slc9a7	ENSMUSG00000037341	3.40993	3.86117	-0.449634	0.00089786	0.0208432
218544	Sgtb	ENSMUSG00000042743	3.50058	2.97963	0.512162	0.00090939	0.0210766
72113	Adck1	ENSMUSG00000021044	4.68756	5.09292	-0.405919	0.000913923	0.0211474
76142	Ppp1r14c	ENSMUSG00000040653	4.03751	4.70827	-0.641039	0.000921089	0.0212123
333789	N4bp2	ENSMUSG00000037795	4.28346	4.67409	-0.388604	0.000921212	0.0212123
76737	Creld2	ENSMUSG00000023272	5.23053	4.8525	0.372018	0.000921873	0.0212123
382207	Jade3	ENSMUSG00000037315	3.02681	3.54557	-0.514007	0.00092266	0.0212123
72748	Hdhd3	ENSMUSG00000038422	4.11318	3.5388	0.571498	0.00093665	0.0214651
14863	Gstm2	ENSMUSG00000040562	7.43419	6.64321	0.795173	0.000936659	0.0214651
407790	Ndufa4l2	ENSMUSG00000040280	4.97785	5.35436	-0.386837	0.000943438	0.0215267
20615	Snapin	ENSMUSG00000001018	6.23305	6.55191	-0.318381	0.000943659	0.0215267
217558	G2e3	ENSMUSG00000035293	4.24914	4.89854	-0.646789	0.00094454	0.0215267
57319	Smpdl3a	ENSMUSG00000019872	5.06053	5.47889	-0.41368	0.000945368	0.0215267
14461	Gata2	ENSMUSG00000015053	5.39067	5.80739	-0.413067	0.000949845	0.0215696
234889	Gucy1a2	ENSMUSG00000041624	1.06844	1.79611	-0.723695	0.000950271	0.0215696
84094	Plvap	ENSMUSG00000034845	6.92437	7.30773	-0.380907	0.000955505	0.0216385
74241	Chpf	ENSMUSG00000032997	6.46445	6.13355	0.33044	0.000956329	0.0216385
240121	Fsd1	ENSMUSG00000011589	-0.295321	0.527631	-0.825297	0.000963182	0.0217591
241568	Lrrc4c	ENSMUSG00000050587	2.75197	3.29636	-0.52896	0.000973905	0.0219666
75541	Nat8f4	ENSMUSG00000068299	5.3182	5.81802	-0.502289	0.000976153	0.0219827
27058	Srp9	ENSMUSG00000026511	5.40133	4.82549	0.563703	0.000983689	0.0221175
70383	Cox10	ENSMUSG00000042148	4.63792	4.30528	0.3314	0.000985967	0.022134
14172	Fgf18	ENSMUSG00000057967	2.39956e-05	-1.45579	1.44554	0.000990799	0.0222076
19294	Nectin2	ENSMUSG00000062300	6.25489	5.78646	0.46536	0.000993325	0.0222217
211586	Tfdp2	ENSMUSG00000032411	7.49209	7.05692	0.435973	0.000994538	0.0222217
105859	Csdc2	ENSMUSG00000042109	3.87164	4.31991	-0.451368	0.000998798	0.0222821
243312	Elfn1	ENSMUSG00000048988	4.71387	5.82057	-1.1135	0.00100525	0.0223911
13171	Dbt	ENSMUSG00000000340	6.95161	7.31065	-0.357741	0.00100781	0.0224132
20482	Skil	ENSMUSG00000027660	6.00019	5.65407	0.344162	0.00101051	0.0224384
27373	Csnk1e	ENSMUSG00000022433	6.28999	5.92215	0.365094	0.00101578	0.0225204
80904	Dtx3	ENSMUSG00000040415	6.48405	6.06872	0.413468	0.00101858	0.0225474
243371	Lrrc61	ENSMUSG00000073096	4.67317	5.11189	-0.437006	0.00102973	0.0227591
72145	Wdfy3	ENSMUSG00000043940	6.40176	6.08417	0.317518	0.00103413	0.022821
93747	Echs1	ENSMUSG00000025465	8.62122	8.95126	-0.327571	0.00104039	0.0228895
240327	Gm4951	ENSMUSG00000073555	0.11701	2.08391	-1.96622	0.00104127	0.0228895
16978	Lrrfip1	ENSMUSG00000026305	6.24158	5.9373	0.305009	0.00104275	0.0228895
244058	Rgma	ENSMUSG00000070509	2.85459	2.32364	0.551046	0.00104364	0.0228895
56468	Socs5	ENSMUSG00000037104	6.64588	6.25219	0.394089	0.00104816	0.0229535
76500	Ip6k2	ENSMUSG00000032599	5.49523	5.18039	0.309575	0.0010585	0.0231445
75316	Taf1d	ENSMUSG00000031939	4.13005	3.73171	0.406203	0.00106275	0.0231914
594844	Tceal3	ENSMUSG00000044550	3.8672	3.34968	0.523051	0.00106439	0.0231914
67260	Cers4	ENSMUSG00000008206	5.31862	4.73152	0.580304	0.00106635	0.0231914
102636154	Gm16124	ENSMUSG00000086914	2.49054	3.0839	-0.593308	0.00106776	0.0231914
98432	Phlpp1	ENSMUSG00000044340	4.6282	4.19332	0.426406	0.00106875	0.0231914
231147	Sh3tc1	ENSMUSG00000036553	5.10008	5.44537	-0.352872	0.00107482	0.0232878
72852	Mblac2	ENSMUSG00000051098	4.10049	4.49536	-0.392518	0.00107645	0.0232879
71586	Ifih1	ENSMUSG00000026896	4.97196	5.4415	-0.477333	0.00108376	0.0233937
67881	Mdp1	ENSMUSG00000002329	5.87782	6.19661	-0.317358	0.00108652	0.0233937
22145	Tuba4a	ENSMUSG00000026202	4.73406	4.22382	0.502076	0.00108767	0.0233937
100503659	Cbarp	ENSMUSG00000035640	6.11657	4.92859	1.17235	0.00108789	0.0233937
208836	Fanci	ENSMUSG00000039187	1.35765	0.280231	1.08614	0.00108956	0.0233944
14282	Fosb	ENSMUSG00000003545	2.75809	0.185244	2.51715	0.00109509	0.0234347
20847	Stat2	ENSMUSG00000040033	5.9063	6.31633	-0.409442	0.00109553	0.0234347
59027	Nampt	ENSMUSG00000020572	7.98326	8.55079	-0.567923	0.00109635	0.0234347
57874	Hacd3	ENSMUSG00000033629	9.36601	9.06345	0.302242	0.00110135	0.0235064
192663	Abcg4	ENSMUSG00000032131	5.23755	5.73023	-0.486841	0.0011038	0.0235236
16574	Kif5c	ENSMUSG00000026764	4.0497	4.46881	-0.411541	0.00110579	0.023531
68347	Mettl26	ENSMUSG00000025731	6.58234	6.98182	-0.400781	0.00111015	0.0235651
23792	Adam23	ENSMUSG00000025964	5.07412	4.48567	0.585009	0.00111069	0.0235651
103098	Slc6a15	ENSMUSG00000019894	4.31116	5.31515	-0.982406	0.00111882	0.0237025
16425	Itih2	ENSMUSG00000037254	4.98124	5.59313	-0.610668	0.0011288	0.0238723
223838	Adamts20	ENSMUSG00000022449	-0.0929312	-1.64217	1.53718	0.00113018	0.0238723
15001	H2-Oa	ENSMUSG00000024334	-1.38964	0.162565	-1.53603	0.00113647	0.0239698
16912	Psmb9	ENSMUSG00000096727	3.49951	4.24171	-0.736726	0.00114465	0.0241068
13008	Csrp2	ENSMUSG00000020186	6.08463	5.63299	0.452745	0.00115269	0.0242404
30785	Cttnbp2	ENSMUSG00000000416	7.16157	6.4769	0.686122	0.00116488	0.0244608
17754	Map1a	ENSMUSG00000027254	4.06685	4.46923	-0.401229	0.00117404	0.024598
15926	Idh1	ENSMUSG00000025950	9.33193	9.7454	-0.417614	0.00117486	0.024598
209760	Tmc7	ENSMUSG00000042246	0.931352	-0.597332	1.54295	0.00119907	0.0250683
16658	Mafb	ENSMUSG00000074622	3.75058	3.06977	0.697424	0.00120215	0.0250961
11520	Plin2	ENSMUSG00000028494	7.62888	8.10121	-0.473592	0.00120979	0.0251544
13048	Cux2	ENSMUSG00000042589	4.83663	4.23155	0.584111	0.00120981	0.0251544
103268	Cep57l1	ENSMUSG00000019813	3.61062	3.09338	0.523537	0.00121087	0.0251544
16776	Lama5	ENSMUSG00000015647	5.50091	4.85162	0.649098	0.00121198	0.0251544
27267	Cars	ENSMUSG00000010755	5.40873	4.94519	0.45974	0.00121969	0.0252364
68926	Ubap2	ENSMUSG00000028433	5.85341	5.56862	0.282597	0.0012214	0.0252364
215114	Hip1	ENSMUSG00000039959	5.36092	4.98251	0.376283	0.0012218	0.0252364
21391	Tbxas1	ENSMUSG00000029925	2.88286	3.32746	-0.447426	0.00122373	0.0252364
17919	Myo5b	ENSMUSG00000025885	3.92286	5.31154	-1.38619	0.00122476	0.0252364
12364	Casp12	ENSMUSG00000025887	6.38749	7.00343	-0.616366	0.00122844	0.0252758
72662	Dis3	ENSMUSG00000033166	4.79277	4.41151	0.381094	0.0012378	0.0254297
211389	Suox	ENSMUSG00000049858	5.14001	5.50669	-0.376281	0.00124304	0.0254297
208748	Prrg3	ENSMUSG00000033361	5.22692	4.67908	0.543864	0.00124461	0.0254297
16775	Lama4	ENSMUSG00000019846	6.30687	6.94163	-0.633103	0.0012451	0.0254297
13400	Dmpk	ENSMUSG00000030409	7.50081	6.72756	0.775906	0.00124653	0.0254297
380916	Lrch1	ENSMUSG00000068015	4.25021	3.89969	0.358828	0.00124659	0.0254297
69698	Slc52a3	ENSMUSG00000027463	0.279095	1.32886	-1.05241	0.00124957	0.0254543
279653	Pcdh19	ENSMUSG00000051323	3.84898	2.92106	0.931439	0.00125194	0.0254662
338365	Slc41a2	ENSMUSG00000034591	3.91128	3.19305	0.703392	0.00125476	0.0254873
13162	Slc6a3	ENSMUSG00000021609	0.0767185	-1.61201	1.74532	0.00125837	0.0255243
28000	Prpf19	ENSMUSG00000024735	7.95002	8.33079	-0.381889	0.00126379	0.025598
17101	Lyst	ENSMUSG00000019726	4.33266	4.7429	-0.4075	0.00126733	0.0256335
70209	Tmem143	ENSMUSG00000002781	5.13306	5.53741	-0.410828	0.00127527	0.0257543
100502624	Gm13483	ENSMUSG00000085862	-1.41651	-0.181022	-1.21759	0.00127691	0.0257543
69640	Fam83g	ENSMUSG00000042377	1.50884	2.06385	-0.548809	0.00127897	0.0257596
74152	Stra6l	ENSMUSG00000028327	-0.243288	0.886623	-1.12431	0.00128335	0.0258115
20524	Slc25a17	ENSMUSG00000022404	7.00632	6.40002	0.607946	0.00129585	0.0260128
53614	Reck	ENSMUSG00000028476	5.37659	4.93168	0.448539	0.001297	0.0260128
238988	Erc2	ENSMUSG00000040640	3.28115	3.92555	-0.63973	0.00129952	0.0260268
12667	Chrd	ENSMUSG00000006958	4.04378	4.7765	-0.727313	0.00130188	0.0260375
18746	Pkm	ENSMUSG00000032294	9.54401	9.18793	0.360224	0.00130535	0.0260451
210297	Lrch2	ENSMUSG00000031290	5.54033	4.82123	0.726683	0.00130723	0.0260451
12265	Ciita	ENSMUSG00000022504	1.25229	2.37222	-1.12503	0.00130833	0.0260451
17060	Blnk	ENSMUSG00000061132	0.461171	1.46657	-1.01066	0.00130954	0.0260451
76238	Grhpr	ENSMUSG00000035637	7.46119	7.13114	0.332005	0.00132267	0.0262697
66116	Nat8f1	ENSMUSG00000057103	5.32461	5.80054	-0.466975	0.00133205	0.0263411
74776	Ppa2	ENSMUSG00000028013	5.21262	4.87931	0.332825	0.00133265	0.0263411
66488	Fam136a	ENSMUSG00000057497	6.80542	7.18528	-0.380482	0.00133455	0.0263411
209387	Trim30d	ENSMUSG00000057596	0.304011	4.12396	-3.76985	0.00133459	0.0263411
107503	Atf5	ENSMUSG00000038539	5.53138	5.17674	0.357496	0.00133548	0.0263411
382051	Pdp2	ENSMUSG00000048371	4.94049	4.56162	0.368361	0.00134012	0.0263963
16188	Il3ra	ENSMUSG00000068758	2.40092	3.47284	-1.07137	0.00135108	0.0265629
67213	Cmtm6	ENSMUSG00000032434	7.08287	7.61819	-0.533761	0.00135702	0.0265629
17165	Mapkapk5	ENSMUSG00000029454	5.36694	5.08337	0.285405	0.0013574	0.0265629
67134	Nop56	ENSMUSG00000027405	6.34269	6.01741	0.32527	0.00135759	0.0265629
98314	D2hgdh	ENSMUSG00000073609	4.62416	5.09519	-0.473799	0.00135943	0.0265629
242506	Frmd3	ENSMUSG00000049122	-1.28958	0.195114	-1.46662	0.00136178	0.0265629
333639	Mamld1	ENSMUSG00000059401	4.38471	4.93269	-0.558851	0.00136324	0.0265629
53422	Ybx2	ENSMUSG00000018554	0.43654	-0.886709	1.30717	0.00136344	0.0265629
215476	Prr14l	ENSMUSG00000054280	5.91395	5.60839	0.305798	0.00136795	0.0266145
105727	Slc38a1	ENSMUSG00000023169	6.43265	6.03015	0.403172	0.00137093	0.0266362
69674	Mif4gd	ENSMUSG00000020743	6.55779	6.91358	-0.357392	0.00137608	0.0266838
14702	Gng2	ENSMUSG00000043004	4.72865	5.05804	-0.331126	0.00137735	0.0266838
94219	Cnnm2	ENSMUSG00000064105	4.8989	4.43748	0.462535	0.00137898	0.0266838
69771	1810019D21Rik	ENSMUSG00000086390	-0.894221	0.359878	-1.26599	0.0013831	0.0267275
15904	Id4	ENSMUSG00000021379	1.41362	0.100457	1.37902	0.00139862	0.0269028
67231	Tbc1d20	ENSMUSG00000027465	7.61134	7.36302	0.247193	0.00139888	0.0269028
74843	Mss51	ENSMUSG00000021815	0.199147	-0.903634	1.10703	0.00139955	0.0269028
54123	Irf7	ENSMUSG00000025498	4.46931	5.12581	-0.670339	0.0013997	0.0269028
320024	Nceh1	ENSMUSG00000027698	8.42675	8.79095	-0.369125	0.00140942	0.0270533
353172	Gars	ENSMUSG00000029777	6.46494	6.15716	0.307329	0.00141251	0.0270762
11522	Adh1	ENSMUSG00000074207	12.5129	12.8511	-0.337876	0.00142114	0.0271866
16419	Itgb5	ENSMUSG00000022817	8.40646	8.72162	-0.315574	0.00142207	0.0271866
100038882	Isg15	ENSMUSG00000035692	2.61029	3.55445	-0.969014	0.0014277	0.0272408
223646	Naprt	ENSMUSG00000022574	2.70342	3.2654	-0.566769	0.00142871	0.0272408
434402	Gm5617	ENSMUSG00000042293	2.7293	3.29422	-0.575029	0.00143522	0.027315
27405	Abcg3	ENSMUSG00000029299	0.683177	1.55456	-0.848127	0.00143738	0.027315
66573	Dzip1	ENSMUSG00000042156	4.73423	4.19155	0.543672	0.00143833	0.027315
64144	Mllt1	ENSMUSG00000024212	5.52632	5.23867	0.287951	0.00144246	0.0273536
19259	Ptpn5	ENSMUSG00000030854	-0.320612	-1.89365	1.53631	0.00144419	0.0273536
68982	1500015A07Rik	ENSMUSG00000098702	2.34174	3.16196	-0.811654	0.0014557	0.027535
23885	Gmcl1	ENSMUSG00000001157	4.95376	5.27284	-0.313732	0.00146492	0.0276729
71063	Zfp597	ENSMUSG00000039789	4.60849	5.04797	-0.429842	0.00147689	0.0278621
67652	Spaca1	ENSMUSG00000028264	0.671446	-0.749134	1.39847	0.00148159	0.0279141
13612	Edil3	ENSMUSG00000034488	2.98289	3.74812	-0.751669	0.00148644	0.0279279
18676	Phf2	ENSMUSG00000038025	6.1049	5.85435	0.249711	0.0014904	0.0279279
192654	Pla2g15	ENSMUSG00000031903	5.28978	5.53904	-0.251045	0.00149064	0.0279279
57442	Kcne3	ENSMUSG00000035165	0.445121	-0.868186	1.30136	0.00149299	0.0279279
225875	Lrfn4	ENSMUSG00000045045	3.13495	2.60325	0.532485	0.00149489	0.0279279
217303	Cd300a	ENSMUSG00000034652	1.57996	2.63187	-1.06354	0.001495	0.0279279
98402	Sh3bp4	ENSMUSG00000036206	5.31455	4.84001	0.47868	0.00149654	0.0279279
21923	Tnc	ENSMUSG00000028364	7.08522	6.30175	0.781136	0.00149918	0.0279279
53310	Dlg3	ENSMUSG00000000881	6.40532	6.13413	0.271715	0.0014999	0.0279279
19698	Relb	ENSMUSG00000002983	4.93015	4.50234	0.414671	0.00150982	0.0280759
74051	Steap2	ENSMUSG00000015653	7.38968	6.81124	0.580589	0.00151419	0.0281207
69202	Ptms	ENSMUSG00000030122	8.16666	7.78759	0.382503	0.00151743	0.0281293
69572	Mfsd3	ENSMUSG00000019080	3.79925	4.16215	-0.359205	0.00151859	0.0281293
67888	Tmem100	ENSMUSG00000069763	1.86082	0.928101	0.937211	0.00152702	0.028249
78785	Clip4	ENSMUSG00000024059	3.63644	4.04285	-0.398534	0.0015411	0.0284465
77975	Tmem50b	ENSMUSG00000022964	6.52293	6.77425	-0.251488	0.00154168	0.0284465
69478	2300009A05Rik	ENSMUSG00000032403	3.20371	3.72702	-0.508205	0.00154541	0.0284573
16871	Lhx3	ENSMUSG00000026934	0.631603	2.15348	-1.44794	0.00154822	0.0284573
545192	Baiap3	ENSMUSG00000047507	2.3664	4.01769	-1.63123	0.00154845	0.0284573
17476	Mpeg1	ENSMUSG00000046805	6.52654	7.11637	-0.592495	0.00155023	0.0284573
230103	Npr2	ENSMUSG00000028469	5.44368	5.09281	0.35049	0.00155329	0.0284771
66079	Tmem42	ENSMUSG00000066233	3.70194	4.03469	-0.339832	0.00155578	0.0284861
14375	Xrcc6	ENSMUSG00000022471	6.24334	6.5717	-0.32916	0.00155811	0.0284923
67619	Nob1	ENSMUSG00000003848	5.06842	4.75284	0.308744	0.00156582	0.0285966
18099	Nlk	ENSMUSG00000017376	6.20595	5.84486	0.363562	0.00157538	0.0287335
19672	Rcn1	ENSMUSG00000005973	8.53108	7.5681	0.963771	0.00157938	0.0287335
52850	Sgsm1	ENSMUSG00000042216	4.25758	4.67812	-0.423444	0.00158055	0.0287335
328092	Dtd2	ENSMUSG00000020956	4.46449	4.83663	-0.364575	0.00158135	0.0287335
319710	Frmd6	ENSMUSG00000048285	6.27424	5.66341	0.609238	0.00158368	0.0287337
382639	Zbtb42	ENSMUSG00000037638	3.38896	3.80863	-0.428578	0.00158538	0.0287337
71279	Slc29a3	ENSMUSG00000020100	5.69519	6.09342	-0.395937	0.00159342	0.028843
226421	Rab7b	ENSMUSG00000052688	2.84482	3.44652	-0.590863	0.00159601	0.0288533
108151	Sema3d	ENSMUSG00000040254	2.15811	2.75566	-0.605826	0.00159906	0.0288692
69368	Wdfy1	ENSMUSG00000073643	6.61048	5.2921	1.3258	0.00160276	0.0288692
12176	Bnip3	ENSMUSG00000078566	6.98974	7.53978	-0.553132	0.00160461	0.0288692
320701	Tafa4	ENSMUSG00000046500	1.41926	-0.416045	1.84176	0.00160685	0.0288692
69826	Ms4a10	ENSMUSG00000024731	3.58207	4.49965	-0.906098	0.00160698	0.0288692
20186	Nr1h4	ENSMUSG00000047638	5.15636	5.65148	-0.496882	0.0016324	0.0292694
73405	1700055D18Rik	ENSMUSG00000070997	-0.663049	0.182913	-0.845047	0.00163335	0.0292694
50934	Slc7a8	ENSMUSG00000022180	6.32812	6.79147	-0.463617	0.00164077	0.0293656
114874	Ddhd1	ENSMUSG00000037697	3.82707	4.24464	-0.434254	0.00165137	0.0295183
106633	Ift140	ENSMUSG00000024169	6.11867	5.73289	0.383504	0.00165589	0.029556
70567	Fra10ac1	ENSMUSG00000054237	3.64254	4.08287	-0.427969	0.00165762	0.029556
320404	Itpkb	ENSMUSG00000038855	6.61519	6.34084	0.274768	0.00166091	0.0295778
13136	Cd55	ENSMUSG00000026399	4.47558	5.17166	-0.687403	0.00166699	0.029649
242083	Ppm1l	ENSMUSG00000027784	5.7367	5.30604	0.430793	0.0016694	0.029649
67188	2700046G09Rik	ENSMUSG00000097787	2.33776	2.9187	-0.58647	0.00167112	0.029649
54614	Prpf40b	ENSMUSG00000023007	5.36843	5.00699	0.360779	0.00168779	0.0298812
69659	2310069G16Rik	ENSMUSG00000060530	-0.0157341	0.801804	-0.809279	0.00168839	0.0298812
227154	Stradb	ENSMUSG00000026027	5.00801	5.36101	-0.351642	0.00169823	0.0300182
217364	Engase	ENSMUSG00000033857	4.06114	4.5921	-0.517213	0.00171192	0.0302227
81907	Tmem108	ENSMUSG00000042757	2.06365	2.68471	-0.628695	0.00172731	0.0304569
17085	Ly9	ENSMUSG00000004707	1.06129	2.17358	-1.10386	0.00175145	0.0308445
81840	Sorcs2	ENSMUSG00000029093	5.39397	4.73988	0.658145	0.00176178	0.0309882
22385	Baz1b	ENSMUSG00000002748	7.49386	7.14304	0.351458	0.00176656	0.0310341
67205	Utp11	ENSMUSG00000028907	5.64821	5.3783	0.2684	0.00177298	0.0311087
15417	Hoxb9	ENSMUSG00000020875	8.39802	7.97467	0.42891	0.00177978	0.0311898
103655	Sec14l4	ENSMUSG00000019368	0.801974	1.98996	-1.15994	0.00179841	0.0314776
20351	Sema4a	ENSMUSG00000028064	2.99824	2.4886	0.519972	0.00180439	0.031539
67099	Mettl21a	ENSMUSG00000025956	4.49903	4.80159	-0.308024	0.00180632	0.031539
71648	Optn	ENSMUSG00000026672	6.62312	6.0417	0.580708	0.00180958	0.0315573
107587	Osr2	ENSMUSG00000022330	5.61688	5.21914	0.399148	0.0018181	0.0316673
17876	Myef2	ENSMUSG00000027201	5.16114	4.88045	0.287516	0.00182645	0.0317741
12161	Bmp6	ENSMUSG00000039004	1.95673	2.76716	-0.805351	0.00182978	0.0317932
17254	Slc3a2	ENSMUSG00000010095	7.98496	7.45041	0.540515	0.00183967	0.0318947
83922	Cep41	ENSMUSG00000029790	3.87859	3.41979	0.449135	0.00184008	0.0318947
20623	Snrk	ENSMUSG00000038145	6.96412	6.6888	0.276874	0.00184641	0.0319657
109676	Ank2	ENSMUSG00000032826	5.13635	5.50857	-0.378767	0.00185041	0.0319962
242377	Pm20d2	ENSMUSG00000054659	2.94223	3.69458	-0.727711	0.00186226	0.0321623
18129	Notch2	ENSMUSG00000027878	6.01254	6.39493	-0.382927	0.00186598	0.0321877
244238	Mrgpre	ENSMUSG00000048965	1.90187	2.49584	-0.578247	0.00187024	0.0322129
331474	Rtl5	ENSMUSG00000049191	3.87201	4.26292	-0.389611	0.00187195	0.0322129
75909	Vmp1	ENSMUSG00000018171	7.13691	7.51735	-0.380112	0.00187494	0.0322256
21873	Tjp2	ENSMUSG00000024812	3.89531	3.52243	0.385832	0.00188702	0.0323942
320394	Cenpt	ENSMUSG00000036672	3.10871	2.60032	0.498498	0.00189064	0.0324174
215335	Slc36a1	ENSMUSG00000020261	4.71167	5.0788	-0.36746	0.00189618	0.0324569
108167606	Gm2710	ENSMUSG00000060128	4.18497	4.57341	-0.399966	0.00189748	0.0324569
17187	Max	ENSMUSG00000059436	5.8894	5.61959	0.269234	0.00190335	0.032489
19057	Ppp3cc	ENSMUSG00000022092	3.74933	4.16283	-0.415836	0.0019039	0.032489
17196	Mbp	ENSMUSG00000041607	3.85858	4.30218	-0.449196	0.00193995	0.0330613
12927	Bcar1	ENSMUSG00000031955	6.50149	6.17408	0.327285	0.00194268	0.0330613
235300	Tlcd5	ENSMUSG00000048503	3.60523	3.2279	0.382806	0.00194437	0.0330613
67749	Mgarp	ENSMUSG00000037161	9.74918	10.3242	-0.577779	0.00195299	0.0331684
67149	Nkain1	ENSMUSG00000078532	2.57568	2.05563	0.513336	0.00196717	0.0333695
15013	H2-Q2	ENSMUSG00000091705	0.948983	-1.59549	2.57061	0.00197215	0.0333972
72281	Sh2d4a	ENSMUSG00000053886	3.07188	3.66187	-0.569505	0.00197347	0.0333972
77604	Rbm12b2	ENSMUSG00000052137	3.30155	2.60417	0.666039	0.00198045	0.0334464
17118	Marcks	ENSMUSG00000069662	6.03029	6.56207	-0.529488	0.00198117	0.0334464
67707	Mrpl24	ENSMUSG00000019710	6.64617	6.9544	-0.307779	0.00198339	0.0334464
19264	Ptprc	ENSMUSG00000026395	3.76394	4.24262	-0.474103	0.00198938	0.0335078
269951	Idh2	ENSMUSG00000030541	7.30392	7.04284	0.261118	0.00199331	0.0335345
28113	Tinf2	ENSMUSG00000007589	5.07308	4.47188	0.592685	0.00199703	0.0335577
16416	Itgb3	ENSMUSG00000020689	3.45615	2.83991	0.598725	0.00201279	0.0337828
83701	Srrt	ENSMUSG00000037364	6.38519	6.09938	0.285137	0.00201645	0.0338046
19263	Ptprb	ENSMUSG00000020154	5.8814	6.15212	-0.271179	0.00202015	0.0338269
107029	Me2	ENSMUSG00000024556	4.37406	4.69589	-0.326957	0.00202324	0.0338325
20475	Six5	ENSMUSG00000040841	4.59798	4.30255	0.288212	0.00202752	0.0338325
268395	Mpg	ENSMUSG00000020287	4.6537	5.0711	-0.423794	0.00202884	0.0338325
217935	Dync2i1	ENSMUSG00000042050	4.43416	4.05791	0.367618	0.00202995	0.0338325
109801	Glo1	ENSMUSG00000024026	6.68891	6.1554	0.533222	0.0020341	0.0338427
50918	Myadm	ENSMUSG00000068566	6.90465	6.62458	0.280761	0.0020353	0.0338427
15950	Ifi203	ENSMUSG00000039997	3.92634	4.49277	-0.552195	0.00204096	0.0338975
225849	Ppp2r5b	ENSMUSG00000024777	6.65736	6.36111	0.296099	0.00205645	0.0341045
234311	Ddx60	ENSMUSG00000037921	3.37731	4.04959	-0.674399	0.00205819	0.0341045
114142	Foxp2	ENSMUSG00000029563	3.18501	2.57289	0.617286	0.00206458	0.0341429
73430	Zfp974	ENSMUSG00000070709	3.1562	3.63945	-0.471414	0.00206541	0.0341429
74411	Plpp6	ENSMUSG00000040105	5.22632	5.5923	-0.362172	0.00206768	0.0341429
80981	Arl4d	ENSMUSG00000034936	3.41104	2.72234	0.719034	0.00207352	0.0341838
68526	Gpr155	ENSMUSG00000041762	3.38606	3.81368	-0.42927	0.00207493	0.0341838
70358	Steap1	ENSMUSG00000015652	5.31699	4.40421	0.896895	0.00208865	0.0343701
75991	Slain2	ENSMUSG00000036087	6.46249	6.18951	0.273979	0.00209509	0.0344302
18574	Pde1b	ENSMUSG00000022489	2.56408	3.13841	-0.572816	0.00209711	0.0344302
209086	Samd9l	ENSMUSG00000047735	4.17257	5.27542	-1.05039	0.00209967	0.0344326
319581	Xkr5	ENSMUSG00000039814	1.2282	0.149314	1.0832	0.00210676	0.0345093
26875	Pclo	ENSMUSG00000061601	4.12512	4.68147	-0.573011	0.00211125	0.0345123
15473	Rida	ENSMUSG00000022323	4.58708	4.97835	-0.384163	0.00211177	0.0345123
18124	Nr4a3	ENSMUSG00000028341	6.73243	5.60898	1.12051	0.00212876	0.0347118
140887	Lnx2	ENSMUSG00000016520	4.51436	4.1029	0.402854	0.00212883	0.0347118
54447	Asah2	ENSMUSG00000024887	5.5663	5.88146	-0.31244	0.00213553	0.0347199
11529	Adh7	ENSMUSG00000055301	7.89408	9.21017	-1.3056	0.00213657	0.0347199
54396	Irgm2	ENSMUSG00000069874	5.00851	5.64022	-0.642332	0.00213661	0.0347199
69163	Mrpl44	ENSMUSG00000026248	5.65803	5.92484	-0.264513	0.00213964	0.0347296
104079	Nxph3	ENSMUSG00000046719	1.63289	0.568338	1.04953	0.00214585	0.0347911
231214	Cc2d2a	ENSMUSG00000039765	4.96377	5.33472	-0.375142	0.00214977	0.0348151
16653	Kras	ENSMUSG00000030265	5.65877	5.24162	0.419362	0.00215541	0.034867
80837	Rhoj	ENSMUSG00000046768	4.51	4.01596	0.517221	0.00216912	0.0350491
50799	Slc25a13	ENSMUSG00000015112	4.70098	5.15768	-0.443307	0.00217834	0.035112
22339	Vegfa	ENSMUSG00000023951	8.49723	7.92528	0.582248	0.00218191	0.035112
100039795	Ildr2	ENSMUSG00000040612	2.4852	-2.73963	5.21338	0.00218275	0.035112
74168	Zdhhc16	ENSMUSG00000025157	4.46824	4.1664	0.30224	0.00218284	0.035112
269643	Ppp2r2c	ENSMUSG00000029120	3.25583	3.71782	-0.461086	0.00218618	0.0351262
226849	Ppp2r5a	ENSMUSG00000026626	6.27504	6.01404	0.261774	0.00220646	0.035378
78908	Igsf3	ENSMUSG00000042035	3.1363	2.65489	0.494262	0.00220679	0.035378
73067	Tmem192	ENSMUSG00000025521	5.44788	5.81328	-0.366427	0.0022106	0.0353993
29858	Pmm1	ENSMUSG00000022474	5.47676	6.14218	-0.662786	0.00221546	0.0354375
73750	Whrn	ENSMUSG00000039137	5.37612	4.93617	0.432377	0.0022276	0.0355864
58859	Efemp2	ENSMUSG00000024909	5.97766	5.59908	0.373865	0.00222975	0.0355864
54324	Arhgef5	ENSMUSG00000033542	5.73068	5.47833	0.251966	0.00225284	0.0358815
21385	Tbx2	ENSMUSG00000000093	5.1715	4.59368	0.583934	0.00225326	0.0358815
69137	Vstm5	ENSMUSG00000031937	0.15623	0.856155	-0.703146	0.00226576	0.0360405
14763	Gpr37	ENSMUSG00000039904	-1.57159	0.266373	-1.88034	0.00227178	0.0360787
12390	Cav2	ENSMUSG00000000058	5.77275	6.29749	-0.518533	0.00227321	0.0360787
212514	Spice1	ENSMUSG00000043065	4.80161	4.49776	0.303567	0.00228327	0.0361916
72865	Rtl8c	ENSMUSG00000051851	6.49273	6.15924	0.333151	0.00228729	0.0361916
52276	Cdca8	ENSMUSG00000028873	2.09756	1.29706	0.785947	0.00228792	0.0361916
224273	Crybg3	ENSMUSG00000022723	4.40204	3.97929	0.431356	0.00229464	0.0362101
71781	Slc16a14	ENSMUSG00000026220	-1.59992	0.598821	-2.14332	0.00229616	0.0362101
67832	Brix1	ENSMUSG00000022247	6.11649	5.82711	0.288163	0.00229668	0.0362101
107321	Lpxn	ENSMUSG00000024696	1.57301	2.22294	-0.642879	0.00231793	0.0365048
216766	Gemin5	ENSMUSG00000037275	5.89546	5.53077	0.363023	0.00232247	0.0365361
70024	Mcm10	ENSMUSG00000026669	1.64027	0.847371	0.803527	0.00232639	0.0365575
17974	Nck2	ENSMUSG00000066877	4.90827	4.59761	0.31522	0.00234165	0.0367473
414077	Wdr83os	ENSMUSG00000059355	5.36031	5.67065	-0.311213	0.0023436	0.0367473
14208	Ppm1g	ENSMUSG00000029147	6.65871	6.33585	0.3229	0.00234904	0.0367922
114716	Spred2	ENSMUSG00000045671	5.2066	4.77776	0.425938	0.00236342	0.0369769
71785	Pdgfd	ENSMUSG00000032006	6.65388	7.02444	-0.37082	0.00237676	0.0371181
13860	Eps8	ENSMUSG00000015766	4.84388	5.48013	-0.641221	0.00237763	0.0371181
240633	Lipk	ENSMUSG00000024771	-0.435226	1.52789	-1.89118	0.00238767	0.0372341
107448	Unc5a	ENSMUSG00000025876	3.65196	4.09567	-0.449912	0.00242082	0.0375691
18105	Nqo2	ENSMUSG00000046949	6.40326	6.68105	-0.277401	0.00242265	0.0375691
228536	Bahd1	ENSMUSG00000040007	5.6206	6.0119	-0.386771	0.00242461	0.0375691
16513	Kcnj10	ENSMUSG00000044708	2.04414	2.59366	-0.547063	0.00242491	0.0375691
667803	H2-T-ps	ENSMUSG00000073405	0.147014	-1.16344	1.30211	0.00242515	0.0375691
80914	Uck2	ENSMUSG00000026558	4.84269	4.3302	0.50027	0.00242535	0.0375691
11676	Aldoc	ENSMUSG00000017390	4.55385	5.16054	-0.607651	0.00242754	0.0375691
12874	Cpd	ENSMUSG00000020841	6.4638	6.7063	-0.242084	0.0024395	0.0377021
115487534	Gm24119	ENSMUSG00000077167	0.716728	-0.695308	1.3928	0.00244271	0.0377021
68539	Tmem109	ENSMUSG00000034659	7.67905	8.01125	-0.331013	0.00244404	0.0377021
434130	Ccdc8	ENSMUSG00000041117	6.03509	5.58163	0.451514	0.00245086	0.0377665
67065	Polr3d	ENSMUSG00000000776	4.21396	3.77608	0.423726	0.00246755	0.0379827
14230	Fkbp10	ENSMUSG00000001555	4.58075	4.1494	0.427977	0.00247082	0.0379922
11534	Adk	ENSMUSG00000039197	6.93349	6.57242	0.36213	0.00248389	0.0381521
219131	Phf11a	ENSMUSG00000044703	-1.96123	-0.115272	-1.82727	0.00250311	0.0384061
13120	Cyp4b1	ENSMUSG00000028713	4.97895	5.41161	-0.428132	0.00253015	0.0387552
109168	Atl3	ENSMUSG00000024759	7.93693	8.26269	-0.327996	0.00253129	0.0387552
101543	Wtip	ENSMUSG00000036459	4.23576	3.76612	0.477361	0.00253409	0.0387567
667014	Gm8420	ENSMUSG00000072324	-2.63998	3.05924	-5.81191	0.00253859	0.038784
13017	Ctbp2	ENSMUSG00000030970	5.58525	5.31483	0.270955	0.00254446	0.0388322
67738	Ppid	ENSMUSG00000027804	6.2555	5.9732	0.282407	0.00255698	0.0389552
17268	Meis1	ENSMUSG00000020160	5.5156	5.28075	0.234326	0.00256339	0.0389552
100952	Emilin1	ENSMUSG00000029163	5.43109	5.86362	-0.433676	0.00256407	0.0389552
78894	Aacs	ENSMUSG00000029482	6.09344	6.66543	-0.574037	0.00256432	0.0389552
27359	Sytl4	ENSMUSG00000031255	4.91665	4.51469	0.391752	0.00256614	0.0389552
56317	Anapc7	ENSMUSG00000029466	6.04963	5.82923	0.219677	0.00257315	0.0390202
73991	Atl1	ENSMUSG00000021066	2.6662	3.13671	-0.462909	0.00258381	0.0391403
16554	Kif13b	ENSMUSG00000060012	5.60571	5.93079	-0.325497	0.00259106	0.0392086
103850	Nt5m	ENSMUSG00000032615	4.57264	4.89151	-0.320091	0.00259934	0.0392923
52874	Pum3	ENSMUSG00000041360	6.4291	6.1163	0.312523	0.0026074	0.0393726
269033	4930503L19Rik	ENSMUSG00000044906	2.07846	2.59748	-0.51799	0.00261498	0.0394454
107071	Wdr74	ENSMUSG00000042729	5.13115	4.8482	0.282713	0.00262322	0.039528
29861	Dpf1	ENSMUSG00000030584	1.16233	1.78484	-0.627117	0.00262947	0.0395805
12326	Camk4	ENSMUSG00000038128	3.01652	2.27786	0.726134	0.00264286	0.0397073
24136	Zeb2	ENSMUSG00000026872	6.85374	7.09922	-0.245499	0.00264345	0.0397073
14677	Gnai1	ENSMUSG00000057614	4.60729	5.30677	-0.714461	0.00264902	0.0397184
244144	Usp35	ENSMUSG00000035713	3.95649	3.43805	0.51432	0.00264975	0.0397184
12424	Cck	ENSMUSG00000032532	-1.67726	-0.266546	-1.41619	0.00265534	0.0397605
67087	Ctnnbip1	ENSMUSG00000028988	4.93255	5.48578	-0.545381	0.00265988	0.0397868
56794	Hacl1	ENSMUSG00000021884	4.76697	5.13175	-0.363517	0.00266335	0.0397971
269061	Cpsf7	ENSMUSG00000034820	5.92292	5.64373	0.277258	0.00267899	0.0399891
268721	Zswim8	ENSMUSG00000021819	6.94896	6.61715	0.332456	0.00269821	0.0402031
215512	Fam117a	ENSMUSG00000038893	4.18104	3.77422	0.412142	0.00270083	0.0402031
16008	Igfbp2	ENSMUSG00000039323	1.68186	0.946503	0.747288	0.00270176	0.0402031
319991	Kif6	ENSMUSG00000023999	0.265763	-0.963043	1.19479	0.00272236	0.0404675
50876	Tmod2	ENSMUSG00000032186	4.11347	4.46127	-0.350493	0.00273066	0.0405487
76781	Mettl4	ENSMUSG00000055660	3.32815	3.73407	-0.401081	0.00273582	0.0405718
52463	Tet1	ENSMUSG00000047146	1.82923	2.58013	-0.740671	0.00273789	0.0405718
67217	L3hypdh	ENSMUSG00000019718	4.84159	5.24063	-0.394407	0.00275028	0.0406725
242466	Zfp462	ENSMUSG00000060206	5.83238	5.36347	0.465072	0.00275037	0.0406725
54399	Bet1l	ENSMUSG00000025484	5.67932	6.03705	-0.35577	0.00275804	0.0407438
64385	Cyp4f14	ENSMUSG00000024292	3.38122	4.11944	-0.749326	0.00276559	0.0408132
21849	Trim28	ENSMUSG00000005566	7.31862	7.08365	0.236348	0.00277012	0.0408378
72350	Zc2hc1c	ENSMUSG00000045064	2.47352	1.96953	0.495249	0.00277313	0.0408401
16918	Mycl	ENSMUSG00000028654	-0.708963	0.614844	-1.3474	0.0027849	0.0409712
84004	Mcam	ENSMUSG00000032135	5.12026	4.85355	0.267589	0.00279152	0.0410264
231050	Galnt11	ENSMUSG00000038072	6.35036	5.9464	0.404538	0.00279605	0.0410509
66795	Atg10	ENSMUSG00000021619	3.66358	4.11951	-0.446864	0.00280815	0.0411863
14266	Aff2	ENSMUSG00000031189	0.735669	1.58748	-0.852577	0.00282388	0.0413745
52696	Zwint	ENSMUSG00000019923	7.93337	7.69192	0.241072	0.00283013	0.0414236
231238	Sel1l3	ENSMUSG00000029189	2.85333	2.21791	0.652477	0.00283969	0.0415211
67725	Nudt13	ENSMUSG00000021809	4.71608	5.00278	-0.289262	0.00285364	0.0416825
239570	Ttc38	ENSMUSG00000035944	4.62938	5.08679	-0.46941	0.00285847	0.0417103
14814	Grin2d	ENSMUSG00000002771	0.795794	0.047879	0.747383	0.00288729	0.042088
212980	Slc45a3	ENSMUSG00000026435	4.95095	4.33408	0.631337	0.00289361	0.0421371
228361	Ambra1	ENSMUSG00000040506	5.83065	5.55993	0.268327	0.00291142	0.0423533
11744	Anxa11	ENSMUSG00000021866	4.80533	4.41611	0.386754	0.0029214	0.0424444
17169	Mark3	ENSMUSG00000007411	6.42452	6.19097	0.233665	0.00292481	0.0424444
228413	Prrg4	ENSMUSG00000027171	2.31384	1.76444	0.557596	0.00292658	0.0424444
52685	Cd300lg	ENSMUSG00000017309	5.38069	5.82938	-0.448772	0.00293955	0.0424954
100039796	Tgtp2	ENSMUSG00000078921	0.40617	1.51701	-1.11418	0.00293956	0.0424954
70240	Ufsp1	ENSMUSG00000051502	2.78398	3.18309	-0.3934	0.00294091	0.0424954
74516	A730049H05Rik	ENSMUSG00000048636	2.10499	3.1349	-1.05243	0.00294199	0.0424954
20661	Sort1	ENSMUSG00000068747	5.44051	5.18158	0.261529	0.00294767	0.0425171
216456	Gls2	ENSMUSG00000044005	1.43053	0.437958	0.97408	0.00294944	0.0425171
216527	Ccm2	ENSMUSG00000000378	4.76639	4.45081	0.314545	0.00295258	0.0425195
19276	Ptprn2	ENSMUSG00000056553	5.48736	5.83476	-0.348519	0.00295657	0.0425342
212167	Gsap	ENSMUSG00000039934	2.95008	2.44947	0.515936	0.0029663	0.0426312
11307	Abcg1	ENSMUSG00000024030	3.69175	4.14442	-0.438054	0.00297534	0.0427001
67283	Slc25a19	ENSMUSG00000020744	5.15685	5.51559	-0.359076	0.00297985	0.0427001
22323	Vasp	ENSMUSG00000030403	5.57708	5.28285	0.293433	0.00298005	0.0427001
72759	Tmem135	ENSMUSG00000039428	6.73393	6.99593	-0.261317	0.00299144	0.0427504
20496	Slc12a2	ENSMUSG00000024597	7.25619	6.68472	0.574349	0.00299244	0.0427504
245867	Pcmtd2	ENSMUSG00000027589	6.81017	7.10525	-0.297356	0.00299253	0.0427504
105651	Ppp1r3e	ENSMUSG00000072494	2.00976	2.64007	-0.632856	0.00299565	0.0427524
19894	Rph3a	ENSMUSG00000029608	3.069	3.51757	-0.467263	0.00301302	0.0429574
16777	Lamb1	ENSMUSG00000002900	7.99666	7.69546	0.300685	0.00303588	0.0431974
56375	B4galt4	ENSMUSG00000022793	4.1776	3.8308	0.342394	0.0030359	0.0431974
218989	Tmem260	ENSMUSG00000036339	5.57851	5.95348	-0.376225	0.00304091	0.0432257
229905	Kyat3	ENSMUSG00000040213	4.11248	4.4948	-0.383153	0.00304534	0.0432457
18189	Nrxn1	ENSMUSG00000024109	4.03523	4.58733	-0.560305	0.00305549	0.0432663
99375	Cul4a	ENSMUSG00000031446	8.03594	8.34556	-0.310291	0.00305631	0.0432663
230787	Themis2	ENSMUSG00000037731	1.33798	2.05092	-0.688682	0.00305659	0.0432663
18081	Ninj1	ENSMUSG00000037966	5.54334	5.2578	0.284235	0.00305892	0.0432663
107771	Bmyc	ENSMUSG00000049086	4.57305	5.02196	-0.447982	0.00306193	0.0432663
230857	Ece1	ENSMUSG00000057530	7.61063	8.04138	-0.427354	0.00307589	0.0434208
71912	Jsrp1	ENSMUSG00000020216	2.33907	1.61943	0.741261	0.00308368	0.0434494
14133	Fcna	ENSMUSG00000026938	1.45398	0.606688	0.827806	0.00308869	0.0434494
11812	Apoc1	ENSMUSG00000040564	7.09525	9.13039	-2.0113	0.00308992	0.0434494
75458	Cklf	ENSMUSG00000054400	4.9656	5.31891	-0.349611	0.00309092	0.0434494
27528	Nrep	ENSMUSG00000042834	8.7157	9.27815	-0.565904	0.00309311	0.0434494
381085	Tbc1d22b	ENSMUSG00000042203	5.12964	4.78926	0.336101	0.00311116	0.043631
56356	Gltp	ENSMUSG00000011884	5.39482	5.80856	-0.416556	0.00311233	0.043631
16923	Sh2b3	ENSMUSG00000042594	5.33578	5.62601	-0.287899	0.00311519	0.043631
16195	Il6st	ENSMUSG00000021756	9.30159	8.96511	0.335307	0.00312157	0.0436583
66158	Rtl8a	ENSMUSG00000067925	4.0103	3.55065	0.439711	0.00312427	0.0436583
227526	Cdnf	ENSMUSG00000039496	2.17775	2.71314	-0.517831	0.00312806	0.0436583
268297	Scml4	ENSMUSG00000044770	2.96242	2.37519	0.582494	0.00312936	0.0436583
18211	Ntrk1	ENSMUSG00000028072	3.59107	4.18396	-0.601169	0.00314176	0.0437887
67038	Ly6m	ENSMUSG00000063522	3.41641	1.16783	2.24491	0.00314638	0.0437919
246727	Oas3	ENSMUSG00000032661	-0.0220819	0.896215	-0.916306	0.00314816	0.0437919
20716	Serpina3n	ENSMUSG00000021091	4.18774	2.79421	1.43665	0.00315118	0.0437919
16815	Lbx2	ENSMUSG00000034968	2.44302	3.03396	-0.579553	0.00317249	0.044
73724	Mcee	ENSMUSG00000033429	4.5856	5.00503	-0.416533	0.00317515	0.044
227929	Cytip	ENSMUSG00000026832	4.98776	4.55978	0.427984	0.00317538	0.044
12514	Cd68	ENSMUSG00000018774	4.03473	4.81707	-0.778302	0.00318446	0.044083
76681	Trim12a	ENSMUSG00000066258	-1.09613	3.2725	-4.28153	0.00319844	0.0442086
74552	Nipal3	ENSMUSG00000028803	4.34073	4.79525	-0.449848	0.00319971	0.0442086
16414	Itgb2	ENSMUSG00000000290	3.71047	4.23953	-0.546633	0.00325072	0.04487
19204	Ptafr	ENSMUSG00000056529	0.984773	2.00802	-1.01694	0.00325901	0.044941
105245	Txndc5	ENSMUSG00000038991	8.50747	8.83622	-0.332278	0.00327341	0.0450642
16709	Ktn1	ENSMUSG00000021843	6.38841	6.0832	0.305052	0.00327424	0.0450642
170757	Adgrl4	ENSMUSG00000039167	5.97532	6.30913	-0.333265	0.00327808	0.0450736
110639	Prps2	ENSMUSG00000025742	5.76285	6.08317	-0.318991	0.00328495	0.0451247
52637	Cisd1	ENSMUSG00000037710	5.41268	5.68368	-0.275347	0.00329418	0.045208
65115	Bean1	ENSMUSG00000031872	2.91242	1.95233	0.95531	0.00329754	0.0452108
70082	Lysmd2	ENSMUSG00000032184	3.86087	3.50439	0.362046	0.00330368	0.0452515
71776	Tha1	ENSMUSG00000017713	3.70922	4.14581	-0.440097	0.00332112	0.0454469
81905	Cacng8	ENSMUSG00000053395	0.339973	-0.783238	1.10595	0.00334855	0.0457364
68369	0610031O16Rik	ENSMUSG00000099146	-1.37886	-0.383083	-1.02163	0.00334867	0.0457364
23984	Pde10a	ENSMUSG00000023868	5.35522	4.44852	0.896034	0.00335784	0.0458178
210293	Dock10	ENSMUSG00000038608	5.09276	5.45832	-0.366414	0.0033679	0.0459113
338350	Acad12	ENSMUSG00000042647	3.62079	4.10937	-0.492851	0.00338043	0.0460382
240328	F830016B08Rik	ENSMUSG00000090942	-1.70823	-0.237046	-1.48353	0.00339166	0.0461473
69519	Rwdd2a	ENSMUSG00000032417	3.31565	3.93588	-0.622414	0.0034057	0.0462942
71817	Tmem50a	ENSMUSG00000028822	8.35809	8.70122	-0.346472	0.00341402	0.0463404
208151	Tmem132b	ENSMUSG00000070498	3.0471	3.64734	-0.604912	0.00341572	0.0463404
212706	N4bp3	ENSMUSG00000001053	3.21904	2.79498	0.409787	0.00341882	0.0463404
14555	Gpd1	ENSMUSG00000023019	8.88474	7.89274	0.996781	0.00342702	0.0464075
13805	Eng	ENSMUSG00000026814	6.2898	6.62133	-0.331903	0.00344363	0.0465884
56774	Slc6a14	ENSMUSG00000031089	0.621319	-0.629758	1.25308	0.00345663	0.0467201
16391	Irf9	ENSMUSG00000002325	5.46702	5.95895	-0.493687	0.00346366	0.0467709
74322	Cxxc1	ENSMUSG00000024560	5.88025	5.64199	0.235891	0.00346787	0.0467835
217410	Trib2	ENSMUSG00000020601	4.59193	4.21264	0.378279	0.00347343	0.0468144
387191	Mir196a-1	ENSMUSG00000065546	2.44394	1.74551	0.704925	0.00348472	0.0469139
446101	Xrra1	ENSMUSG00000035211	2.92123	3.76991	-0.823892	0.00348737	0.0469139
67916	Plpp3	ENSMUSG00000028517	8.7733	9.18638	-0.413437	0.00350345	0.0470858
27279	Tnfrsf12a	ENSMUSG00000023905	6.09836	5.70908	0.388034	0.00351032	0.0471339
12833	Col6a1	ENSMUSG00000001119	8.8313	9.47637	-0.646172	0.0035154	0.0471578
218699	Pxk	ENSMUSG00000033885	6.27864	6.00601	0.272191	0.00352873	0.0472616
545030	Wdfy4	ENSMUSG00000051506	2.21658	2.93803	-0.72496	0.00352975	0.0472616
13733	Adgre1	ENSMUSG00000004730	3.37861	4.09654	-0.721468	0.00354797	0.0474612
433931	Pigg	ENSMUSG00000029263	5.13628	5.43403	-0.297003	0.00355693	0.0474868
384179	Gm5292	ENSMUSG00000059565	-2.74386	1.53264	-4.32888	0.00355751	0.0474868
12009	Cep131	ENSMUSG00000039781	5.74137	6.37945	-0.638242	0.00356241	0.0474868
382062	AB124611	ENSMUSG00000057191	0.740639	1.5583	-0.802924	0.00356317	0.0474868
54383	Phc2	ENSMUSG00000028796	6.3882	6.04677	0.340936	0.00357838	0.0476207
100034251	Wfdc17	ENSMUSG00000069792	-0.418493	1.37176	-1.76471	0.00357988	0.0476207
230027	Coq3	ENSMUSG00000028247	4.7973	5.14437	-0.34327	0.00358475	0.0476412
217310	Hid1	ENSMUSG00000034586	5.42221	4.69011	0.719732	0.00358931	0.0476575
171282	Acot4	ENSMUSG00000052392	1.77061	0.801544	1.00275	0.00360147	0.0477745
100504121	Med9os	ENSMUSG00000085260	-0.231156	0.587432	-0.812289	0.00361832	0.0479536
70052	Prpf4	ENSMUSG00000066148	6.35178	6.07868	0.273271	0.00362369	0.0479804
229534	Pbxip1	ENSMUSG00000042613	6.86117	6.60071	0.260525	0.00363308	0.0480176
68796	Tmem214	ENSMUSG00000038828	6.14625	5.92826	0.217334	0.00363322	0.0480176
12504	Cd4	ENSMUSG00000023274	-1.0334	0.179345	-1.20319	0.00363781	0.0480339
106618	Wdr90	ENSMUSG00000073434	4.54249	4.02813	0.504655	0.0036434	0.048054
230073	Rigi	ENSMUSG00000040296	6.31752	6.6962	-0.377732	0.00364861	0.048054
76551	Ccdc6	ENSMUSG00000048701	5.86071	5.43507	0.4196	0.00365581	0.048054
100039542	Tbx3os1	ENSMUSG00000087516	4.41451	3.96333	0.434647	0.00365626	0.048054
223254	Farp1	ENSMUSG00000025555	4.56375	4.15822	0.415958	0.00365942	0.048054
213742	Xist	ENSMUSG00000086503	8.65353	9.07087	-0.418791	0.0036595	0.048054
70796	Zdhhc1	ENSMUSG00000039199	4.66828	4.35728	0.30815	0.00367997	0.0482785
17872	Ppp1r15a	ENSMUSG00000040435	5.36788	4.81587	0.535276	0.00371415	0.0486823
207683	Igsf11	ENSMUSG00000022790	3.23169	4.21342	-0.976419	0.00372712	0.0488076
227094	Nemp2	ENSMUSG00000043015	2.79356	2.32033	0.47788	0.00373396	0.0488524
21687	Tek	ENSMUSG00000006386	6.39075	6.6632	-0.272958	0.00374109	0.0488627
20528	Slc2a4	ENSMUSG00000018566	4.25444	3.53227	0.71599	0.00374247	0.0488627
16542	Kdr	ENSMUSG00000062960	7.11072	7.3869	-0.276956	0.003745	0.0488627
12523	Cd84	ENSMUSG00000038147	2.38817	3.13155	-0.73381	0.00375007	0.0488819
12273	C5ar1	ENSMUSG00000049130	1.15661	1.85943	-0.704874	0.00375331	0.0488819
14187	Akr1b8	ENSMUSG00000029762	7.56326	7.27439	0.291287	0.00378504	0.0492503
50492	Thop1	ENSMUSG00000004929	6.00226	5.60962	0.388712	0.00379116	0.0492851
26568	Slc27a3	ENSMUSG00000027932	7.64247	7.36353	0.278361	0.00381366	0.0495325
235533	Gk5	ENSMUSG00000041440	3.60913	3.27289	0.33813	0.00382146	0.0495889
19302	Pex2	ENSMUSG00000040374	6.63178	6.93974	-0.308575	0.00383171	0.0496768
209966	Pgbd5	ENSMUSG00000050751	3.38802	3.9427	-0.538036	0.00385671	0.0499489
20339	Sele	ENSMUSG00000026582	2.96563	2.15925	0.852804	0.0038611	0.0499489
170741	Pilrb1	ENSMUSG00000066684	-1.49163	-0.579287	-0.905107	0.00386604	0.0499489
629147	Ctxn3	ENSMUSG00000069372	6.30009	5.5248	0.783627	0.00386825	0.0499489
12055	Bcl7c	ENSMUSG00000030814	4.397	4.76814	-0.370873	0.00387276	0.0499489
12607	Cebpz	ENSMUSG00000024081	6.62923	6.38577	0.244068	0.00387983	0.0499489
12224	Klf5	ENSMUSG00000005148	2.18558	1.49308	0.730974	0.00388242	0.0499489
16572	Kif5a	ENSMUSG00000074657	4.01957	4.55589	-0.525382	0.00388277	0.0499489
338372	Map3k9	ENSMUSG00000042724	2.55248	3.09552	-0.531725	0.00388624	0.0499489
67178	Zmat5	ENSMUSG00000009076	4.75279	5.03335	-0.280209	0.00389062	0.0499489
77318	Ankrd55	ENSMUSG00000049985	2.10524	3.51181	-1.40814	0.00389113	0.0499489
72190	2510009E07Rik	ENSMUSG00000043391	5.09728	5.33858	-0.23883	0.00389736	0.0499691
50915	Grb14	ENSMUSG00000026888	4.99657	4.54946	0.454999	0.00390347	0.0499691
68259	Ift80	ENSMUSG00000027778	5.84219	5.45877	0.383395	0.00390429	0.0499691
22763	Zfr	ENSMUSG00000022201	7.52603	7.20626	0.319773	0.00390668	0.0499691
77022	2700099C18Rik	ENSMUSG00000098090	-0.00401439	-0.979294	0.986615	0.00391745	0.0500621
26363	Btd	ENSMUSG00000021900	6.06143	6.30835	-0.248347	0.00393429	0.0502325
69747	Zswim7	ENSMUSG00000014243	3.05188	3.52369	-0.472364	0.0039595	0.0505092
76789	Mzt1	ENSMUSG00000033186	5.72742	6.19304	-0.45962	0.00396811	0.0505739
217219	Fam171a2	ENSMUSG00000034685	2.93193	2.26635	0.67429	0.00397396	0.0506034
21778	Tex9	ENSMUSG00000090626	3.5834	3.04358	0.545039	0.00398527	0.0506991
12916	Crem	ENSMUSG00000063889	6.79189	5.47997	1.30839	0.00398857	0.0506991
68520	Zfyve21	ENSMUSG00000021286	6.78586	6.43	0.354559	0.00399382	0.0507208
68140	Tigd2	ENSMUSG00000049232	4.47809	4.86468	-0.389592	0.00400235	0.0507841
73634	Chct1	ENSMUSG00000018479	2.49704	1.35687	1.16505	0.0040102	0.0508385
13660	Ehd1	ENSMUSG00000024772	6.20854	5.91566	0.290585	0.00401404	0.0508421
233765	Plekha7	ENSMUSG00000045659	5.49624	5.0131	0.474869	0.00402271	0.0509069
20741	Sptb	ENSMUSG00000021061	5.91123	5.23955	0.672176	0.00404101	0.0510372
71816	Rnf180	ENSMUSG00000021720	0.585294	1.32443	-0.7153	0.00404126	0.0510372
109225	Ms4a7	ENSMUSG00000024672	2.43388	3.45757	-1.02319	0.00404372	0.0510372
319894	E330017L17Rik	ENSMUSG00000086369	1.1753	3.56857	-2.28785	0.00404731	0.0510375
66714	4921524J17Rik	ENSMUSG00000036934	4.72003	5.25116	-0.516418	0.00405713	0.0511162
66645	Pspc1	ENSMUSG00000021938	4.4302	4.10289	0.315625	0.00407316	0.0512232
170731	Mfn2	ENSMUSG00000029020	7.61363	7.87071	-0.255157	0.00407511	0.0512232
97961	Nol12	ENSMUSG00000033099	5.14902	4.89998	0.246881	0.00408498	0.0512232
21355	Tap2	ENSMUSG00000024339	5.66765	6.09451	-0.432553	0.00408588	0.0512232
13040	Ctss	ENSMUSG00000038642	6.23229	6.83228	-0.600746	0.00409011	0.0512232
100034361	Mfap1b	ENSMUSG00000048222	3.84098	4.25089	-0.402294	0.00409711	0.0512232
71723	Dhx34	ENSMUSG00000006019	3.82481	4.19025	-0.378525	0.00410482	0.0512232
16332	Inppl1	ENSMUSG00000032737	6.65679	6.4191	0.237617	0.00410505	0.0512232
22420	Wnt6	ENSMUSG00000033227	2.60068	1.97828	0.649212	0.004109	0.0512232
22612	Yes1	ENSMUSG00000014932	5.74449	6.06513	-0.319495	0.00411143	0.0512232
252870	Usp7	ENSMUSG00000022710	7.06925	6.83233	0.237065	0.00411179	0.0512232
69700	Col22a1	ENSMUSG00000079022	3.11983	2.51558	0.594736	0.0041131	0.0512232
11428	Aco1	ENSMUSG00000028405	7.44229	7.75385	-0.314211	0.00412	0.0512232
12709	Ckb	ENSMUSG00000001270	5.91283	5.16253	0.751196	0.00412252	0.0512232
11465	Actg1	ENSMUSG00000062825	6.9322	6.66168	0.271802	0.00412262	0.0512232
16533	Kcnmb1	ENSMUSG00000020155	-0.701269	0.233776	-0.918199	0.00412293	0.0512232
54486	Hpgds	ENSMUSG00000029919	1.1728	2.19823	-0.999394	0.00413707	0.0513542
237253	Lrp11	ENSMUSG00000019796	4.99386	5.23332	-0.245353	0.00415172	0.0514423
54199	Ccrl2	ENSMUSG00000043953	3.56111	3.18601	0.375905	0.00415457	0.0514423
17755	Map1b	ENSMUSG00000052727	7.08983	6.36782	0.72632	0.00415672	0.0514423
11997	Akr1b7	ENSMUSG00000052131	12.1277	11.2708	0.866171	0.00415855	0.0514423
70676	Gulp1	ENSMUSG00000056870	5.39166	5.96596	-0.564041	0.00416638	0.051461
21892	Tll1	ENSMUSG00000053626	0.88752	1.61149	-0.746725	0.00416726	0.051461
67760	Slc38a2	ENSMUSG00000022462	8.08237	7.70846	0.375049	0.00417157	0.0514698
56070	Tcerg1	ENSMUSG00000024498	5.92711	5.62619	0.301779	0.00417614	0.0514817
213068	Tmem71	ENSMUSG00000036944	4.70662	5.36838	-0.651281	0.00418434	0.0515058
14632	Gli1	ENSMUSG00000025407	2.88635	2.20121	0.692748	0.0041853	0.0515058
68626	Elac2	ENSMUSG00000020549	6.06499	5.68613	0.375148	0.00420587	0.0517025
12168	Bmpr2	ENSMUSG00000067336	4.82942	5.15611	-0.325208	0.0042117	0.0517025
13590	Lefty1	ENSMUSG00000038793	3.27824	1.32397	1.94343	0.00421488	0.0517025
75416	Nop14	ENSMUSG00000036693	5.37315	5.0892	0.281833	0.00421903	0.0517025
68939	Rasl11b	ENSMUSG00000049907	5.06472	4.56189	0.49657	0.00421936	0.0517025
329679	Fnip2	ENSMUSG00000061175	2.60358	3.01234	-0.406494	0.00422307	0.0517037
51875	Tmem141	ENSMUSG00000026939	4.4745	4.97479	-0.483036	0.00423958	0.0518614
66510	Rnf181	ENSMUSG00000055850	8.64546	8.98532	-0.343342	0.00426728	0.0521556
218341	Rfesd	ENSMUSG00000043190	4.44352	4.73372	-0.281912	0.0042943	0.0524322
12394	Runx1	ENSMUSG00000022952	1.95941	1.22308	0.754099	0.00429724	0.0524322
18854	Pml	ENSMUSG00000036986	5.0658	5.32064	-0.255176	0.00430627	0.0524976
66454	Nmnat1	ENSMUSG00000028992	4.21361	3.8796	0.318279	0.00431162	0.052518
20530	Slc31a2	ENSMUSG00000066152	5.73137	6.03808	-0.304868	0.00431644	0.052532
268970	Arhgap28	ENSMUSG00000024043	5.5241	5.06744	0.457083	0.00432362	0.0525747
56349	Net1	ENSMUSG00000021215	6.36485	5.9718	0.391775	0.0043331	0.0526451
14373	G0s2	ENSMUSG00000009633	4.54075	3.8142	0.721816	0.00436055	0.0529336
15115	Hars	ENSMUSG00000001380	6.69586	6.49621	0.199825	0.00436721	0.0529695
545812	Pilrb2	ENSMUSG00000066682	-0.735608	0.0958201	-0.844682	0.00437356	0.0530016
26360	Angptl2	ENSMUSG00000004105	5.10906	5.58947	-0.481795	0.00438074	0.0530437
382913	Neil2	ENSMUSG00000035121	2.36895	2.91118	-0.537584	0.00438945	0.0531042
236266	Alms1	ENSMUSG00000063810	3.53247	3.96157	-0.426225	0.00439375	0.0531113
69195	Tmem121	ENSMUSG00000049036	2.16629	1.4397	0.751612	0.00440693	0.0532256
16197	Il7r	ENSMUSG00000003882	-0.363961	0.926376	-1.30587	0.00441336	0.0532329
70415	Stk26	ENSMUSG00000031112	2.41014	2.93341	-0.517442	0.00441498	0.0532329
100861634	Gm21092	ENSMUSG00000095403	2.97266	2.48658	0.47733	0.00442168	0.0532688
26378	Decr2	ENSMUSG00000036775	4.67451	4.9313	-0.262089	0.00443773	0.0534171
14357	Dtx1	ENSMUSG00000029603	3.65611	4.08185	-0.435336	0.00444958	0.0535148
258879	Or2t48	ENSMUSG00000050818	-1.40112	1.51938	-2.8114	0.00445865	0.0535788
226539	Dars2	ENSMUSG00000026709	5.29007	5.55136	-0.260968	0.00446702	0.0536342
54616	Extl3	ENSMUSG00000021978	6.6044	6.38911	0.215497	0.00447645	0.053684
233532	Rsf1	ENSMUSG00000035623	5.93619	5.7198	0.217653	0.00447867	0.053684
12934	Dpysl2	ENSMUSG00000022048	4.69735	4.24508	0.440182	0.00448252	0.0536851
27404	Abca8b	ENSMUSG00000020620	4.46073	4.78411	-0.320865	0.00449772	0.0538221
19651	Rbl2	ENSMUSG00000031666	6.38267	6.58961	-0.207147	0.00450617	0.0538781
241327	Olfml2a	ENSMUSG00000046618	4.38257	3.86492	0.499521	0.00453757	0.0541793
54646	Ppp1r3f	ENSMUSG00000039556	2.86522	2.29944	0.551805	0.00453933	0.0541793
22217	Usp12	ENSMUSG00000029640	5.56026	5.30555	0.251694	0.00454692	0.0541793
72033	Tsc22d2	ENSMUSG00000027806	5.24818	4.94819	0.298595	0.00454979	0.0541793
16796	Lasp1	ENSMUSG00000038366	7.1561	7.46227	-0.308617	0.00455544	0.0541793
16001	Igf1r	ENSMUSG00000005533	5.77787	5.36102	0.417657	0.00455733	0.0541793
19126	Prom1	ENSMUSG00000029086	1.42803	0.886847	0.547768	0.00455788	0.0541793
69724	Rnaseh2a	ENSMUSG00000052926	5.76121	6.10262	-0.339442	0.00457088	0.054204
320078	Olfml2b	ENSMUSG00000038463	3.76423	4.4718	-0.712114	0.00457427	0.054204
20305	Ccl6	ENSMUSG00000018927	2.84391	3.54802	-0.721158	0.00457621	0.054204
226517	Smg7	ENSMUSG00000042772	6.52803	6.22342	0.304308	0.00457629	0.054204
76306	Slc18b1	ENSMUSG00000037455	4.45311	4.82701	-0.36429	0.00457891	0.054204
319317	Snhg11	ENSMUSG00000044349	5.18375	5.77243	-0.595625	0.00458272	0.0542043
11539	Adora1	ENSMUSG00000042429	8.00306	8.36293	-0.356377	0.00458931	0.0542374
12282	Hyou1	ENSMUSG00000032115	8.10289	7.70812	0.397991	0.00461297	0.0544719
613262	BC029722	ENSMUSG00000074649	8.18414	8.52253	-0.334755	0.00462692	0.0545551
115489452	A430018G15Rik	ENSMUSG00000085315	2.17421	2.60429	-0.438504	0.00462764	0.0545551
227715	Exosc2	ENSMUSG00000039356	4.81082	4.52805	0.279228	0.00463651	0.0546145
71704	Arhgef3	ENSMUSG00000021895	6.15538	6.4115	-0.256311	0.00464832	0.0547086
67160	Eef1g	ENSMUSG00000071644	7.65133	7.30609	0.350402	0.00466225	0.0548274
217684	Susd6	ENSMUSG00000021133	6.81193	6.57448	0.237633	0.00467332	0.0549124
77200	5430403G16Rik	ENSMUSG00000072763	2.15266	2.73835	-0.576195	0.00468382	0.0549907
21933	Tnfrsf10b	ENSMUSG00000022074	3.20183	2.69828	0.502274	0.00473034	0.0554842
27428	Shroom3	ENSMUSG00000029381	3.14293	2.27706	0.867782	0.00473362	0.0554842
94090	Trim9	ENSMUSG00000021071	-0.05525	0.779906	-0.847144	0.00474009	0.0555146
20846	Stat1	ENSMUSG00000026104	7.64855	8.132	-0.478753	0.00474651	0.0555442
225362	Reep2	ENSMUSG00000038555	3.97441	3.54088	0.419959	0.0047531	0.0555581
217716	Mlh3	ENSMUSG00000021245	4.64339	4.88888	-0.244385	0.00475546	0.0555581
23859	Dlg2	ENSMUSG00000052572	7.18061	7.60859	-0.426034	0.00476336	0.055605
18247	Oaz2	ENSMUSG00000040652	6.15893	5.89772	0.261768	0.00477444	0.0556644
51897	Atg13	ENSMUSG00000027244	6.8556	7.19923	-0.342297	0.00477624	0.0556644
108909	Aida	ENSMUSG00000042901	5.55907	5.32113	0.24056	0.00479703	0.0558612
231148	Ablim2	ENSMUSG00000029095	3.87158	4.33301	-0.458611	0.00480287	0.0558837
21813	Tgfbr2	ENSMUSG00000032440	6.74036	6.95595	-0.215972	0.00481954	0.0560321
242570	Raver2	ENSMUSG00000035275	3.49462	3.08349	0.410468	0.00483055	0.0561144
225207	Zfp521	ENSMUSG00000024420	4.41255	4.74438	-0.331303	0.00484263	0.0561715
11668	Aldh1a1	ENSMUSG00000053279	6.99168	7.90169	-0.906516	0.00485316	0.0561715
16854	Lgals3	ENSMUSG00000050335	3.92814	4.98777	-1.07595	0.00485319	0.0561715
76051	Ganc	ENSMUSG00000062646	5.57202	5.94266	-0.372931	0.00485402	0.0561715
30841	Kdm2b	ENSMUSG00000029475	3.3788	3.72521	-0.342411	0.0048551	0.0561715
18005	Nek2	ENSMUSG00000026622	2.19696	2.94925	-0.723502	0.00489123	0.0565437
12363	Casp4	ENSMUSG00000033538	1.47345	2.09628	-0.60626	0.00489804	0.0565447
18817	Plk1	ENSMUSG00000030867	1.39146	0.437075	0.930841	0.00490073	0.0565447
269799	Clec4a1	ENSMUSG00000049037	0.153516	1.12511	-0.989816	0.00490784	0.0565447
19885	Rorc	ENSMUSG00000028150	4.64555	5.11823	-0.474112	0.00491021	0.0565447
23887	Ggt5	ENSMUSG00000006344	4.57053	3.99887	0.563606	0.00491108	0.0565447
17873	Gadd45b	ENSMUSG00000015312	6.15207	4.71312	1.3976	0.00492234	0.0565628
68241	Mcrip2	ENSMUSG00000025732	6.75623	7.13904	-0.38527	0.00492447	0.0565628
16565	Kif21b	ENSMUSG00000041642	3.47599	3.03538	0.430263	0.00492453	0.0565628
231134	Dok7	ENSMUSG00000044716	2.24427	2.83775	-0.592408	0.00493446	0.0565751
19341	Rab4a	ENSMUSG00000019478	4.27146	3.93219	0.334722	0.00493568	0.0565751
18167	Npy2r	ENSMUSG00000028004	4.91636	4.47815	0.437471	0.00494093	0.0565751
19017	Ppargc1a	ENSMUSG00000029167	1.52057	0.855545	0.651798	0.00494817	0.0565751
64050	Yeats4	ENSMUSG00000020171	5.01922	4.79429	0.226694	0.00495159	0.0565751
66253	Aig1	ENSMUSG00000019806	5.21222	4.89779	0.308056	0.00495288	0.0565751
115487272	Gm24357	ENSMUSG00000064797	-0.111045	-1.30311	1.15036	0.00495329	0.0565751
320472	Ppm1e	ENSMUSG00000046442	6.09509	5.84129	0.2549	0.00496373	0.0566491
19247	Ptpn11	ENSMUSG00000043733	7.86462	7.63917	0.226676	0.00499181	0.0569241
73047	Camk2n2	ENSMUSG00000051146	4.38791	3.23953	1.07882	0.0050015	0.0569817
15410	Hoxb3	ENSMUSG00000048763	4.34154	3.95007	0.411316	0.00500483	0.0569817
74096	Hvcn1	ENSMUSG00000064267	0.839699	1.80158	-0.967443	0.00502801	0.0572001
28081	Fam104a	ENSMUSG00000041629	5.04059	4.80628	0.230216	0.00505	0.0573461
68808	1110046J04Rik	ENSMUSG00000085457	3.14739	3.50767	-0.365252	0.00505291	0.0573461
110454	Ly6a	ENSMUSG00000075602	5.24011	5.80478	-0.564293	0.00505796	0.0573461
75475	Oplah	ENSMUSG00000022562	5.82022	6.14313	-0.326394	0.00505802	0.0573461
50875	Tmod3	ENSMUSG00000058587	6.38691	6.09039	0.298837	0.00506378	0.0573461
22003	Tpm1	ENSMUSG00000032366	7.69084	7.42441	0.267311	0.00506867	0.0573461
330222	Sdk1	ENSMUSG00000039683	3.71944	4.08769	-0.370544	0.00506892	0.0573461
12517	Cd72	ENSMUSG00000028459	1.82608	2.59463	-0.754095	0.00508855	0.057486
17381	Mmp12	ENSMUSG00000049723	2.84509	4.68951	-1.83793	0.00509308	0.057486
434232	Iqck	ENSMUSG00000073856	3.91041	4.39117	-0.463805	0.00509334	0.057486
170743	Tlr7	ENSMUSG00000044583	2.42537	2.99658	-0.55929	0.005103	0.0575496
18430	Oxtr	ENSMUSG00000049112	8.47804	9.12693	-0.656011	0.00511945	0.0576896
54608	Abhd2	ENSMUSG00000039202	10.5028	11.0484	-0.541659	0.00514379	0.0578784
50773	Nt5c	ENSMUSG00000020736	5.92655	6.26071	-0.334316	0.00514429	0.0578784
68612	Ube2c	ENSMUSG00000001403	1.70957	0.791223	0.914855	0.00514905	0.0578864
69909	2610027K06Rik	ENSMUSG00000087013	1.2853	0.51983	0.779502	0.0051766	0.0581503
14910	Gt(ROSA)26Sor	ENSMUSG00000086429	3.05445	1.33235	1.75193	0.00518651	0.0581834
240427	Setbp1	ENSMUSG00000024548	3.56561	3.25519	0.311506	0.00518768	0.0581834
106581	Fam234a	ENSMUSG00000024187	6.77469	7.04831	-0.272559	0.00519973	0.0582728
14066	F3	ENSMUSG00000028128	3.02624	3.69254	-0.680363	0.00521984	0.0584495
236285	Lancl3	ENSMUSG00000047344	1.8515	1.06245	0.801535	0.00522367	0.0584495
246730	Oas1a	ENSMUSG00000052776	2.42129	3.24962	-0.826844	0.00522946	0.0584685
239647	Pced1b	ENSMUSG00000044250	4.0512	3.6502	0.389292	0.00523492	0.0584839
68011	Snrpg	ENSMUSG00000057278	5.54647	5.93669	-0.387309	0.00524402	0.0585297
93762	Smarca5	ENSMUSG00000031715	6.47422	6.22245	0.253048	0.00524721	0.0585297
217304	Cd300lb	ENSMUSG00000063193	-0.0261337	1.27124	-1.29385	0.00526558	0.0586889
17939	Naga	ENSMUSG00000022453	5.67073	5.98679	-0.316468	0.00528693	0.0588433
319764	A730046J19Rik	ENSMUSG00000085139	3.49198	4.00341	-0.516741	0.00528766	0.0588433
100502630	Gm15545	ENSMUSG00000087138	1.12898	1.77565	-0.627086	0.00529406	0.0588686
110651	Rps6ka3	ENSMUSG00000031309	6.70965	6.41977	0.290838	0.00530383	0.0589314
76763	Mospd2	ENSMUSG00000061778	5.22708	5.51373	-0.285209	0.00536579	0.0595736
219132	Phf11d	ENSMUSG00000068245	2.3131	2.89588	-0.573276	0.00537695	0.0595998
231999	Plekha8	ENSMUSG00000005225	4.89473	4.63901	0.261444	0.00537778	0.0595998
14368	Fzd6	ENSMUSG00000022297	4.70268	4.06337	0.638735	0.00538065	0.0595998
74145	F13a1	ENSMUSG00000039109	3.44418	2.96557	0.486386	0.00539175	0.0596765
217305	Cd300ld	ENSMUSG00000034641	1.05589	1.78746	-0.726081	0.00540109	0.0597337
97112	Nmd3	ENSMUSG00000027787	6.05135	5.75929	0.296215	0.00542598	0.05993
57342	Parva	ENSMUSG00000030770	7.31675	7.09887	0.21927	0.00543309	0.05993
59041	Stk25	ENSMUSG00000026277	7.24053	6.98665	0.253024	0.00543531	0.05993
74071	Lmntd1	ENSMUSG00000054966	0.372707	-0.767193	1.17129	0.00543747	0.05993
30937	Lmcd1	ENSMUSG00000057604	2.58846	3.28804	-0.709592	0.0054398	0.05993
170638	Hpcal4	ENSMUSG00000046093	4.05068	3.50326	0.546743	0.00544823	0.0599705
16180	Il1rap	ENSMUSG00000022514	3.92363	4.27571	-0.335923	0.00545186	0.0599705
64075	Smoc1	ENSMUSG00000021136	7.66532	8.13386	-0.46846	0.00546152	0.0600305
16822	Lcp2	ENSMUSG00000002699	1.94349	2.54261	-0.582121	0.00547527	0.0601355
210992	Lpcat1	ENSMUSG00000021608	4.5312	4.80732	-0.270431	0.00548042	0.0601458
66606	Lrrc57	ENSMUSG00000027286	4.60297	4.86889	-0.258731	0.00549274	0.0602348
75974	Dock11	ENSMUSG00000031093	3.72042	3.29904	0.423041	0.00550508	0.0602686
66849	Ppp1r2	ENSMUSG00000047714	6.00918	5.78349	0.226242	0.00551226	0.0602686
11477	Acvr1	ENSMUSG00000026836	5.10839	4.79449	0.305242	0.0055123	0.0602686
277154	Nynrin	ENSMUSG00000075592	4.57509	4.32413	0.255177	0.00551638	0.0602686
72042	Cotl1	ENSMUSG00000031827	5.15778	5.43833	-0.281119	0.00551715	0.0602686
12457	Noct	ENSMUSG00000023087	3.6931	2.96426	0.682089	0.00552111	0.0602686
67647	4930523C07Rik	ENSMUSG00000090394	2.97195	2.43597	0.51329	0.00553258	0.0603082
28114	Nsun2	ENSMUSG00000021595	6.99047	6.76391	0.227518	0.00553317	0.0603082
50493	Txnrd1	ENSMUSG00000020250	7.00853	6.67588	0.336201	0.00557195	0.0606267
330166	Miat	ENSMUSG00000097767	0.161649	-0.98446	1.1567	0.00558035	0.0606267
56409	Nudt3	ENSMUSG00000024213	6.6128	6.36114	0.251904	0.00558228	0.0606267
14184	Fgfr3	ENSMUSG00000054252	1.42646	0.849372	0.58105	0.00558242	0.0606267
12453	Ccni	ENSMUSG00000063015	7.07027	6.79776	0.272018	0.00559173	0.0606267
16848	Lfng	ENSMUSG00000029570	3.36764	3.83756	-0.445785	0.00559184	0.0606267
72507	Dzip1l	ENSMUSG00000037784	3.16137	2.71818	0.455614	0.00559208	0.0606267
74585	Sppl3	ENSMUSG00000029550	5.75944	5.47359	0.291306	0.00559707	0.060635
11656	Alas2	ENSMUSG00000025270	3.18543	2.33333	0.85768	0.0056078	0.0607051
66379	Cox14	ENSMUSG00000023020	6.59974	6.88148	-0.281441	0.0056279	0.0608573
76952	Nt5c2	ENSMUSG00000025041	5.96172	5.74685	0.213812	0.00563524	0.0608573
67711	Nsmce1	ENSMUSG00000030750	5.76176	6.03785	-0.274555	0.00563705	0.0608573
20671	Sox17	ENSMUSG00000025902	2.72402	1.99332	0.764073	0.00563888	0.0608573
114741	Supt16	ENSMUSG00000035726	6.79652	6.5638	0.23298	0.00564473	0.0608745
330577	Saxo2	ENSMUSG00000038570	-0.117636	1.04976	-1.13579	0.00565735	0.0609646
319965	Cc2d1b	ENSMUSG00000028582	5.91072	6.22925	-0.321871	0.00568028	0.0611477
12984	Csf2rb2	ENSMUSG00000071714	-0.58109	0.393443	-0.99205	0.0056858	0.0611477
235472	Prtg	ENSMUSG00000036030	-0.165014	-1.94489	1.72764	0.00569019	0.0611477
19183	Psmc3ip	ENSMUSG00000019303	2.39304	1.94853	0.442363	0.00569449	0.0611477
213603	Slc44a3	ENSMUSG00000039865	5.60999	5.24098	0.368811	0.00569572	0.0611477
99586	Dpyd	ENSMUSG00000033308	5.67961	5.9615	-0.280947	0.00570464	0.0611975
112415	Zfp607b	ENSMUSG00000057093	1.21492	1.76878	-0.563046	0.00576951	0.0618306
74008	Arsg	ENSMUSG00000020604	3.54491	3.98608	-0.428392	0.00577229	0.0618306
17444	Grap2	ENSMUSG00000042351	-0.954203	-0.0982741	-0.857292	0.00579412	0.0619478
14391	Gabpb1	ENSMUSG00000027361	4.40928	4.02751	0.373613	0.00579857	0.0619478
328274	Zfp459	ENSMUSG00000055560	-0.490881	0.644658	-1.14403	0.00579929	0.0619478
73094	Sgip1	ENSMUSG00000028524	2.36528	2.87182	-0.491935	0.00580057	0.0619478
67655	Ctdp1	ENSMUSG00000033323	4.51341	4.22779	0.277536	0.00581928	0.0621012
11764	Ap1b1	ENSMUSG00000009090	6.95835	7.17503	-0.215988	0.00584612	0.0623412
353211	Prune2	ENSMUSG00000039126	5.47989	5.90152	-0.426673	0.00585596	0.0623828
66061	Dynlt2b	ENSMUSG00000014075	3.39909	3.7824	-0.376028	0.00585875	0.0623828
107508	Eprs	ENSMUSG00000026615	8.42155	7.75517	0.672684	0.00587072	0.0624331
24066	Spry4	ENSMUSG00000024427	3.91892	3.41538	0.479791	0.00587221	0.0624331
432779	Lrrc14b	ENSMUSG00000021579	1.27365	0.648775	0.624583	0.0059061	0.0626876
211253	Mtrf1	ENSMUSG00000022022	3.30616	3.73772	-0.41961	0.00591643	0.0626876
66660	Sltm	ENSMUSG00000032212	5.98463	5.69601	0.289505	0.00592143	0.0626876
14371	Fzd9	ENSMUSG00000049551	1.83892	1.21894	0.6177	0.00592203	0.0626876
72056	1810055G02Rik	ENSMUSG00000035372	4.87548	4.3622	0.486747	0.00592304	0.0626876
71846	Syce2	ENSMUSG00000003824	2.2025	1.6976	0.521028	0.00592459	0.0626876
73061	Cldn34c1	ENSMUSG00000079450	-0.913576	-0.0596163	-0.855303	0.00593243	0.0626876
15507	Hspb1	ENSMUSG00000004951	5.24911	4.55003	0.685704	0.00593874	0.0626876
13437	Dnpep	ENSMUSG00000026209	6.22364	6.53015	-0.307274	0.00593955	0.0626876
67899	Cmc1	ENSMUSG00000039163	4.32476	4.6447	-0.3101	0.00593998	0.0626876
232414	Clec9a	ENSMUSG00000046080	-1.34171	-0.514977	-0.838077	0.00595145	0.0627162
50883	Chek2	ENSMUSG00000029521	2.33088	2.88842	-0.540453	0.00595407	0.0627162
78473	Skap1	ENSMUSG00000057058	4.22238	3.74048	0.508906	0.00595584	0.0627162
71336	Rbks	ENSMUSG00000029136	2.51648	3.0523	-0.539806	0.00596864	0.0627868
20410	Sorbs3	ENSMUSG00000022091	6.34295	6.75605	-0.415155	0.00597133	0.0627868
66222	Serpinb1a	ENSMUSG00000044734	6.84972	7.1788	-0.330664	0.00598773	0.0629129
11568	Aebp1	ENSMUSG00000020473	9.2491	9.55905	-0.306459	0.00600307	0.0630278
98878	Ehd4	ENSMUSG00000027293	5.74778	5.96579	-0.215829	0.0060103	0.0630324
20821	Trim21	ENSMUSG00000030966	4.60247	4.92058	-0.307895	0.00601777	0.0630324
118449	Synpo2	ENSMUSG00000050315	4.52285	3.72093	0.831491	0.00601842	0.0630324
20981	Syt3	ENSMUSG00000030731	2.63328	3.15032	-0.519584	0.00602365	0.0630324
69656	Pir	ENSMUSG00000031379	3.08992	2.62564	0.470982	0.00602555	0.0630324
19012	Plpp1	ENSMUSG00000021759	7.91251	7.67989	0.233499	0.00606962	0.063447
20301	Ccl27a	ENSMUSG00000073888	2.82177	2.3004	0.513064	0.00607686	0.0634763
16157	Il11ra1	ENSMUSG00000073889	5.7978	5.56567	0.229774	0.00609259	0.0635942
268932	Caskin1	ENSMUSG00000033597	5.01589	5.75094	-0.729428	0.00610866	0.0637154
212377	Mms22l	ENSMUSG00000045751	2.69683	2.17399	0.522663	0.00614866	0.0640858
104732	Tedc1	ENSMUSG00000037466	1.432	0.582555	0.853821	0.00615636	0.0641194
12288	Cacna1c	ENSMUSG00000051331	6.9408	6.52178	0.420318	0.0061705	0.0642199
19704	Upf1	ENSMUSG00000058301	6.01133	5.69642	0.311597	0.00618492	0.0642856
433424	Zeb2os	ENSMUSG00000052248	2.15846	2.52229	-0.363806	0.00619475	0.0642856
232413	Clec12a	ENSMUSG00000053063	1.67165	2.50067	-0.799096	0.00619873	0.0642856
56195	Ptbp2	ENSMUSG00000028134	4.98174	4.59952	0.389078	0.00619874	0.0642856
170829	Tram2	ENSMUSG00000041779	2.98212	2.53843	0.436663	0.00619929	0.0642856
231861	Tnrc18	ENSMUSG00000039477	4.98713	4.60952	0.367557	0.0062139	0.0643904
230815	Man1c1	ENSMUSG00000037306	5.2314	4.869	0.358913	0.00622737	0.0644438
18190	Nrxn2	ENSMUSG00000033768	3.63628	2.90823	0.721812	0.00622807	0.0644438
278279	Tmtc2	ENSMUSG00000036019	2.95427	2.48454	0.481156	0.00625749	0.0646426
321022	Cdv3	ENSMUSG00000032803	6.7489	6.45104	0.299071	0.00626009	0.0646426
69068	Tcim	ENSMUSG00000056313	5.94664	5.53961	0.411234	0.00626084	0.0646426
26397	Map2k3	ENSMUSG00000018932	6.67738	7.01436	-0.336105	0.00628012	0.0647949
53881	Slc5a3	ENSMUSG00000089774	5.62858	4.97434	0.649343	0.0062848	0.0647964
12649	Chek1	ENSMUSG00000032113	2.14092	1.50595	0.61964	0.00629017	0.0648051
74335	Xrcc3	ENSMUSG00000021287	4.19492	3.83499	0.365433	0.00630744	0.0649337
68917	Hint2	ENSMUSG00000028470	5.19506	4.78714	0.395243	0.00631174	0.0649337
13614	Edn1	ENSMUSG00000021367	-0.246883	-1.09859	0.876465	0.0063232	0.0649585
71240	Osbpl7	ENSMUSG00000038534	3.64668	4.03066	-0.380715	0.00633397	0.0649585
56430	Clip1	ENSMUSG00000049550	7.43525	7.19378	0.242574	0.00633765	0.0649585
100502940	Pou2af3	ENSMUSG00000079559	1.39576	2.0295	-0.618908	0.00633805	0.0649585
72155	Cenpn	ENSMUSG00000031756	2.37974	1.8005	0.58447	0.00633961	0.0649585
20787	Srebf1	ENSMUSG00000020538	7.18499	7.52526	-0.337085	0.00634432	0.0649585
103844	Inca1	ENSMUSG00000057054	2.70322	3.13327	-0.419529	0.0063493	0.0649585
14235	Foxm1	ENSMUSG00000001517	2.13191	1.45251	0.702084	0.00635575	0.0649585
108086	Rnf216	ENSMUSG00000045078	5.89698	6.15328	-0.258177	0.0063587	0.0649585
99151	Cercam	ENSMUSG00000039787	3.87896	3.52537	0.359432	0.00635958	0.0649585
241062	Pgap1	ENSMUSG00000073678	2.71457	3.13644	-0.407453	0.00636815	0.0649996
233115	Dpy19l3	ENSMUSG00000043671	5.48107	5.76073	-0.282379	0.00637693	0.0650428
100039924	Rps13-ps2	ENSMUSG00000069972	-3.31996	-0.727582	-2.53744	0.00640379	0.0652653
667977	Gm8909	ENSMUSG00000073402	0.423946	-2.63317	3.04087	0.00640786	0.0652653
226139	Cox15	ENSMUSG00000040018	6.49275	6.73696	-0.2438	0.00642547	0.065398
216350	Tspan8	ENSMUSG00000034127	0.93264	1.48504	-0.53989	0.00643011	0.0653987
214895	Lman2l	ENSMUSG00000001143	5.873	5.51406	0.350499	0.00644157	0.0654687
319638	Nt5dc1	ENSMUSG00000039480	4.63113	4.90102	-0.260676	0.00646151	0.0656247
84506	Hamp	ENSMUSG00000050440	1.72897	3.87838	-2.21671	0.00648061	0.065772
320782	Tmem154	ENSMUSG00000056498	2.23388	3.04747	-0.785908	0.0064907	0.0658277
15936	Ier2	ENSMUSG00000053560	4.64647	3.9545	0.687777	0.00650509	0.0659269
75404	Arhgap36	ENSMUSG00000036198	-0.890542	0.295093	-1.16008	0.00651161	0.0659461
69675	Pxdn	ENSMUSG00000020674	6.09089	6.46849	-0.378846	0.00651866	0.0659472
230959	Ajap1	ENSMUSG00000039546	3.08758	3.78629	-0.679866	0.00652495	0.0659472
68045	Rtraf	ENSMUSG00000021807	6.30055	6.60442	-0.303395	0.00652564	0.0659472
73728	Psd	ENSMUSG00000037126	2.3808	2.95043	-0.556311	0.00653015	0.0659472
238803	Zfp366	ENSMUSG00000050919	0.974824	1.64338	-0.654835	0.00656947	0.0662856
170762	Nup155	ENSMUSG00000022142	5.54519	5.32683	0.217809	0.00657294	0.0662856
56520	Nme4	ENSMUSG00000024177	1.71761	2.34807	-0.626985	0.00658172	0.0663275
16765	Stmn1	ENSMUSG00000028832	2.66934	2.07552	0.599381	0.00658853	0.0663492
229731	Slc25a24	ENSMUSG00000040322	6.92559	6.64906	0.276572	0.00659443	0.0663619
14813	Grin2c	ENSMUSG00000020734	2.6199	3.5042	-0.858384	0.00660802	0.066452
12905	Cradd	ENSMUSG00000045867	3.40057	3.79878	-0.421637	0.00661588	0.0664843
74777	Selenon	ENSMUSG00000050989	5.58011	5.36674	0.209765	0.00662257	0.0664916
233904	Setd1a	ENSMUSG00000042308	4.25982	3.87571	0.386938	0.00662591	0.0664916
100504104	Gm16062	ENSMUSG00000087249	4.26974	3.67485	0.600172	0.00664055	0.0665766
15289	Hmgb1	ENSMUSG00000066551	5.89785	6.14824	-0.25294	0.00664369	0.0665766
170459	Stard4	ENSMUSG00000024378	6.17584	7.01558	-0.840603	0.00668104	0.0668711
193003	Pirt	ENSMUSG00000048070	3.89052	4.22428	-0.341832	0.00668243	0.0668711
214133	Tet2	ENSMUSG00000040943	5.49193	5.11544	0.380976	0.00669049	0.0669049
56462	Mtch1	ENSMUSG00000024012	7.5673	7.33445	0.233535	0.00669601	0.0669133
668940	Myh7b	ENSMUSG00000074652	-0.154534	-1.75136	1.61596	0.00673642	0.0672701
230726	Rhbdl2	ENSMUSG00000043333	-1.31387	-0.313799	-1.01129	0.0067672	0.0675304
14281	Fos	ENSMUSG00000021250	3.84216	2.02858	1.80498	0.00678943	0.0676715
70083	Metrn	ENSMUSG00000002274	5.14789	4.59826	0.562586	0.00679447	0.0676715
71799	Ptcd1	ENSMUSG00000029624	5.1531	5.51517	-0.358495	0.00679555	0.0676715
57752	Tacc2	ENSMUSG00000030852	4.89358	4.58419	0.319509	0.00683316	0.0678679
80877	Lrba	ENSMUSG00000028080	5.19344	6.02947	-0.846565	0.0068347	0.0678679
12585	Cdr2	ENSMUSG00000030878	3.16013	2.39539	0.727544	0.00683669	0.0678679
81897	Tlr9	ENSMUSG00000045322	-0.395233	0.477215	-0.871683	0.00683775	0.0678679
68731	Rbfa	ENSMUSG00000024570	5.55663	5.87081	-0.315362	0.006839	0.0678679
114714	Rad51c	ENSMUSG00000007646	1.66798	1.11139	0.569206	0.00688418	0.0682488
18769	Pkig	ENSMUSG00000035268	4.75281	5.22572	-0.473295	0.00688693	0.0682488
208518	Cep78	ENSMUSG00000041491	3.91454	3.51747	0.391377	0.00691068	0.0683728
56185	Hao2	ENSMUSG00000027870	8.6912	9.38704	-0.691462	0.00691201	0.0683728
78798	Eml4	ENSMUSG00000032624	5.6662	5.43319	0.232911	0.00691378	0.0683728
72168	Aifm3	ENSMUSG00000022763	4.8205	4.32186	0.501657	0.00692186	0.0684054
217038	Mrm1	ENSMUSG00000018405	4.65087	4.25359	0.386642	0.00692889	0.0684276
70382	Kctd2	ENSMUSG00000016940	6.30068	6.66791	-0.367308	0.00695455	0.0685782
77031	Slc9a8	ENSMUSG00000039463	6.15684	6.37787	-0.221736	0.00695586	0.0685782
14527	Gcgr	ENSMUSG00000025127	-0.762987	0.318185	-1.09096	0.00695991	0.0685782
18082	Nipsnap1	ENSMUSG00000034285	5.78776	5.53076	0.257245	0.00696627	0.0685782
21386	Tbx3	ENSMUSG00000018604	8.26513	8.02354	0.244355	0.00696812	0.0685782
69101	Ydjc	ENSMUSG00000041774	2.90989	3.39007	-0.463495	0.00697735	0.0686218
171167	Fut10	ENSMUSG00000046152	3.80668	3.44635	0.357	0.00701754	0.0689377
12267	C3ar1	ENSMUSG00000040552	3.15168	4.00877	-0.819842	0.00702308	0.0689377
224045	Eif2b5	ENSMUSG00000003235	6.40164	6.18	0.222098	0.00703578	0.0689377
17304	Mfge8	ENSMUSG00000030605	7.72561	8.07305	-0.342693	0.00703729	0.0689377
13036	Ctsh	ENSMUSG00000032359	7.58494	7.85291	-0.269462	0.00703738	0.0689377
100042889	C920021L13Rik	ENSMUSG00000080727	-1.16022	-0.218342	-0.91039	0.0070384	0.0689377
12331	Cap1	ENSMUSG00000028656	7.5579	7.36834	0.190594	0.00705722	0.0690066
271424	Ip6k3	ENSMUSG00000024210	-0.0253134	0.610246	-0.626079	0.00706083	0.0690066
75578	Fggy	ENSMUSG00000028573	5.55364	5.92513	-0.373553	0.0070657	0.0690066
76670	Cfap70	ENSMUSG00000039543	2.92921	2.32157	0.606952	0.00706847	0.0690066
240028	Lnpep	ENSMUSG00000023845	5.8633	6.22452	-0.357642	0.00707319	0.0690066
268470	Ube2z	ENSMUSG00000014349	6.70693	6.50094	0.206785	0.00707439	0.0690066
214704	Iqub	ENSMUSG00000046192	-0.481181	-1.1669	0.690591	0.00709648	0.069175
381903	Alg8	ENSMUSG00000035704	4.38019	4.07555	0.296577	0.00712434	0.069323
77717	Smim41	ENSMUSG00000075408	-0.42454	-1.63982	1.16083	0.00712484	0.069323
21808	Tgfb2	ENSMUSG00000039239	1.9879	1.34787	0.64864	0.00712991	0.069323
16859	Lgals9	ENSMUSG00000001123	4.64521	5.12982	-0.482874	0.00713915	0.069323
65254	Dpysl5	ENSMUSG00000029168	1.41206	0.6538	0.771214	0.00714053	0.069323
69136	Tusc1	ENSMUSG00000054000	3.1894	2.75123	0.450206	0.00714076	0.069323
224840	Treml4	ENSMUSG00000051682	-1.70524	0.326235	-2.02593	0.00714991	0.0693648
192191	Med9	ENSMUSG00000061650	5.21407	5.50882	-0.293308	0.00715545	0.0693715
56378	Arpc3	ENSMUSG00000029465	7.37697	7.15474	0.224579	0.00716674	0.0694338
320119	Rps6kc1	ENSMUSG00000089872	4.68504	4.42549	0.253219	0.0071816	0.069494
100087	Kti12	ENSMUSG00000073775	4.78592	4.54826	0.234047	0.00718267	0.069494
68957	Paqr6	ENSMUSG00000041423	1.85792	1.26264	0.611267	0.00719978	0.0696125
353310	Zfp703	ENSMUSG00000085795	6.20288	5.61385	0.579452	0.00720604	0.069626
208213	Tmem132c	ENSMUSG00000034324	0.905616	0.0934331	0.810462	0.00721152	0.0696318
19153	Prx	ENSMUSG00000053198	2.83482	2.3507	0.50339	0.0072184	0.0696512
237615	Ankrd52	ENSMUSG00000014498	6.53508	6.2591	0.275604	0.00723457	0.0697379
22213	Ube2g2	ENSMUSG00000009293	5.74965	5.53317	0.217131	0.00723714	0.0697379
109754	Cyb5r3	ENSMUSG00000018042	8.57509	8.83778	-0.260667	0.00724712	0.0697518
20544	Slc9a1	ENSMUSG00000028854	5.94022	6.20344	-0.263775	0.00724833	0.0697518
16399	Itga2b	ENSMUSG00000034664	1.71678	1.11794	0.599686	0.00727363	0.0699481
109901	Cela1	ENSMUSG00000023031	5.31442	5.89422	-0.573442	0.00730331	0.0701584
110351	Rap1gap	ENSMUSG00000041351	6.969	7.293	-0.323503	0.00730785	0.0701584
319953	Ttll1	ENSMUSG00000022442	3.29512	3.60015	-0.310628	0.00731021	0.0701584
108888	Atad3a	ENSMUSG00000029036	6.26457	6.00208	0.261891	0.00732637	0.0702389
56485	Slc2a5	ENSMUSG00000028976	-0.42334	-1.37148	0.963812	0.00733946	0.0702389
208292	Zfp871	ENSMUSG00000024298	4.42417	4.84473	-0.40787	0.00734035	0.0702389
544696	Tbc1d32	ENSMUSG00000038122	4.45173	4.7131	-0.253733	0.00734702	0.0702389
27406	Abcf3	ENSMUSG00000003234	6.52753	6.30529	0.22235	0.00735025	0.0702389
71373	Prr16	ENSMUSG00000073565	5.07219	5.43666	-0.357761	0.00735502	0.0702389
16913	Psmb8	ENSMUSG00000024338	4.7632	5.26831	-0.517433	0.00736087	0.0702389
67801	Pllp	ENSMUSG00000031775	-0.3616	-1.186	0.812496	0.00736133	0.0702389
100382	AW011738	ENSMUSG00000078349	0.651721	1.246	-0.591577	0.00736281	0.0702389
104080	Nxph4	ENSMUSG00000040258	3.32548	3.84662	-0.507221	0.0073812	0.0703675
63913	Niban1	ENSMUSG00000026483	7.90494	7.49487	0.411501	0.00740371	0.070535
74144	Robo4	ENSMUSG00000032125	4.73831	4.97171	-0.238318	0.00742074	0.0706502
404634	Macroh2a2	ENSMUSG00000020086	4.43544	4.00427	0.433199	0.00743448	0.0707339
270110	Irf2bp2	ENSMUSG00000051495	5.98737	5.67484	0.309599	0.00744274	0.0707654
246198	Mllt6	ENSMUSG00000038437	6.49723	6.25869	0.238048	0.0074525	0.0707706
19340	Rab3d	ENSMUSG00000019066	6.5173	6.80595	-0.289838	0.00745318	0.0707706
217864	Rcor1	ENSMUSG00000037896	6.37791	6.07799	0.30099	0.00746661	0.0708511
11515	Adcy9	ENSMUSG00000005580	5.83565	6.16171	-0.32927	0.00751649	0.0712427
434784	Ldoc1	ENSMUSG00000057615	-0.24316	0.58177	-0.820357	0.00751785	0.0712427
114886	Cygb	ENSMUSG00000020810	6.15178	5.67905	0.471171	0.00755658	0.0715623
67861	Akr1b10	ENSMUSG00000061758	7.55775	7.31618	0.243129	0.00756418	0.0715868
16019	Ighm	ENSMUSG00000076617	5.84519	6.34625	-0.50457	0.00757881	0.0716779
67101	2310039H08Rik	ENSMUSG00000062619	4.61284	4.8973	-0.290034	0.00758977	0.0717283
216233	Socs2	ENSMUSG00000020027	4.22879	5.02164	-0.848198	0.00759417	0.0717283
268390	Ahsa2	ENSMUSG00000020288	6.10607	5.70718	0.397957	0.00761181	0.0718474
67041	Oxct1	ENSMUSG00000022186	7.76523	7.97655	-0.2102	0.00763828	0.071973
20148	Dhrs3	ENSMUSG00000066026	6.15046	6.58596	-0.436742	0.00764312	0.071973
76901	Jade2	ENSMUSG00000020387	5.56165	5.31648	0.23974	0.00764503	0.071973
12043	Bcl2	ENSMUSG00000057329	3.30327	2.93604	0.365592	0.00764524	0.071973
16600	Klf4	ENSMUSG00000003032	3.61607	2.37405	1.18174	0.00766243	0.0720442
226866	Sbspon	ENSMUSG00000032719	2.87212	3.49362	-0.634384	0.00766288	0.0720442
236573	Gbp9	ENSMUSG00000029298	3.34559	4.07255	-0.725545	0.00767909	0.0721491
68701	Ppp1r27	ENSMUSG00000025129	-0.594792	0.347291	-0.925512	0.00769705	0.0722318
242474	Tmem245	ENSMUSG00000055296	6.67635	7.03625	-0.360291	0.00769799	0.0722318
16792	Laptm5	ENSMUSG00000028581	4.5019	4.91171	-0.40783	0.00770962	0.0722935
225358	Fam13b	ENSMUSG00000036501	6.05667	5.81267	0.244145	0.00773679	0.0725008
70381	Tecpr1	ENSMUSG00000066621	7.08087	6.69689	0.385587	0.00777009	0.0727651
72462	Rrp1b	ENSMUSG00000058392	4.59076	4.24393	0.339474	0.00777874	0.0727984
217258	Abca8a	ENSMUSG00000041828	5.51125	6.01627	-0.50301	0.00778651	0.0728235
80861	Dhx58	ENSMUSG00000017830	6.31962	6.62599	-0.306616	0.00781552	0.073047
109674	Ampd2	ENSMUSG00000027889	7.94798	7.4859	0.46168	0.00783824	0.0731695
11717	Ampd3	ENSMUSG00000005686	5.05305	5.33936	-0.28883	0.00783886	0.0731695
107747	Aldh1l1	ENSMUSG00000030088	7.79884	8.28488	-0.484011	0.00787741	0.073448
17880	Myh11	ENSMUSG00000018830	2.89415	3.39456	-0.517632	0.00787896	0.073448
78506	Micu3	ENSMUSG00000039478	4.1168	3.79542	0.310219	0.00788928	0.0734962
319190	H2bc21	ENSMUSG00000068854	4.04621	4.46854	-0.411538	0.00790608	0.0735616
207921	Fam228b	ENSMUSG00000050545	-0.467859	0.433776	-0.8723	0.00790658	0.0735616
632302	Cyp21a2-ps	ENSMUSG00000092471	8.66874	7.85621	0.809023	0.00791795	0.0736194
380711	Rap1gap2	ENSMUSG00000038807	4.21142	4.55024	-0.347534	0.00792341	0.0736223
52626	Cdkn2aipnl	ENSMUSG00000020392	4.98929	4.63906	0.353282	0.00794152	0.0737427
385674	Zfp174	ENSMUSG00000054939	4.86626	5.49435	-0.597951	0.00795435	0.0738139
108911	Rcc2	ENSMUSG00000040945	6.41255	6.15153	0.259703	0.00796534	0.0738601
72807	Zfp429	ENSMUSG00000078994	1.65234	-0.93602	2.53579	0.00797333	0.0738601
319616	Fzd10os	ENSMUSG00000072591	1.23982	0.0289787	1.1516	0.00797483	0.0738601
109731	Maob	ENSMUSG00000040147	5.22701	4.9073	0.313035	0.00799111	0.073963
218543	Srek1	ENSMUSG00000032621	5.9545	5.6709	0.282122	0.0080076	0.0740038
15369	Hmox2	ENSMUSG00000004070	6.84816	6.54894	0.297678	0.00800879	0.0740038
22781	Ikzf4	ENSMUSG00000002578	2.05355	2.91969	-0.912458	0.00801353	0.0740038
214932	Hdhd5	ENSMUSG00000058979	4.86319	5.11441	-0.252265	0.00801621	0.0740038
243373	AI854703	ENSMUSG00000053297	2.54902	2.00509	0.569613	0.00803113	0.0740937
13418	Dnajc1	ENSMUSG00000026740	6.36399	6.1026	0.26142	0.00804598	0.0741572
72836	Pot1b	ENSMUSG00000024174	3.00827	3.50925	-0.502365	0.00804839	0.0741572
240869	Zbtb37	ENSMUSG00000043467	2.06098	2.59267	-0.505056	0.00806133	0.0742286
66526	Tceanc2	ENSMUSG00000028619	4.59026	4.89552	-0.29634	0.00808918	0.074416
54338	Slc23a2	ENSMUSG00000027340	8.06868	7.48394	0.592856	0.00809776	0.074416
170707	Usp48	ENSMUSG00000043411	6.89877	6.67953	0.2192	0.00809886	0.074416
66548	Adamtsl5	ENSMUSG00000043822	3.59404	3.15585	0.45033	0.0081025	0.074416
67345	Herc4	ENSMUSG00000020064	7.68235	7.35676	0.32373	0.0081511	0.0748107
13434	Trdmt1	ENSMUSG00000026723	2.6281	3.07256	-0.44224	0.00815594	0.0748107
225288	Fhod3	ENSMUSG00000034295	4.12323	3.70141	0.404033	0.00816507	0.0748465
30877	Gnl3	ENSMUSG00000042354	6.2349	5.87897	0.356301	0.00817245	0.0748542
12544	Cdc45	ENSMUSG00000000028	3.22183	2.82791	0.401701	0.00817638	0.0748542
66052	Sdhc	ENSMUSG00000058076	7.09369	6.87522	0.219496	0.00818632	0.0748973
214547	She	ENSMUSG00000046280	3.29055	3.6558	-0.346873	0.00819608	0.0749032
269952	Gdpgp1	ENSMUSG00000050973	2.45137	2.88916	-0.433433	0.00819744	0.0749032
18550	Furin	ENSMUSG00000030530	7.40053	7.12382	0.276839	0.00820272	0.0749035
108912	Cdca2	ENSMUSG00000048922	1.82296	1.10195	0.73154	0.00821014	0.0749234
77300	Raph1	ENSMUSG00000026014	4.56539	3.6663	0.867325	0.00821622	0.0749311
16598	Klf2	ENSMUSG00000055148	4.08966	3.74446	0.330432	0.00822823	0.0749928
17263	Meg3	ENSMUSG00000021268	9.33743	8.73435	0.603685	0.00824068	0.0750584
236511	Ago1	ENSMUSG00000041530	6.29203	6.49109	-0.199191	0.0082473	0.0750709
53412	Ppp1r3c	ENSMUSG00000067279	2.14316	1.58803	0.560688	0.00826991	0.0751924
210146	Irgq	ENSMUSG00000041037	5.32662	5.55235	-0.223637	0.00827187	0.0751924
98053	Gtf2f1	ENSMUSG00000002658	6.0994	5.87063	0.22687	0.0082775	0.0751924
235044	Plppr2	ENSMUSG00000040563	4.61895	4.99318	-0.383847	0.00829178	0.0751924
73906	4833417C18Rik	ENSMUSG00000086015	-0.413432	0.260417	-0.667874	0.00829461	0.0751924
76633	Lrmda	ENSMUSG00000063458	1.38949	1.86673	-0.496399	0.00829633	0.0751924
78514	Arhgap10	ENSMUSG00000037148	5.08867	5.65843	-0.588237	0.00830118	0.0751924
245050	Gask1a	ENSMUSG00000038233	1.5104	0.991719	0.52372	0.00830421	0.0751924
100169	Phactr4	ENSMUSG00000066043	5.71598	5.39835	0.319367	0.00830797	0.0751924
74392	Specc1l	ENSMUSG00000033444	7.0786	6.87235	0.20715	0.00831651	0.075222
232371	C1rl	ENSMUSG00000038527	4.89975	5.23773	-0.351484	0.00833904	0.0753782
70110	Ifi35	ENSMUSG00000010358	5.75224	5.9862	-0.234465	0.00836101	0.0755291
22384	Eif4h	ENSMUSG00000040731	8.36612	8.10058	0.264969	0.00837011	0.0755635
71544	Arhgap42	ENSMUSG00000050730	4.85226	4.45689	0.380533	0.00841749	0.0759433
69089	Oxa1l	ENSMUSG00000000959	6.55937	6.81375	-0.255407	0.00843645	0.0760612
14679	Gnai3	ENSMUSG00000000001	8.38098	8.05855	0.319845	0.00845389	0.0760612
19085	Prkar1b	ENSMUSG00000025855	6.54329	6.21766	0.325739	0.00845588	0.0760612
381260	Gm973	ENSMUSG00000047361	3.4048	4.43538	-0.978998	0.00845627	0.0760612
68487	Tmem140	ENSMUSG00000057137	3.84036	4.20908	-0.366678	0.00845715	0.0760612
93843	Pnck	ENSMUSG00000002012	3.77054	3.43982	0.317164	0.00846468	0.076081
59069	Tpm3	ENSMUSG00000027940	6.90121	7.40804	-0.503634	0.00851544	0.0764892
56506	Cib2	ENSMUSG00000037493	3.89495	3.4603	0.417633	0.00852607	0.0765366
14377	G6pc	ENSMUSG00000078650	1.23212	-0.0046193	1.23207	0.00857624	0.0769259
68428	Steap3	ENSMUSG00000026389	4.65276	5.10841	-0.456375	0.0085802	0.0769259
67676	Rpp21	ENSMUSG00000024446	4.29582	3.91404	0.38047	0.00859478	0.0769844
381605	Tbc1d2	ENSMUSG00000039813	1.81739	2.31918	-0.526907	0.00860585	0.0769844
434484	Sp140	ENSMUSG00000070031	1.57534	2.1479	-0.563749	0.00860767	0.0769844
22123	Psmd3	ENSMUSG00000017221	6.91423	6.67193	0.24242	0.00860825	0.0769844
70152	Mettl7a1	ENSMUSG00000054619	6.04344	6.48102	-0.438237	0.00861866	0.0770293
19069	Nup88	ENSMUSG00000040667	6.35489	6.16365	0.191568	0.00862744	0.0770596
67419	Armh4	ENSMUSG00000036242	2.32928	1.86709	0.461035	0.00866632	0.0773585
237988	Cdr2l	ENSMUSG00000050910	6.46749	5.99141	0.475101	0.00867837	0.0773648
78830	Slc25a12	ENSMUSG00000027010	7.0379	6.7502	0.287895	0.00868118	0.0773648
233806	Tmem159	ENSMUSG00000030917	6.49423	6.8701	-0.375366	0.00868325	0.0773648
18751	Prkcb	ENSMUSG00000052889	2.89008	3.30047	-0.408688	0.00869355	0.0774084
18797	Plcb3	ENSMUSG00000024960	6.02516	5.72883	0.2933	0.00871685	0.0775674
77744	Bora	ENSMUSG00000022070	1.87512	1.39616	0.480127	0.00872511	0.0775927
55991	Panx1	ENSMUSG00000031934	2.95465	3.3664	-0.419394	0.00873475	0.0776302
52551	Sgta	ENSMUSG00000004937	7.48883	7.18263	0.310407	0.00875027	0.0777198
71904	Paqr7	ENSMUSG00000037348	5.26124	5.84204	-0.563793	0.00875728	0.0777338
66329	Susd3	ENSMUSG00000021384	1.65744	0.993552	0.682799	0.00876858	0.0777858
66401	Nudt2	ENSMUSG00000028443	4.27661	4.5795	-0.296711	0.0087913	0.077903
70086	Cysltr2	ENSMUSG00000033470	-0.83975	0.0497724	-0.895275	0.00879269	0.077903
15212	Hexb	ENSMUSG00000021665	6.08936	6.42112	-0.331276	0.00882725	0.0781608
223267	Ggact	ENSMUSG00000041625	4.78705	5.11464	-0.326402	0.00885951	0.0783476
68947	Chst8	ENSMUSG00000060402	3.77634	3.31931	0.442267	0.00886057	0.0783476
67996	Srsf6	ENSMUSG00000016921	8.09586	7.83688	0.257441	0.00886719	0.0783476
15211	Hexa	ENSMUSG00000025232	7.246	7.44058	-0.194327	0.00887026	0.0783476
234258	Neil3	ENSMUSG00000039396	0.738176	-0.388034	1.14773	0.00888232	0.0784056
387609	Zhx2	ENSMUSG00000071757	4.77575	4.4635	0.308905	0.00890133	0.078525
381110	Rmdn2	ENSMUSG00000036368	7.84104	8.21357	-0.378369	0.00892922	0.0787137
56335	Mettl3	ENSMUSG00000022160	5.34286	5.08876	0.255774	0.00893372	0.0787137
69071	Tmem97	ENSMUSG00000037278	4.66995	4.96098	-0.292427	0.00894553	0.0787597
19347	Dennd5a	ENSMUSG00000035901	8.45992	8.24898	0.211011	0.00894997	0.0787597
170834	Oosp1	ENSMUSG00000041857	-0.675756	0.174927	-0.857114	0.00900225	0.0791508
71330	Rcbtb1	ENSMUSG00000035469	5.88323	6.12472	-0.240095	0.00900547	0.0791508
219149	Xkr6	ENSMUSG00000035067	4.01953	3.64236	0.383053	0.00903931	0.0793676
72587	Pan3	ENSMUSG00000029647	5.72859	5.47921	0.256055	0.00904125	0.0793676
12774	Ccr5	ENSMUSG00000079227	2.43795	3.1576	-0.689312	0.00907561	0.0796204
22591	Xpc	ENSMUSG00000030094	5.0959	5.31442	-0.217775	0.00909219	0.079717
67680	Sdhb	ENSMUSG00000009863	7.971	8.23778	-0.267534	0.00917065	0.0803555
215632	Psd4	ENSMUSG00000026979	1.18423	1.94366	-0.741395	0.00920722	0.0806266
23805	Apc2	ENSMUSG00000020135	2.02817	2.61478	-0.570658	0.00923995	0.0808322
245404	Dcaf12l1	ENSMUSG00000045284	2.85155	3.2683	-0.403716	0.00924201	0.0808322
12661	Chl1	ENSMUSG00000030077	4.56558	5.89153	-1.3419	0.00925152	0.080866
77037	Mrap	ENSMUSG00000039956	8.24219	7.68183	0.568428	0.00929268	0.0811761
110842	Etfa	ENSMUSG00000032314	7.80086	8.02916	-0.229914	0.00931423	0.0813147
66368	Rtca	ENSMUSG00000000339	5.18955	4.95655	0.234261	0.0093264	0.0813605
69581	Rhou	ENSMUSG00000039960	5.60424	5.32539	0.276986	0.00933085	0.0813605
115487215	Gm7628	ENSMUSG00000025644	1.08349	1.77407	-0.686884	0.00933862	0.0813786
17686	Msh3	ENSMUSG00000014850	5.00116	5.28404	-0.28313	0.00935187	0.0814422
20867	Stip1	ENSMUSG00000024966	7.73994	7.36718	0.376483	0.00935731	0.0814422
57781	Cd200r1	ENSMUSG00000022667	-1.50389	-0.422681	-1.08825	0.00939108	0.0816388
26914	Macroh2a1	ENSMUSG00000015937	6.82845	6.61422	0.215531	0.00939131	0.0816388
553127	Rtl8b	ENSMUSG00000067924	4.35321	3.9662	0.374053	0.00941084	0.0816662
208967	Thnsl1	ENSMUSG00000048550	4.2586	4.53621	-0.276741	0.00941148	0.0816662
23945	Mgll	ENSMUSG00000033174	7.82003	7.42398	0.394511	0.00941922	0.0816662
240518	Peli3	ENSMUSG00000024901	3.29923	3.69076	-0.376781	0.00942035	0.0816662
19822	Rnf4	ENSMUSG00000029110	7.13867	6.92395	0.215632	0.00942303	0.0816662
381306	BC055324	ENSMUSG00000041406	1.97711	1.32132	0.67256	0.00943316	0.0816831
20442	St3gal1	ENSMUSG00000013846	6.58348	5.90096	0.681537	0.00943639	0.0816831
53601	Pcdh12	ENSMUSG00000024440	4.12454	4.40269	-0.271985	0.00946095	0.0818021
104718	Ttc7b	ENSMUSG00000033530	6.28513	6.57565	-0.291498	0.00946159	0.0818021
66570	Cenpm	ENSMUSG00000068101	1.4431	0.468715	0.959027	0.00947832	0.0818973
12727	Clcn4	ENSMUSG00000000605	7.06119	7.24602	-0.18542	0.00949258	0.081971
66643	Lix1	ENSMUSG00000047786	2.05658	2.60247	-0.555477	0.00949913	0.081978
117198	Ivns1abp	ENSMUSG00000023150	7.41003	7.72516	-0.317265	0.00952712	0.0821699
56496	Tspan6	ENSMUSG00000067377	6.13014	5.5066	0.630936	0.00956746	0.0823887
14199	Fhl1	ENSMUSG00000023092	5.87224	5.61508	0.25931	0.00956886	0.0823887
319673	9330159M07Rik	ENSMUSG00000097177	0.462886	1.1003	-0.639446	0.0095701	0.0823887
16145	Igtp	ENSMUSG00000078853	4.42494	4.85032	-0.440076	0.00957649	0.0823887
270669	Mbtps2	ENSMUSG00000046873	4.96262	5.21601	-0.251245	0.00958128	0.0823887
67039	Rbm25	ENSMUSG00000010608	7.06062	6.76568	0.293949	0.00959168	0.0824185
64406	Sp5	ENSMUSG00000075304	1.24388	0.416609	0.838402	0.00960105	0.0824185
171486	Cd99l2	ENSMUSG00000035776	7.86832	7.67124	0.197931	0.00960204	0.0824185
54720	Rcan1	ENSMUSG00000022951	4.46676	4.18296	0.282227	0.00961488	0.0824234
56454	Aldh18a1	ENSMUSG00000025007	5.66473	6.00221	-0.337526	0.00961711	0.0824234
227059	Slc39a10	ENSMUSG00000025986	5.52052	5.82494	-0.300383	0.00961991	0.0824234
12793	Cnih1	ENSMUSG00000015759	6.82401	7.10293	-0.277899	0.00963379	0.0824929
320165	Tacc1	ENSMUSG00000065954	8.21085	8.50971	-0.297436	0.00965213	0.0826005
77035	Kdm8	ENSMUSG00000030752	2.40145	2.84787	-0.45882	0.00969639	0.082911
57080	Gtf2ird1	ENSMUSG00000023079	4.95113	4.6408	0.304013	0.00970001	0.082911
233651	Dchs1	ENSMUSG00000036862	3.26163	3.64711	-0.381305	0.00971821	0.0829989
14768	Lancl1	ENSMUSG00000026000	5.56434	5.81876	-0.256345	0.0097219	0.0829989
12831	Col5a1	ENSMUSG00000026837	5.42756	6.01361	-0.593658	0.00974121	0.0831086
272636	Esyt3	ENSMUSG00000037681	-0.195017	-1.22155	1.0145	0.0097541	0.0831086
84095	Pi4k2a	ENSMUSG00000025178	6.68029	6.44439	0.236206	0.00975753	0.0831086
218215	Rnf144b	ENSMUSG00000038068	2.12421	2.58252	-0.449325	0.009758	0.0831086
245671	Klf8	ENSMUSG00000041649	-0.785439	0.0170408	-0.791238	0.00976778	0.0831424
55932	Gbp3	ENSMUSG00000028268	4.16237	4.83579	-0.677923	0.00977515	0.0831557
20192	Ryr3	ENSMUSG00000057378	2.14678	2.70373	-0.562426	0.00979134	0.0831993
212032	Hk3	ENSMUSG00000025877	0.912399	1.73634	-0.858406	0.00979192	0.0831993
69178	Snx5	ENSMUSG00000027423	7.10536	7.42446	-0.31921	0.00982252	0.0833912
240057	Syngap1	ENSMUSG00000067629	3.59186	3.17338	0.404675	0.00982616	0.0833912
14050	Eya3	ENSMUSG00000028886	5.7453	5.53291	0.209274	0.00983484	0.0834153
12894	Cpt1a	ENSMUSG00000024900	9.0695	8.65301	0.417883	0.00987313	0.0836708
75826	Senp2	ENSMUSG00000022855	5.82791	5.55167	0.273723	0.00987711	0.0836708
11370	Acadvl	ENSMUSG00000018574	7.73384	7.53302	0.201084	0.00988502	0.0836708
19414	Rasa3	ENSMUSG00000031453	5.36153	6.0989	-0.752731	0.00988837	0.0836708
56744	Pf4	ENSMUSG00000029373	0.934402	1.53357	-0.603679	0.00989882	0.0837097
236643	Sytl5	ENSMUSG00000054453	1.50552	2.1987	-0.686904	0.00992088	0.0838467
226075	Glis3	ENSMUSG00000052942	2.83372	2.43241	0.39723	0.00993141	0.0838822
68440	Dusp23	ENSMUSG00000026544	1.78872	1.08637	0.708013	0.00993681	0.0838822
70599	Itprid2	ENSMUSG00000027007	5.86548	6.06183	-0.196688	0.00996455	0.0840667
234911	Mmp27	ENSMUSG00000070323	-0.425523	0.665907	-1.10633	0.00998256	0.084169
228852	Ppp1r16b	ENSMUSG00000037754	3.96141	4.48366	-0.548109	0.0100695	0.0848205
26364	Adgre5	ENSMUSG00000002885	5.42236	5.79663	-0.381057	0.0100717	0.0848205
210126	Lpp	ENSMUSG00000033306	7.05324	7.30845	-0.254398	0.0100783	0.0848261
18114	Rrp1	ENSMUSG00000061032	7.72036	7.49215	0.229381	0.0100973	0.0849364
74108	Parn	ENSMUSG00000022685	5.94741	6.15532	-0.209133	0.010111	0.0850012
102182	Prmt9	ENSMUSG00000037134	4.9536	5.21807	-0.265403	0.0101269	0.0850571
15403	Hoxa6	ENSMUSG00000043219	1.3632	0.555329	0.792164	0.0101295	0.0850571
234515	Inpp4b	ENSMUSG00000037940	1.86071	2.44695	-0.570802	0.0101851	0.0854734
225876	Kdm2a	ENSMUSG00000054611	7.20151	6.92443	0.275115	0.0101935	0.0854935
74427	Eaf1	ENSMUSG00000021890	6.46081	6.19648	0.264269	0.0102027	0.0855066
387524	Znrf2	ENSMUSG00000058446	6.64289	6.93462	-0.291101	0.010207	0.0855066
245596	Hdx	ENSMUSG00000034551	2.23655	1.67104	0.566829	0.0102139	0.0855148
56199	Abcb10	ENSMUSG00000031974	4.70105	5.03008	-0.315977	0.0102512	0.0857283
108705	Pttg1ip	ENSMUSG00000009291	7.77234	7.99441	-0.224275	0.0102543	0.0857283
70769	Nolc1	ENSMUSG00000015176	6.58945	6.31256	0.277991	0.0102574	0.0857283
13350	Dgat1	ENSMUSG00000022555	5.26098	4.6887	0.555005	0.0102863	0.08589
56533	Rgs17	ENSMUSG00000019775	0.911292	1.61692	-0.694371	0.0102906	0.08589
227656	Rexo4	ENSMUSG00000052406	5.37569	5.15103	0.222363	0.0102948	0.08589
19015	Ppard	ENSMUSG00000002250	5.29334	4.91677	0.368073	0.0103121	0.0859667
12704	Cit	ENSMUSG00000029516	2.96926	3.81263	-0.930391	0.010316	0.0859667
170786	Cd209a	ENSMUSG00000031494	-1.50155	0.399397	-1.85798	0.0103399	0.0860924
21844	Tiam1	ENSMUSG00000002489	6.07827	5.79815	0.278096	0.0103431	0.0860924
13982	Esr1	ENSMUSG00000019768	4.65648	5.40869	-0.744894	0.0103781	0.086333
16497	Kcnab1	ENSMUSG00000027827	1.51358	2.48092	-0.927746	0.010389	0.0863734
22701	Zfp41	ENSMUSG00000047003	3.4252	3.91742	-0.462716	0.0103958	0.0863802
330814	Adgrl1	ENSMUSG00000013033	6.87267	7.23334	-0.360567	0.0104155	0.0864936
21815	Tgif1	ENSMUSG00000047407	5.58889	5.1715	0.430234	0.0104272	0.0865404
22668	Sf1	ENSMUSG00000024949	7.17228	6.88115	0.29355	0.0104361	0.086564
14969	H2-Eb1	ENSMUSG00000060586	6.26403	7.02886	-0.763916	0.0104678	0.0867769
102635948	Gm16201	ENSMUSG00000086742	3.79543	3.40014	0.405166	0.0104946	0.0869435
12804	Cntfr	ENSMUSG00000028444	5.17476	4.78808	0.38192	0.0105001	0.0869435
68498	Tspan11	ENSMUSG00000030351	4.08871	3.09788	0.940513	0.0105411	0.0872156
209645	Bend7	ENSMUSG00000048186	5.05229	4.68053	0.366249	0.0105452	0.0872156
57816	Tesc	ENSMUSG00000029359	7.06597	6.82626	0.241909	0.0105707	0.0872998
72355	Cdpf1	ENSMUSG00000064284	3.62075	3.98758	-0.38436	0.0105724	0.0872998
52635	Esyt2	ENSMUSG00000021171	7.0186	6.7772	0.242444	0.0105737	0.0872998
641376	Tomm40l	ENSMUSG00000005674	5.4524	5.26031	0.19192	0.0105806	0.0873069
380959	Alg10b	ENSMUSG00000075470	5.56618	5.84712	-0.27731	0.0106035	0.0874454
71699	Slc41a3	ENSMUSG00000030089	5.66749	5.16183	0.498149	0.010613	0.0874729
230718	Nt5c1a	ENSMUSG00000054958	3.89676	4.27593	-0.385761	0.01062	0.0874808
100041286	Snhg15	ENSMUSG00000085156	2.98286	2.19053	0.764265	0.0106431	0.0875639
320981	Enpp6	ENSMUSG00000038173	0.104933	0.866885	-0.735339	0.0106648	0.0875639
17385	Mmp11	ENSMUSG00000000901	3.24818	2.8764	0.380675	0.0106721	0.0875639
18553	Pcsk6	ENSMUSG00000030513	2.10002	2.93964	-0.862557	0.010674	0.0875639
407788	BC051142	ENSMUSG00000057246	1.13512	0.220288	0.884376	0.0106842	0.0875639
72017	Cyb5r1	ENSMUSG00000026456	5.60704	5.42801	0.180421	0.0106912	0.0875639
269514	Fbxl4	ENSMUSG00000040410	5.22749	5.45008	-0.217585	0.0106947	0.0875639
68554	Cebpzos	ENSMUSG00000062691	4.23881	4.60449	-0.364886	0.010701	0.0875639
223473	Nipal2	ENSMUSG00000038879	4.44734	4.10212	0.333561	0.0107051	0.0875639
14586	Gfra2	ENSMUSG00000022103	4.01029	3.53621	0.465688	0.0107053	0.0875639
72296	Rusc1	ENSMUSG00000041263	4.68453	5.03527	-0.363456	0.0107084	0.0875639
12371	Casp9	ENSMUSG00000028914	5.18067	5.44287	-0.255992	0.0107111	0.0875639
70123	Nbdy	ENSMUSG00000086316	5.35503	5.55021	-0.194629	0.0107128	0.0875639
110385	Pde4c	ENSMUSG00000031842	0.0715954	-0.957707	1.05167	0.0107159	0.0875639
320148	B430306N03Rik	ENSMUSG00000043740	-1.47167	-0.0509846	-1.44206	0.0107321	0.0876469
16477	Junb	ENSMUSG00000052837	6.2243	4.83897	1.36529	0.0107424	0.0876809
20556	Slfn2	ENSMUSG00000072620	3.33976	3.83768	-0.492015	0.0107635	0.0878024
74102	Slc35a5	ENSMUSG00000022664	5.08707	5.42762	-0.333871	0.0107773	0.0878654
12566	Cdk2	ENSMUSG00000025358	4.53015	4.27086	0.265681	0.0108219	0.0881785
16826	Ldb2	ENSMUSG00000039706	3.94768	4.36278	-0.405633	0.0108333	0.0882207
208431	Shroom4	ENSMUSG00000068270	4.5069	4.15439	0.355791	0.0108538	0.0882409
319974	Auts2	ENSMUSG00000029673	4.34126	3.91728	0.411037	0.0108553	0.0882409
83560	Tex14	ENSMUSG00000010342	0.309181	-0.93873	1.28045	0.0108574	0.0882409
78070	Cpt1c	ENSMUSG00000007783	4.08098	3.711	0.382667	0.0108617	0.0882409
15902	Id2	ENSMUSG00000020644	8.56923	8.9729	-0.409796	0.0108666	0.0882409
108679	Cops8	ENSMUSG00000034432	6.41599	6.24158	0.174422	0.0108832	0.0882746
244895	Peak1	ENSMUSG00000074305	6.77539	6.54822	0.22741	0.0108917	0.0882746
74203	Eif4enif1	ENSMUSG00000020454	5.80063	5.55431	0.245297	0.0108919	0.0882746
29807	Tpk1	ENSMUSG00000029735	5.06433	5.28592	-0.219118	0.0108958	0.0882746
100434	Slc44a1	ENSMUSG00000028412	6.13271	6.35912	-0.225808	0.0109016	0.0882746
71998	Slc25a35	ENSMUSG00000018740	4.19557	4.57246	-0.388146	0.010921	0.0883819
328561	Apol10b	ENSMUSG00000050014	-1.74246	-0.726458	-0.988427	0.0109279	0.0883874
238377	Gpr68	ENSMUSG00000047415	0.62299	1.41253	-0.786558	0.01095	0.0884884
76894	Mettl15	ENSMUSG00000057234	2.74955	3.15684	-0.399602	0.0109528	0.0884884
270627	Taf1	ENSMUSG00000031314	6.41188	6.21413	0.197683	0.0109784	0.0886453
74035	Nol9	ENSMUSG00000028948	5.31008	5.09747	0.210459	0.0109976	0.0886847
66566	Ntpcr	ENSMUSG00000031851	4.23108	4.51413	-0.283707	0.011004	0.0886847
195359	Trim40	ENSMUSG00000073399	0.420096	1.72926	-1.29608	0.0110072	0.0886847
226422	Rab29	ENSMUSG00000026433	3.97479	4.27307	-0.303127	0.0110081	0.0886847
14885	Gtf2h4	ENSMUSG00000001524	3.40912	3.70667	-0.299055	0.0110205	0.0887347
19165	Psen2	ENSMUSG00000010609	5.06313	5.28025	-0.223537	0.0110335	0.0887892
66531	Cmc2	ENSMUSG00000014633	5.14877	5.36506	-0.215841	0.0110519	0.0887993
230828	Il22ra1	ENSMUSG00000037157	-1.44161	0.278855	-1.64977	0.0110525	0.0887993
18637	Pfdn2	ENSMUSG00000006412	5.93742	5.68624	0.248473	0.0110569	0.0887993
16510	Kcnh1	ENSMUSG00000058248	-1.12523	0.401878	-1.47175	0.0110595	0.0887993
56193	Plek	ENSMUSG00000020120	3.74381	4.18645	-0.424116	0.0110816	0.0888966
67602	Necap1	ENSMUSG00000030327	6.12969	5.95931	0.170685	0.0110895	0.0888966
13205	Ddx3x	ENSMUSG00000000787	9.57599	9.3145	0.261627	0.0110903	0.0888966
15953	Ifi47	ENSMUSG00000078920	2.34137	2.90632	-0.57005	0.0111213	0.0890698
106947	Slc39a3	ENSMUSG00000046822	6.93874	7.24884	-0.310227	0.0111249	0.0890698
15201	Hells	ENSMUSG00000025001	3.22206	2.73781	0.498315	0.0111306	0.0890698
71096	Sntg1	ENSMUSG00000025909	-0.0379255	0.979762	-0.994806	0.0111444	0.0891303
13175	Dclk1	ENSMUSG00000027797	0.754147	0.0726438	0.685024	0.0111515	0.0891368
15064	Mr1	ENSMUSG00000026471	6.38328	6.58848	-0.205582	0.0111577	0.0891368
230979	Tnfrsf14	ENSMUSG00000042333	0.814375	1.28314	-0.478628	0.0111691	0.0891783
17858	Mx2	ENSMUSG00000023341	1.54744	2.36234	-0.795243	0.0111933	0.0893218
270118	Maml2	ENSMUSG00000031925	3.38528	3.66031	-0.280822	0.0112013	0.0893357
96957	Tmem62	ENSMUSG00000054484	5.08016	5.29309	-0.21111	0.0112097	0.0893525
56543	Kcnd3	ENSMUSG00000040896	3.32243	2.97948	0.344878	0.0112421	0.0895609
109050	Inka2	ENSMUSG00000048458	2.78963	1.9918	0.831026	0.0112522	0.0895917
216001	Micu1	ENSMUSG00000020111	6.68502	6.40739	0.278974	0.0112625	0.0896115
449000	Zfp960	ENSMUSG00000096696	0.763927	1.41708	-0.637708	0.0112672	0.0896115
228071	Sestd1	ENSMUSG00000042272	5.33807	5.06197	0.275364	0.0112777	0.0896449
12408	Cbr1	ENSMUSG00000051483	7.73473	7.21274	0.518436	0.0112893	0.0896676
26920	Cntrl	ENSMUSG00000057110	5.22316	5.67509	-0.442428	0.0112931	0.0896676
210274	Shank2	ENSMUSG00000037541	3.34249	3.7236	-0.373705	0.0113325	0.0899308
68708	Rabl2	ENSMUSG00000022621	3.38012	3.00595	0.361676	0.0113396	0.0899368
22059	Trp53	ENSMUSG00000059552	5.9713	5.76501	0.205955	0.0113662	0.0900982
19155	Npepps	ENSMUSG00000001441	6.68619	6.4747	0.211288	0.0113825	0.0901775
243372	Zfp775	ENSMUSG00000007216	3.32618	3.7759	-0.441293	0.0114032	0.0902909
11302	Aatk	ENSMUSG00000025375	4.13857	4.52407	-0.392762	0.0114162	0.0903439
408066	Cspg4b	ENSMUSG00000021763	0.534217	-0.26634	0.806236	0.0114256	0.0903687
195434	Utp14b	ENSMUSG00000079470	0.577752	1.29189	-0.716467	0.0114379	0.090401
97387	Strn4	ENSMUSG00000030374	6.32569	6.14043	0.184382	0.0114459	0.090401
50786	Hs6st2	ENSMUSG00000062184	4.55048	5.02625	-0.473649	0.011451	0.090401
432467	Hnrnph3	ENSMUSG00000020069	5.40425	5.16876	0.2302	0.011455	0.090401
76376	Slc24a2	ENSMUSG00000037996	4.86317	5.34049	-0.477227	0.011466	0.0904381
233912	Armc5	ENSMUSG00000042178	4.91046	4.64548	0.260803	0.0114892	0.0905708
668253	Dleu2	ENSMUSG00000097589	2.9878	2.65779	0.340255	0.0115085	0.0906353
101809	Spred3	ENSMUSG00000037239	3.6103	3.08991	0.514735	0.01151	0.0906353
225187	Ankrd29	ENSMUSG00000057766	3.4788	2.76815	0.742195	0.0115308	0.0907485
94249	Slc24a3	ENSMUSG00000063873	3.57679	3.20357	0.380499	0.0115413	0.0907598
71398	Tasl	ENSMUSG00000025058	0.22068	1.01484	-0.776625	0.0115449	0.0907598
14664	Slc6a9	ENSMUSG00000028542	4.07491	3.78805	0.288242	0.0115682	0.0908927
15331	Hmgn2	ENSMUSG00000003038	5.68722	6.13143	-0.443511	0.0115789	0.0908979
75785	Klhl24	ENSMUSG00000062901	6.16103	6.55805	-0.397336	0.0115815	0.0908979
18131	Notch3	ENSMUSG00000038146	3.10528	3.70228	-0.621699	0.0116107	0.0910421
23797	Akt3	ENSMUSG00000019699	5.7114	5.47645	0.236266	0.0116137	0.0910421
20409	Ostf1	ENSMUSG00000024725	6.57935	6.34733	0.232169	0.0116246	0.0910421
22240	Dpysl3	ENSMUSG00000024501	4.69763	5.00335	-0.303402	0.0116254	0.0910421
20170	Hps6	ENSMUSG00000074811	3.76403	4.11261	-0.329722	0.0117275	0.0917912
29818	Hspb7	ENSMUSG00000006221	1.70395	0.864988	0.852236	0.0117827	0.0921398
319263	Pcmtd1	ENSMUSG00000051285	6.31916	6.56265	-0.243773	0.0117849	0.0921398
70345	0610038B21Rik	ENSMUSG00000097882	-0.176737	-1.64295	1.46141	0.0117997	0.0922051
78933	Agbl4	ENSMUSG00000061298	-0.586308	0.101609	-0.687384	0.0118119	0.0922502
28169	Agpat3	ENSMUSG00000001211	8.03765	8.3158	-0.278626	0.0118397	0.0923688
71881	Apmap	ENSMUSG00000033096	6.90834	6.72648	0.182525	0.01184	0.0923688
26384	Gnpda1	ENSMUSG00000052102	5.25208	5.01773	0.231804	0.0118587	0.0924639
209497	Tmem164	ENSMUSG00000047045	5.98685	6.22064	-0.235832	0.0118685	0.0924731
19192	Psme3	ENSMUSG00000078652	6.91976	6.72346	0.197272	0.0118728	0.0924731
12484	Cd24a	ENSMUSG00000047139	5.64998	5.09428	0.559834	0.0118982	0.0926207
67247	Mtarc2	ENSMUSG00000073481	6.91058	6.65859	0.252818	0.0119245	0.0927581
268859	Rbfox1	ENSMUSG00000008658	0.706673	0.0708253	0.614482	0.0119288	0.0927581
226251	Ablim1	ENSMUSG00000025085	4.41886	4.92744	-0.496891	0.0119416	0.092807
269610	Chd5	ENSMUSG00000005045	4.1021	4.58172	-0.490198	0.0119639	0.0928934
52614	Adgre4	ENSMUSG00000032915	-0.0767221	0.743147	-0.821416	0.0119657	0.0928934
14963	H2-Bl	ENSMUSG00000073406	-0.336337	-2.03664	1.75697	0.0119847	0.0929745
18230	Nxn	ENSMUSG00000020844	5.64535	5.26139	0.387627	0.0119892	0.0929745
66943	Slc66a2	ENSMUSG00000034006	4.51066	4.82848	-0.323071	0.011996	0.092977
234094	Arhgef10	ENSMUSG00000071176	4.27615	3.96028	0.306688	0.0120551	0.0933842
69303	1700001G11Rik	ENSMUSG00000085984	-1.02134	-0.30702	-0.702759	0.0120886	0.0935342
17221	Cd46	ENSMUSG00000016493	0.73203	1.35206	-0.621055	0.0120913	0.0935342
18383	Tnfrsf11b	ENSMUSG00000063727	4.19149	3.68075	0.504263	0.012094	0.0935342
229279	Hnrnpa3	ENSMUSG00000059005	7.58127	7.32812	0.255015	0.0121103	0.0936092
50767	Pnpla6	ENSMUSG00000004565	5.89142	5.54807	0.337385	0.0121436	0.0937461
71819	Kif23	ENSMUSG00000032254	2.03364	1.38132	0.674013	0.0121459	0.0937461
238333	Samd15	ENSMUSG00000090812	0.140157	0.733994	-0.587737	0.0121477	0.0937461
27386	Npas3	ENSMUSG00000021010	0.0107299	-0.875115	0.910722	0.0121763	0.0939167
76014	Zc3h18	ENSMUSG00000017478	5.67518	5.42609	0.243954	0.012189	0.0939439
70099	Smc4	ENSMUSG00000034349	6.22082	5.97169	0.250208	0.012193	0.0939439
104103	Airn	ENSMUSG00000078247	1.39826	1.91052	-0.513355	0.0121996	0.0939445
58916	Myot	ENSMUSG00000024471	1.90011	1.12993	0.785272	0.0122171	0.0940282
69168	Bola1	ENSMUSG00000015943	3.89258	4.24237	-0.351009	0.0122274	0.0940569
226151	Slf2	ENSMUSG00000036097	5.31788	5.52773	-0.21106	0.0122441	0.0940582
20887	Sult1a1	ENSMUSG00000030711	5.02963	4.71442	0.306538	0.0122493	0.0940582
241520	Fam171b	ENSMUSG00000048388	3.54695	3.89688	-0.338925	0.0122547	0.0940582
12388	Ctnnd1	ENSMUSG00000034101	7.96779	7.78581	0.181308	0.0122642	0.0940582
69668	Ccdc115	ENSMUSG00000042111	4.30904	4.63406	-0.313624	0.0122652	0.0940582
59014	Rrs1	ENSMUSG00000061024	4.7939	5.0591	-0.27577	0.0122692	0.0940582
66306	Fam53c	ENSMUSG00000034300	5.64281	5.44744	0.192995	0.0122736	0.0940582
210719	Mkx	ENSMUSG00000061013	3.10177	3.88528	-0.753632	0.0122911	0.0941418
23832	Xcr1	ENSMUSG00000060509	-0.905174	0.526572	-1.38633	0.0123017	0.0941723
59010	Sqor	ENSMUSG00000005803	5.98828	6.22823	-0.238427	0.0123214	0.0942726
269523	Vcp	ENSMUSG00000028452	8.3953	8.07661	0.324875	0.0123494	0.0944368
58203	Zbp1	ENSMUSG00000027514	1.99347	3.08258	-1.0943	0.0123818	0.0945848
70737	Cgn	ENSMUSG00000068876	0.807013	0.189901	0.649319	0.0123914	0.0945848
70162	Hk1os	ENSMUSG00000085347	-0.415687	0.189384	-0.592809	0.0123943	0.0945848
81702	Ankrd17	ENSMUSG00000055204	7.61177	7.41848	0.191695	0.0123952	0.0945848
224829	Trerf1	ENSMUSG00000064043	4.79954	4.51732	0.271134	0.0124309	0.0948065
11501	Adam8	ENSMUSG00000025473	1.55009	2.36573	-0.85828	0.0124517	0.0948629
112590811	Ndufa12-ps	ENSMUSG00000080893	3.46811	0.303582	3.1742	0.012453	0.0948629
78177	Ninl	ENSMUSG00000068115	5.61973	5.93748	-0.32026	0.0124604	0.0948629
72315	Ccdc74a	ENSMUSG00000041617	0.0539374	-0.791254	0.833385	0.0124648	0.0948629
66674	Spryd7	ENSMUSG00000021930	4.71973	5.07767	-0.347014	0.0124832	0.0949155
15107	Hadh	ENSMUSG00000027984	8.49591	8.75762	-0.261555	0.012485	0.0949155
436022	Dnaaf3	ENSMUSG00000055809	1.09714	0.118749	0.983727	0.0125163	0.0950722
11771	Ap2a1	ENSMUSG00000060279	6.40389	6.15575	0.247394	0.0125189	0.0950722
243743	Plxna4	ENSMUSG00000029765	3.44998	3.87173	-0.427826	0.0125743	0.0953965
114615	Elac1	ENSMUSG00000036941	4.40806	4.71292	-0.305352	0.0125869	0.0953965
229801	Tram1l1	ENSMUSG00000044528	1.85418	2.25911	-0.412332	0.0125897	0.0953965
17002	Ltf	ENSMUSG00000032496	-0.95336	-0.11792	-0.873849	0.0125898	0.0953965
226432	Ipo9	ENSMUSG00000041879	6.72795	6.49989	0.228103	0.0125967	0.0953965
11304	Abca4	ENSMUSG00000028125	1.99869	3.72896	-1.80705	0.0126017	0.0953965
22355	Vipr2	ENSMUSG00000011171	-0.272098	-1.44826	1.17055	0.0126169	0.0954423
234797	6430548M08Rik	ENSMUSG00000031824	7.80489	7.46361	0.341352	0.0126211	0.0954423
68118	Atg101	ENSMUSG00000037204	5.41148	4.85261	0.539328	0.0126565	0.0956467
106504	Stk38	ENSMUSG00000024006	5.96454	5.77422	0.188076	0.0126694	0.0956467
76074	Gbp8	ENSMUSG00000034438	-0.320803	0.619309	-0.937834	0.012686	0.0956467
231004	Samd11	ENSMUSG00000096351	1.24008	2.20299	-0.957707	0.0126867	0.0956467
215772	Adgb	ENSMUSG00000050994	-1.13254	0.15122	-1.28787	0.0126883	0.0956467
383787	Ankrd63	ENSMUSG00000078137	-1.31885	0.245633	-1.577	0.0127104	0.0956467
73690	Glipr1	ENSMUSG00000056888	1.37634	2.16971	-0.781491	0.0127146	0.0956467
102414	Clk3	ENSMUSG00000032316	5.93381	5.70183	0.229106	0.0127178	0.0956467
19664	Rbpj	ENSMUSG00000039191	5.20541	4.91057	0.292136	0.0127188	0.0956467
14085	Fah	ENSMUSG00000030630	6.54056	5.47073	1.05776	0.0127306	0.0956467
69470	Tmem127	ENSMUSG00000034850	7.26021	7.08113	0.179544	0.0127338	0.0956467
217031	Tada2a	ENSMUSG00000018651	4.33253	4.10034	0.228279	0.0127361	0.0956467
272347	Zfp398	ENSMUSG00000062519	3.37879	3.74894	-0.365051	0.0127376	0.0956467
244421	Lonrf1	ENSMUSG00000039633	3.53511	3.92055	-0.385137	0.0127417	0.0956467
211896	Depdc7	ENSMUSG00000027173	1.28678	0.797648	0.495305	0.0127654	0.0957742
214240	Disp2	ENSMUSG00000040035	6.46921	6.81614	-0.346806	0.0127752	0.0957973
110446	Acat1	ENSMUSG00000032047	7.59107	7.82669	-0.23516	0.0128183	0.0960545
338363	Tmem241	ENSMUSG00000049411	3.35007	3.65647	-0.305426	0.0128229	0.0960545
68161	A930005H10Rik	ENSMUSG00000054426	1.92169	3.17281	-1.31017	0.0128869	0.096483
20449	St8sia1	ENSMUSG00000030283	1.33628	1.8476	-0.508718	0.0129271	0.0967332
228662	Btbd3	ENSMUSG00000062098	5.34995	5.07707	0.269817	0.0129528	0.0968752
212326	Fam149a	ENSMUSG00000070044	3.97505	4.26794	-0.303496	0.0129898	0.0971009
70530	Lrfn2	ENSMUSG00000040490	-0.639606	-1.78758	1.19762	0.0130066	0.0971417
244653	Hydin	ENSMUSG00000059854	0.629989	1.46102	-0.870696	0.0130088	0.0971417
105000	Dnal1	ENSMUSG00000042523	4.97778	4.70459	0.275507	0.0130271	0.0971926
14370	Fzd8	ENSMUSG00000036904	4.39233	4.90989	-0.49401	0.0130343	0.0971926
232087	Mat2a	ENSMUSG00000053907	8.12184	7.75945	0.368325	0.013036	0.0971926
12505	Cd44	ENSMUSG00000005087	6.76856	6.08853	0.683056	0.0130522	0.0972488
67628	Anp32b	ENSMUSG00000028333	6.35528	6.1425	0.211869	0.0130572	0.0972488
64294	Itm2c	ENSMUSG00000026223	10.3447	10.0417	0.301439	0.0130801	0.0973228
100038433	9130213A22Rik	ENSMUSG00000097386	-0.91805	-0.16288	-0.748864	0.0130895	0.0973228
67338	Rffl	ENSMUSG00000020696	3.24576	3.57939	-0.339572	0.0130914	0.0973228
56620	Clec4n	ENSMUSG00000023349	0.758212	1.68213	-0.924499	0.0130943	0.0973228
240753	Plekha6	ENSMUSG00000041757	5.11956	4.73677	0.376193	0.0131052	0.0973369
76380	Cep112	ENSMUSG00000020728	2.80352	2.29517	0.495228	0.0131106	0.0973369
19662	Rbp4	ENSMUSG00000024990	3.62535	2.37197	1.2326	0.0131177	0.0973369
268656	Sptlc1	ENSMUSG00000021468	6.90108	7.09602	-0.196031	0.0131235	0.0973369
20928	Abcc9	ENSMUSG00000030249	4.71836	5.03224	-0.315798	0.0131504	0.0974374
208982	Hmgcll1	ENSMUSG00000007908	2.34931	2.72649	-0.377815	0.0131506	0.0974374
74256	Cyld	ENSMUSG00000036712	6.6944	6.88514	-0.190645	0.0131773	0.0974833
12297	Cacnb3	ENSMUSG00000003352	4.21891	3.84794	0.379775	0.0131814	0.0974833
219140	Spata13	ENSMUSG00000021990	6.60454	6.92888	-0.322096	0.0131854	0.0974833
70601	Ecd	ENSMUSG00000021810	6.09983	5.89284	0.205951	0.0131888	0.0974833
19305	Pex5	ENSMUSG00000005069	6.62647	6.31345	0.312574	0.0131909	0.0974833
240660	Slc35g1	ENSMUSG00000044026	4.96828	5.46271	-0.478374	0.0132041	0.0974838
77411	Esrp2	ENSMUSG00000084128	1.66815	2.36073	-0.71788	0.0132046	0.0974838
74134	Cyp2s1	ENSMUSG00000040703	-0.0601552	0.907442	-0.986556	0.013222	0.0975616
110532	Adarb1	ENSMUSG00000020262	5.41718	5.07934	0.338836	0.0132433	0.09766
100416730	Gm15382	ENSMUSG00000083083	-1.34565	-0.163638	-1.16576	0.0132603	0.09766
68728	Trp53inp2	ENSMUSG00000038375	8.73942	8.40111	0.345214	0.0132624	0.09766
28295	Gatd3a	ENSMUSG00000053329	7.38979	7.62151	-0.230323	0.0132626	0.09766
595136	Ndufs5	ENSMUSG00000028648	2.06824	3.95296	-1.90016	0.0133168	0.0980086
234549	Heatr3	ENSMUSG00000031657	6.09117	5.91158	0.179119	0.0133775	0.0983925
280411	Lix1l	ENSMUSG00000049288	5.6412	5.92939	-0.282296	0.0133884	0.0983925
72650	Mtrfr	ENSMUSG00000047635	4.23812	4.52417	-0.278986	0.0133896	0.0983925
239188	Enox1	ENSMUSG00000022012	1.58415	2.05616	-0.457951	0.0134141	0.0984765
67460	Decr1	ENSMUSG00000028223	6.96866	7.17634	-0.208531	0.0134148	0.0984765
66617	Ntmt1	ENSMUSG00000026857	5.34499	5.57763	-0.238554	0.0134351	0.0985749
18302	Oit3	ENSMUSG00000009654	1.58406	2.24267	-0.657934	0.0134963	0.0989435
14904	Gtpbp1	ENSMUSG00000042535	5.68321	5.47556	0.204166	0.0135055	0.0989435
72960	Top1mt	ENSMUSG00000000934	5.32336	5.69166	-0.36721	0.0135061	0.0989435
20187	Ryk	ENSMUSG00000032547	6.49306	6.29224	0.20103	0.0135153	0.0989601
232946	Bloc1s3	ENSMUSG00000057667	4.7816	5.0591	-0.272266	0.0135388	0.0990177
73942	Fam151b	ENSMUSG00000034334	2.6578	3.0141	-0.357205	0.013543	0.0990177
72503	Bltp2	ENSMUSG00000010277	8.4699	8.67784	-0.207286	0.013544	0.0990177
14433	Gapdh	ENSMUSG00000057666	8.89662	8.64501	0.25744	0.0135543	0.0990349
330177	Taok3	ENSMUSG00000061288	5.50594	5.25112	0.253618	0.0135602	0.0990349
26886	Cenph	ENSMUSG00000045273	0.265857	-0.511372	0.769838	0.013593	0.0992237
56205	Ensa	ENSMUSG00000038619	7.31247	7.14324	0.170099	0.0136068	0.0992741
14733	Gpc1	ENSMUSG00000034220	5.83549	5.56372	0.271455	0.0136315	0.0994034
104010	Cdh22	ENSMUSG00000053166	1.38247	0.892701	0.481286	0.0136462	0.09946
68981	Snrpa1	ENSMUSG00000030512	4.84155	4.62723	0.207926	0.0136533	0.0994614
11416	Slc33a1	ENSMUSG00000027822	6.16339	6.40466	-0.240046	0.0136763	0.0995781
216850	Kdm6b	ENSMUSG00000018476	4.94282	4.54124	0.37629	0.0136887	0.0996172
18100	Mrpl40	ENSMUSG00000022706	4.93112	5.14054	-0.212648	0.0137004	0.0996519
15468	Prmt2	ENSMUSG00000020230	4.76607	4.53375	0.226511	0.0137325	0.0997621
101490	Inpp5f	ENSMUSG00000042105	5.60305	5.33347	0.274507	0.0137331	0.0997621
109294	Prex2	ENSMUSG00000048960	3.43177	3.83078	-0.397882	0.0137386	0.0997621
241950	Bbs12	ENSMUSG00000051444	3.14639	3.59272	-0.444292	0.0137476	0.0997621
72844	Kctd17	ENSMUSG00000033287	5.10645	4.83035	0.268289	0.0137504	0.0997621
230597	Zfyve9	ENSMUSG00000034557	5.73963	5.91933	-0.177632	0.0137636	0.0997935
12499	Entpd5	ENSMUSG00000021236	7.64886	7.90089	-0.253948	0.0137687	0.0997935
66700	Chmp3	ENSMUSG00000053119	7.9323	7.75325	0.178468	0.0137811	0.0998325
11845	Arf6	ENSMUSG00000044147	6.51323	6.30318	0.210295	0.0137887	0.0998374

## Sheet: Heaton_2012_ACC_upregulated
	SYMBOL	GENENAME	ENTREZ	logFC_M-N	AveExpr	t	P.Value	adj.P.Val	B		logFC_M-N: log2 expression value of ACC with membranous Beta-catenin minus log2 expression value of of ACC with nuclear Beta-catenin.
225016_at	APCDD1	APC down-regulated 1	147495	-3.03667	8.91992	-6.32577	5.88643e-08	0.00099939	7.96908
235182_at	ISM1	isthmin 1	140862	-3.72254	6.86543	-6.19189	9.59844e-08	0.00099939	7.52789
209982_s_at	NRXN2	neurexin 2	9379	-1.80197	6.47522	-5.85091	3.31625e-07	0.00172644	6.40783
204134_at	PDE2A	phosphodiesterase 2A	5138	-2.68162	9.55255	-5.69555	5.81376e-07	0.00242131	5.90017
207819_s_at	ABCB4	ATP binding cassette subfamily B member 4	5244	-3.42013	8.97364	-5.42229	1.54994e-06	0.00285014	5.013
204591_at	CHL1	cell adhesion molecule L1 like	10752	-3.03102	5.79055	-5.40411	1.65379e-06	0.00285014	4.95431
205139_s_at	UST	uronyl 2-sulfotransferase	10090	-1.95032	9.24651	-5.37729	1.81977e-06	0.00285014	4.86776
233504_at	SHOC1	shortage in chiasmata 1	158401	-3.27384	7.44386	-5.37123	1.85947e-06	0.00285014	4.84823
219165_at	PDLIM2	PDZ and LIM domain 2	64236	-1.14129	8.556	-5.33169	2.14045e-06	0.00297151	4.72088
222696_at	AXIN2	axin 2	8313	-1.64003	8.07966	-5.25839	2.77676e-06	0.00361396	4.48535
203348_s_at	ETV5	ETS variant transcription factor 5	2119	-1.30461	10.0313	-5.22549	3.11997e-06	0.00382178	4.37989
227314_at	ITGA2	integrin subunit alpha 2	3673	-1.98219	8.38318	-5.20145	3.39682e-06	0.00392974	4.30296
1554466_a_at	METTL26	methyltransferase like 26	84326	-0.840407	9.34628	-5.09659	4.91627e-06	0.00465348	3.96842
221765_at	UGCG	UDP-glucose ceramide glucosyltransferase	7357	-2.22082	9.45063	-5.06849	5.42649e-06	0.00475287	3.87909
224824_at	COX20	cytochrome c oxidase assembly factor COX20	116228	-1.33891	8.4261	-5.05828	5.62441e-06	0.00475287	3.84668
219501_at	ENOX1	ecto-NOX disulfide-thiol exchanger 1	55068	-0.986496	5.65536	-5.04389	5.91553e-06	0.00475287	3.80102
219693_at	AGPAT4	1-acylglycerol-3-phosphate O-acyltransferase 4	56895	-1.07873	6.56165	-5.03344	6.13623e-06	0.00475287	3.76788
235108_at	KCNK3	potassium two pore domain channel subfamily K member 3	3777	-1.65421	10.8318	-4.93534	8.64541e-06	0.00600107	3.45779
212793_at	DAAM2	dishevelled associated activator of morphogenesis 2	23500	-1.94848	9.33847	-4.91985	9.12446e-06	0.00612929	3.40902
218704_at	RNF43	ring finger protein 43	54894	-1.27151	8.64567	-4.8926	1.00318e-05	0.00652822	3.32328
203217_s_at	ST3GAL5	ST3 beta-galactoside alpha-2,3-sialyltransferase 5	8869	-1.41145	11.7367	-4.85745	1.13339e-05	0.00715202	3.21294
212922_s_at	SMYD2	SET and MYND domain containing 2	56950	-1.08355	10.5452	-4.83769	1.21373e-05	0.00722137	3.15102
232898_at	DAB2	DAB adaptor protein 2	1601	-1.71769	9.47202	-4.78519	1.45532e-05	0.00748434	2.98692
238736_at	REV3L	REV3 like, DNA directed polymerase zeta catalytic subunit	5980	-1.04822	8.48689	-4.78371	1.46274e-05	0.00748434	2.98233
220512_at	DLC1	DLC1 Rho GTPase activating protein	10395	-1.46485	5.90389	-4.78113	1.47584e-05	0.00748434	2.97427
205771_s_at	AKAP7	A-kinase anchoring protein 7	9465	-1.20329	10.5261	-4.77022	1.53241e-05	0.00748434	2.94027
207426_s_at	TNFSF4	TNF superfamily member 4	7292	-2.14046	7.38422	-4.76476	1.56153e-05	0.00748434	2.92326
220750_s_at	P3H1	prolyl 3-hydroxylase 1	64175	-0.985998	9.66388	-4.76109	1.5814e-05	0.00748434	2.91183
1553602_at	MUCL1	mucin like 1	118430	-2.32735	6.01536	-4.73382	1.73709e-05	0.00791977	2.82697
226992_at	NOSTRIN	nitric oxide synthase trafficking	115677	-2.30657	8.31075	-4.71319	1.86475e-05	0.00820185	2.7629
209955_s_at	FAP	fibroblast activation protein alpha	2191	-1.62573	6.45339	-4.70801	1.8982e-05	0.00820185	2.74683
229613_at	NKD1	NKD inhibitor of WNT signaling pathway 1	85407	-1.75122	6.27145	-4.7016	1.94045e-05	0.00820185	2.72694
226913_s_at	SOX8	SRY-box transcription factor 8	30812	-1.84719	6.18564	-4.66122	2.22847e-05	0.00875577	2.60192
212092_at	PEG10	paternally expressed 10	23089	-2.72585	10.0353	-4.62644	2.50972e-05	0.00933259	2.49457
227297_at	ITGA9	integrin subunit alpha 9	3680	-1.57389	10.2953	-4.61258	2.63124e-05	0.00961278	2.45188
204501_at	CCN3	cellular communication network factor 3	4856	-2.47808	11.461	-4.5861	2.87969e-05	0.0101638	2.37041
218684_at	LRRC8D	leucine rich repeat containing 8 VRAC subunit D	55144	-0.991371	10.246	-4.57957	2.94439e-05	0.0101696	2.35035
229823_at	RIMS2	regulating synaptic membrane exocytosis 2	9699	-1.90953	10.5826	-4.57053	3.0363e-05	0.0101981	2.3226
219407_s_at	LAMC3	laminin subunit gamma 3	10319	-1.83282	8.42781	-4.53754	3.39605e-05	0.010715	2.22154
221558_s_at	LEF1	lymphoid enhancer binding factor 1	51176	-2.39946	9.86707	-4.50364	3.80914e-05	0.0109132	2.11795
236378_at	CIB4	calcium and integrin binding family member 4	130106	-1.42587	6.88395	-4.50325	3.81424e-05	0.0109132	2.11674
39549_at	NPAS2	neuronal PAS domain protein 2	4862	-1.44329	7.37544	-4.50236	3.82571e-05	0.0109132	2.11404
225025_at	IGSF8	immunoglobulin superfamily member 8	93185	-0.560478	8.34001	-4.4726	4.23008e-05	0.0113827	2.02339
228068_at	GOLGA7B	golgin A7 family member B	401647	-0.684302	7.44904	-4.47026	4.2636e-05	0.0113827	2.01627
207584_at	LPA	lipoprotein(a)	4018	-0.699594	4.61111	-4.45338	4.51325e-05	0.011841	1.96495
201250_s_at	SLC2A1	solute carrier family 2 member 1	6513	-1.23449	8.80949	-4.42579	4.95216e-05	0.0122766	1.88126
201377_at	UBAP2L	ubiquitin associated protein 2 like	9898	-0.644374	9.63325	-4.37086	5.95339e-05	0.0139108	1.71527
214948_s_at	TMF1	TATA element modulatory factor 1	7110	-0.876924	8.91884	-4.36695	6.03161e-05	0.0139108	1.70351
203067_at	PDHX	pyruvate dehydrogenase complex component X	8050	-0.739387	10.3158	-4.36461	6.07897e-05	0.0139108	1.69646
203604_at	ZNF516	zinc finger protein 516	9658	-0.489654	7.20893	-4.35806	6.21362e-05	0.0140191	1.67672
209679_s_at	SMAGP	small cell adhesion glycoprotein	57228	-1.14503	8.76208	-4.35413	6.29566e-05	0.0140191	1.6649
238081_at	WDFY3-AS2	WDFY3 antisense RNA 2	404201	-1.27023	7.43735	-4.33235	6.77015e-05	0.0142404	1.59943
209447_at	SYNE1	spectrin repeat containing nuclear envelope protein 1	23345	-1.02464	9.18658	-4.33061	6.80941e-05	0.0142404	1.59422
225575_at	LIFR	LIF receptor subunit alpha	3977	-1.52023	8.97658	-4.32737	6.88349e-05	0.0142404	1.58447
219194_at	SEMA4G	semaphorin 4G	57715	-1.11092	8.14676	-4.32432	6.95377e-05	0.0142404	1.57532
204392_at	CAMK1	calcium/calmodulin dependent protein kinase I	8536	-1.48968	9.37766	-4.32339	6.97522e-05	0.0142404	1.57255
205597_at	SLC44A4	solute carrier family 44 member 4	80736	-0.99873	7.45364	-4.30934	7.30924e-05	0.0147774	1.53042
223740_at	AGPAT4-IT1	AGPAT4 intronic transcript 1	79992	-0.531341	6.65711	-4.30332	7.45688e-05	0.014931	1.51241
232478_at	MIR181A2HG	MIR181A2 host gene	100379345	-0.991803	6.78162	-4.2959	7.64311e-05	0.0151581	1.49019
227337_at	ANKRD37	ankyrin repeat domain 37	353322	-1.47962	8.32714	-4.2924	7.73238e-05	0.0151905	1.47974
227984_at	LMF1	lipase maturation factor 1	64788	-1.97517	6.84295	-4.26877	8.36307e-05	0.0159773	1.40914
232083_at	KIF16B	kinesin family member 16B	55614	-1.49162	8.55866	-4.25626	8.7168e-05	0.0162704	1.37185
204805_s_at	H1-10	H1.10 linker histone	8971	-0.828224	9.93514	-4.25239	8.82902e-05	0.0162704	1.36033
201624_at	DARS1	aspartyl-tRNA synthetase 1	1615	-0.699944	9.56481	-4.22733	9.5913e-05	0.017218	1.28581
227782_at	ZBTB7C	zinc finger and BTB domain containing 7C	201501	-0.989688	8.92377	-4.21265	0.000100673	0.0176169	1.24223
212148_at	PBX1	PBX homeobox 1	5087	-1.06619	10.989	-4.20421	0.000103512	0.0177162	1.21721
225681_at	CTHRC1	collagen triple helix repeat containing 1	115908	-2.25103	8.1755	-4.18918	0.00010876	0.0180707	1.17273
203229_s_at	CLK2	CDC like kinase 2	1196	-0.681548	10.0072	-4.18718	0.000109478	0.0180707	1.1668
225123_at	SESN3	sestrin 3	143686	-1.1061	8.45101	-4.1856	0.000110049	0.0180707	1.16212
232004_at	HNRNPR	heterogeneous nuclear ribonucleoprotein R	10236	-0.738704	7.8846	-4.17939	0.000112319	0.0180707	1.14377
229072_at	RAB30	RAB30, member RAS oncogene family	27314	-1.30876	8.53467	-4.17627	0.000113477	0.0180707	1.13454
226201_at	DOT1L	DOT1 like histone lysine methyltransferase	84444	-0.820213	7.26281	-4.17208	0.000115048	0.0180707	1.12217
227812_at	TNFRSF19	TNF receptor superfamily member 19	55504	-1.68653	5.8185	-4.15955	0.000119875	0.0183938	1.08522
209604_s_at	GATA3	GATA binding protein 3	2625	-1.94448	7.36039	-4.14631	0.000125194	0.0188916	1.04619
226446_at	HES6	hes family bHLH transcription factor 6	55502	-1.53431	8.56452	-4.1323	0.000131068	0.0189538	1.00498
241233_x_at	ANKRD20A11P	ankyrin repeat domain 20 family member A11, pseudogene	391267	-1.31734	7.70755	-4.12016	0.000136369	0.0194504	0.969342
242722_at	LMO7	LIM domain 7	4008	-0.856494	6.91837	-4.09192	0.000149529	0.0203538	0.886577
231075_x_at	ABI2	abl interactor 2	10152	-0.695199	6.87866	-4.09086	0.000150045	0.0203538	0.883481
243792_x_at	PTPN13	protein tyrosine phosphatase non-receptor type 13	5783	-0.649552	5.58615	-4.08989	0.000150523	0.0203538	0.880625
235745_at	ERN1	endoplasmic reticulum to nucleus signaling 1	2081	-1.54764	8.80228	-4.08771	0.000151593	0.0203663	0.874259
1555241_at	RBIS	ribosomal biogenesis factor	401466	-0.81793	6.13681	-4.06431	0.000163579	0.0214238	0.805918
217836_s_at	YY1AP1	YY1 associated protein 1	55249	-0.736492	9.66776	-4.0559	0.000168105	0.0218789	0.781412
202465_at	PCOLCE	procollagen C-endopeptidase enhancer	5118	-2.10221	10.1865	-4.04686	0.000173106	0.0222516	0.755096
216223_at	CPN2	carboxypeptidase N subunit 2	1370	-1.48752	6.75183	-4.03896	0.000177593	0.02255	0.732123
226448_at	FAM89A	family with sequence similarity 89 member A	375061	-1.1365	8.65266	-4.03221	0.000181518	0.0227706	0.712505
239360_at	LYPLAL1-AS1	LYPLAL1 antisense RNA 1	102723886	-1.51222	6.2581	-4.01779	0.000190185	0.0234761	0.670645
226676_at	ZNF521	zinc finger protein 521	25925	-1.53066	9.54442	-4.01752	0.000190348	0.0234761	0.669876
1554704_at	ATP8B3	ATPase phospholipid transporting 8B3	148229	-0.934042	6.63335	-4.01636	0.000191067	0.0234761	0.666496
227263_at	C8orf58	chromosome 8 open reading frame 58	541565	-0.512888	7.78093	-4.00664	0.000197158	0.023661	0.63834
225541_at	RPL22L1	ribosomal protein L22 like 1	200916	-0.996357	10.2967	-4.00507	0.000198158	0.023661	0.633799
225217_s_at	BRPF3	bromodomain and PHD finger containing 3	27154	-1.48317	9.2592	-3.99924	0.000201926	0.023661	0.616901
37892_at	COL11A1	collagen type XI alpha 1 chain	1301	-3.30065	7.50047	-3.99896	0.000202103	0.023661	0.616114
230109_at	PDE7B	phosphodiesterase 7B	27115	-1.52447	8.17554	-3.99874	0.00020225	0.023661	0.615463
235210_s_at	SBSPON	somatomedin B and thrombospondin type 1 domain containing	157869	-2.34028	6.7027	-3.99545	0.000204407	0.0237745	0.605947
205668_at	LY75	lymphocyte antigen 75	4065	-2.23684	6.62935	-3.99379	0.000205503	0.0237745	0.601149
227864_s_at	MVB12A	multivesicular body subunit 12A	93343	-0.549665	9.9002	-3.98451	0.000211742	0.024227	0.574327
226925_at	PXYLP1	2-phosphoxylose phosphatase 1	92370	-1.69062	8.81882	-3.96653	0.000224348	0.0253343	0.522466
208711_s_at	CCND1	cyclin D1	595	-1.57932	8.69823	-3.96377	0.000226347	0.0253343	0.514513
235567_at	RORA	RAR related orphan receptor A	6095	-1.29699	8.78334	-3.96218	0.000227503	0.0253343	0.509949
1555920_at	CBX3	chromobox 3	11335	-1.08196	7.94516	-3.95894	0.000229887	0.0254636	0.500603
228047_at	SNORA72	small nucleolar RNA, H/ACA box 72	26775	-0.818662	6.43684	-3.95149	0.000235445	0.0255623	0.479187
231622_at	ASB17	ankyrin repeat and SOCS box containing 17	127247	-1.23862	4.77493	-3.94955	0.000236915	0.0255623	0.473607
235206_at	CNBD2	cyclic nucleotide binding domain containing 2	140894	-0.817531	7.74884	-3.94036	0.000244	0.0256426	0.447197
201584_s_at	DDX39A	DExD-box helicase 39A	10212	-0.85258	10.4278	-3.94033	0.00024403	0.0256426	0.447087
213801_x_at	RPSA	ribosomal protein SA	3921	-0.347299	13.342	-3.93019	0.000252082	0.0259869	0.417996
230407_at	SBNO1	strawberry notch homolog 1	55206	-0.770151	9.07336	-3.91128	0.000267795	0.0267013	0.363819
201505_at	LAMB1	laminin subunit beta 1	3912	-1.48256	9.57919	-3.91006	0.000268833	0.0267013	0.360354
238780_s_at	KCNJ5	potassium inwardly rectifying channel subfamily J member 5	3762	-2.20459	8.94994	-3.90956	0.00026927	0.0267013	0.358901
213197_at	ASTN1	astrotactin 1	460	-2.02233	8.96787	-3.90034	0.000277308	0.0269082	0.332554
234314_at	RALGAPA2	Ral GTPase activating protein catalytic subunit alpha 2	57186	-2.61457	8.27772	-3.89951	0.000278039	0.0269082	0.330196
204753_s_at	HLF	HLF transcription factor, PAR bZIP family member	3131	-2.24645	7.54809	-3.8984	0.000279029	0.0269082	0.327012
218862_at	ASB13	ankyrin repeat and SOCS box containing 13	79754	-0.683495	9.58871	-3.89818	0.000279223	0.0269082	0.32639
223033_s_at	SCYL1	SCY1 like pseudokinase 1	57410	-0.51154	8.68472	-3.89589	0.000281273	0.0269082	0.31984
241716_at	HSPD1	heat shock protein family D (Hsp60) member 1	3329	-1.59562	7.47411	-3.89542	0.000281694	0.0269082	0.318501
225295_at	SLC39A10	solute carrier family 39 member 10	57181	-1.14237	9.92276	-3.88372	0.000292391	0.0273924	0.285127
221911_at	ETV1	ETS variant transcription factor 1	2115	-1.71958	9.66154	-3.8827	0.000293339	0.0273924	0.282227
208692_at	RPS3	ribosomal protein S3	6188	-0.476787	12.8212	-3.87459	0.000301014	0.0274473	0.259106
236172_at	LTB4R	leukotriene B4 receptor	1241	-0.782916	7.05109	-3.87416	0.000301425	0.0274473	0.257882
219871_at	KLF3-AS1	KLF3 antisense RNA 1	79667	-1.47082	6.24856	-3.87236	0.000303153	0.0274473	0.252765
201565_s_at	ID2	inhibitor of DNA binding 2	3398	-1.15466	11.7112	-3.86522	0.000310114	0.0279432	0.232445
200762_at	DPYSL2	dihydropyrimidinase like 2	1808	-0.898711	11.6425	-3.86082	0.000314472	0.0279432	0.219955
225017_at	CCDC14	coiled-coil domain containing 14	64770	-0.704989	9.56025	-3.8606	0.000314695	0.0279432	0.219321
230847_at	WRNIP1	WRN helicase interacting protein 1	56897	-0.617809	6.27665	-3.85862	0.000316682	0.0279432	0.213686
203080_s_at	BAZ2B	bromodomain adjacent to zinc finger domain 2B	29994	-0.704548	9.85031	-3.84999	0.00032547	0.0284773	0.189191
213880_at	LGR5	leucine rich repeat containing G protein-coupled receptor 5	8549	-2.11579	5.33692	-3.84675	0.000328828	0.0286463	0.180009
228171_s_at	PLEKHG4	pleckstrin homology and RhoGEF domain containing G4	25894	-1.05021	8.88823	-3.83438	0.000341973	0.0292478	0.144939
212818_s_at	ASB1	ankyrin repeat and SOCS box containing 1	51665	-0.515149	8.12485	-3.83391	0.00034248	0.0292478	0.143613
226572_at	SOCS7	suppressor of cytokine signaling 7	30837	-0.793025	9.00315	-3.83275	0.000343742	0.0292478	0.140324
229744_at	ITPRID2	ITPR interacting domain containing 2	6744	-0.807231	7.09367	-3.83241	0.000344108	0.0292478	0.139371
226452_at	PDK1	pyruvate dehydrogenase kinase 1	5163	-1.32192	10.21	-3.82977	0.000347002	0.0293203	0.131882
205967_at	H4C3	H4 clustered histone 3	8364	-0.569386	10.5196	-3.82899	0.000347856	0.0293203	0.129683
225450_at	AMOTL1	angiomotin like 1	154810	-0.946751	8.89243	-3.82778	0.000349185	0.0293203	0.126271
209711_at	SLC35D1	solute carrier family 35 member D1	23169	-0.776134	9.67491	-3.82318	0.000354305	0.0293946	0.113251
227198_at	AFF3	ALF transcription elongation factor 3	3899	-2.56961	6.24169	-3.81628	0.000362118	0.029688	0.0937445
206294_at	HSD3B2	hydroxy-delta-5-steroid dehydrogenase, 3 beta- and steroid delta-isomerase 2	3284	-2.61621	11.7936	-3.81386	0.000364896	0.0297984	0.08691
216218_s_at	PLCL2	phospholipase C like 2	23228	-1.7218	7.47996	-3.80372	0.000376761	0.0302921	0.0583003
201314_at	STK25	serine/threonine kinase 25	10494	-0.660938	8.62935	-3.79616	0.000385837	0.030544	0.0370201
209389_x_at	DBI	diazepam binding inhibitor, acyl-CoA binding protein	1622	-0.651051	10.7129	-3.78798	0.000395908	0.0306008	0.0139867
201892_s_at	IMPDH2	inosine monophosphate dehydrogenase 2	3615	-0.587196	11.7291	-3.78407	0.000400808	0.0306008	0.00299447
233914_s_at	SBF2	SET binding factor 2	81846	-0.603137	6.9135	-3.78378	0.000401172	0.0306008	0.0021826
1556316_s_at	MIF-AS1	MIF antisense RNA 1	284889	-0.282929	6.49994	-3.77426	0.000413373	0.0308704	-0.0245903
242006_at	LCA5	lebercilin LCA5	167691	-0.462656	5.14358	-3.77147	0.000417009	0.0308704	-0.0324153
228940_at	NDUFB4	NADH:ubiquinone oxidoreductase subunit B4	4710	-0.603382	6.88363	-3.76962	0.000419442	0.0308704	-0.0376135
219779_at	ZFHX4	zinc finger homeobox 4	79776	-1.49118	9.5143	-3.763	0.00042825	0.0311483	-0.0561795
223679_at	CTNNB1	catenin beta 1	1499	-1.24706	9.39273	-3.76219	0.000429339	0.0311483	-0.0584482
235048_at	FAM169A	family with sequence similarity 169 member A	26049	-1.81657	8.68929	-3.76111	0.000430787	0.0311483	-0.0614552
235343_at	VASH2	vasohibin 2	79805	-0.564924	4.55657	-3.75658	0.000436959	0.0312213	-0.0741622
1554106_at	NBEAL1	neurobeachin like 1	65065	-1.12249	7.60301	-3.75578	0.000438051	0.0312213	-0.0763931
203550_s_at	ENTREP3	endosomal transmembrane epsin interactor 3	10712	-0.691484	10.1609	-3.75539	0.000438592	0.0312213	-0.0774938
222629_at	REV1	REV1 DNA directed polymerase	51455	-0.989992	7.70883	-3.7477	0.000449285	0.0316078	-0.0990076
227931_at	INO80D	INO80 complex subunit D	54891	-0.808682	7.65959	-3.74073	0.000459204	0.0320888	-0.118508
201594_s_at	PPP4R1	protein phosphatase 4 regulatory subunit 1	9989	-0.607811	9.84242	-3.73329	0.000470017	0.0324411	-0.139289
218274_s_at	ANKZF1	ankyrin repeat and zinc finger peptidyl tRNA hydrolase 1	55139	-0.53472	8.66104	-3.73229	0.000471482	0.0324411	-0.142068
226508_at	PHC3	polyhomeotic homolog 3	80012	-0.449839	10.286	-3.73151	0.000472632	0.0324411	-0.144243
242957_at	VWCE	von Willebrand factor C and EGF domains	220001	-0.487041	7.07299	-3.73091	0.000473525	0.0324411	-0.145928
241817_at	C3orf62	chromosome 3 open reading frame 62	375341	-0.650589	6.89953	-3.7277	0.00047829	0.0326554	-0.154866
200827_at	PLOD1	procollagen-lysine,2-oxoglutarate 5-dioxygenase 1	5351	-0.559512	9.5003	-3.72304	0.000485305	0.0330261	-0.167863
228181_at	SLC30A1	solute carrier family 30 member 1	7779	-1.1384	8.59308	-3.71852	0.000492198	0.0330849	-0.180452
209393_s_at	EIF4E2	eukaryotic translation initiation factor 4E family member 2	9470	-0.70803	9.26364	-3.71531	0.000497148	0.0332881	-0.189383
207981_s_at	ESRRG	estrogen related receptor gamma	2104	-1.7919	8.68378	-3.71103	0.000503829	0.0333807	-0.201296
226647_at	TMEM25	transmembrane protein 25	84866	-0.844345	7.83793	-3.70693	0.000510318	0.0335595	-0.212715
221214_s_at	NSMF	NMDA receptor synaptonuclear signaling and neuronal migration factor	26012	-1.1891	8.4148	-3.69525	0.000529215	0.0343314	-0.245157
229144_at	KAZN	kazrin, periplakin interacting protein	23254	-1.2274	8.65581	-3.69258	0.000533625	0.0343603	-0.252559
1552289_a_at	CILP2	cartilage intermediate layer protein 2	148113	-0.878706	5.80166	-3.68808	0.000541141	0.0346	-0.265035
212977_at	ACKR3	atypical chemokine receptor 3	57007	-1.89548	7.48233	-3.68777	0.000541664	0.0346	-0.265897
229127_at	JAM2	junctional adhesion molecule 2	58494	-1.75206	7.41177	-3.6832	0.000549423	0.0349883	-0.278582
228515_at	POLR1A	RNA polymerase I subunit A	25885	-0.646653	8.65094	-3.67748	0.000559264	0.0350255	-0.294413
222549_at	CLDN1	claudin 1	9076	-1.50286	9.72592	-3.67654	0.000560898	0.0350255	-0.297016
226695_at	PRRX1	paired related homeobox 1	5396	-1.85895	8.23223	-3.66751	0.000576826	0.0354331	-0.321982
211518_s_at	BMP4	bone morphogenetic protein 4	652	-1.28822	9.17582	-3.6661	0.000579363	0.0354843	-0.325894
1554063_at	ZHX1-C8orf76	ZHX1-C8orf76 readthrough	100533106	-0.361704	6.73566	-3.65238	0.000604508	0.0368078	-0.363766
212875_s_at	C2CD2	C2 calcium dependent domain containing 2	25966	-1.23098	12.3083	-3.64989	0.000609175	0.0369299	-0.370621
242304_at	PYM1	PYM homolog 1, exon junction complex associated factor	84305	-0.677106	7.74124	-3.64762	0.000613474	0.0370289	-0.376887
231040_at	RORB	RAR related orphan receptor B	6096	-1.82539	7.95674	-3.64227	0.000623688	0.0374285	-0.391601
203759_at	ST3GAL4	ST3 beta-galactoside alpha-2,3-sialyltransferase 4	6484	-0.63017	9.02898	-3.63539	0.000637096	0.0380805	-0.410552
213906_at	MYBL1	MYB proto-oncogene like 1	4603	-0.973266	7.19788	-3.63435	0.000639139	0.0380805	-0.413405
228238_at	GAS5	growth arrest specific 5	60674	-0.877865	9.20041	-3.63104	0.000645709	0.0380805	-0.422515
236492_at	PPP2R2A	protein phosphatase 2 regulatory subunit Balpha	5520	-0.748451	8.31917	-3.62772	0.000652352	0.0381589	-0.431633
206091_at	MATN3	matrilin 3	4148	-1.08826	4.52997	-3.62603	0.000655755	0.0382505	-0.436267
1559529_at	PTK2	protein tyrosine kinase 2	5747	-0.85955	6.34347	-3.62249	0.000662943	0.0383718	-0.445977
204040_at	RNF144A	ring finger protein 144A	9781	-0.789141	10.3829	-3.62139	0.000665204	0.0383718	-0.44901
243027_at	IGSF5	immunoglobulin superfamily member 5	150084	-1.39931	7.35457	-3.61999	0.00066807	0.0384306	-0.452839
213513_x_at	ARPC2	actin related protein 2/3 complex subunit 2	10109	-0.532045	10.7001	-3.61605	0.000676228	0.0387928	-0.463647
223948_s_at	TMPRSS3	transmembrane serine protease 3	64699	-0.60549	7.69862	-3.61386	0.000680802	0.0389478	-0.46965
225745_at	LRP6	LDL receptor related protein 6	4040	-0.815523	9.27416	-3.60091	0.000708477	0.0393476	-0.505126
209081_s_at	COL18A1	collagen type XVIII alpha 1 chain	80781	-1.20647	9.29335	-3.60086	0.000708575	0.0393476	-0.50525
232914_s_at	SYTL2	synaptotagmin like 2	54843	-1.98771	9.33947	-3.59351	0.000724751	0.0397164	-0.525341
213216_at	OTUD3	OTU deubiquitinase 3	23252	-0.74882	8.4563	-3.5916	0.000729018	0.0398454	-0.530566
230097_at	GART	phosphoribosylglycinamide formyltransferase, phosphoribosylglycinamide synthetase, phosphoribosylaminoimidazole synthetase	2618	-0.926723	8.97147	-3.58833	0.000736365	0.0401415	-0.53949
214722_at	NOTCH2NLA	notch 2 N-terminal like A	388677	-0.864722	9.94813	-3.58739	0.000738484	0.0401519	-0.542047
204033_at	TRIP13	thyroid hormone receptor interactor 13	9319	-1.32592	7.27521	-3.58405	0.000746094	0.0402961	-0.551171
202844_s_at	RALBP1	ralA binding protein 1	10928	-0.729751	9.8162	-3.58368	0.000746941	0.0402961	-0.55218
203440_at	CDH2	cadherin 2	1000	-1.99108	10.2555	-3.57604	0.000764635	0.0410781	-0.573011
206209_s_at	CA4	carbonic anhydrase 4	762	-1.06405	5.55431	-3.57572	0.000765381	0.0410781	-0.573878
239740_at	ETV6	ETS variant transcription factor 6	2120	-0.747289	7.79776	-3.57083	0.000776918	0.0411733	-0.587188
221730_at	COL5A2	collagen type V alpha 2 chain	1290	-1.38052	7.46124	-3.56902	0.000781233	0.0411858	-0.592115
1559028_at	CYP4F35P	cytochrome P450 family 4 subfamily F member 35, pseudogene	284233	-1.33094	7.12759	-3.56751	0.000784859	0.0412725	-0.596233
226665_at	AHSA2P	activator of HSP90 ATPase homolog 2, pseudogene	130872	-1.01694	8.31836	-3.56625	0.000787888	0.0413274	-0.59966
226679_at	SLC26A11	solute carrier family 26 member 11	284129	-0.645701	11.0509	-3.56376	0.000793907	0.041378	-0.606428
222253_s_at	POM121L9P	POM121 transmembrane nucleoporin like 9, pseudogene	29774	-0.953689	4.91107	-3.56289	0.000796021	0.041378	-0.608793
205174_s_at	QPCT	glutaminyl-peptide cyclotransferase	25797	-2.18472	11.7211	-3.55982	0.000803534	0.0414643	-0.617148
212598_at	WDFY3	WD repeat and FYVE domain containing 3	23001	-0.626477	7.70159	-3.55717	0.000810066	0.0416514	-0.624348
220615_s_at	FAR2	fatty acyl-CoA reductase 2	55711	-1.33813	6.389	-3.55594	0.000813111	0.041705	-0.627685
211975_at	ARFGAP2	ADP ribosylation factor GTPase activating protein 2	84364	-0.498949	9.70606	-3.55396	0.000818046	0.0417524	-0.633064
202492_at	ATG9A	autophagy related 9A	79065	-0.536945	9.46079	-3.55133	0.00082463	0.0418507	-0.640192
228191_at	FLVCR1	FLVCR heme transporter 1	28982	-1.15404	8.34094	-3.55053	0.000826632	0.0418507	-0.642348
205622_at	SMPD2	sphingomyelin phosphodiesterase 2	6610	-0.473384	7.09356	-3.55039	0.000827	0.0418507	-0.642744
213967_at	RALYL	RALY RNA binding protein like	138046	-1.90991	8.29951	-3.54955	0.00082911	0.0418507	-0.645009
231865_at	NCKAP5L	NCK associated protein 5 like	57701	-0.469128	8.40481	-3.5487	0.000831283	0.0418507	-0.647336
202767_at	ACP2	acid phosphatase 2, lysosomal	53	-0.445171	9.97126	-3.54744	0.000834475	0.0418507	-0.650743
212719_at	PHLPP1	PH domain and leucine rich repeat protein phosphatase 1	23239	-0.859265	9.04756	-3.54743	0.000834488	0.0418507	-0.650758
203476_at	TPBG	trophoblast glycoprotein	7162	-1.64051	8.78162	-3.54286	0.000846214	0.0420562	-0.663162
212134_at	PHLDB1	pleckstrin homology like domain family B member 1	23187	-0.433234	8.99731	-3.54157	0.000849546	0.0421038	-0.666656
202704_at	TOB1	transducer of ERBB2, 1	10140	-0.83309	11.2074	-3.54061	0.000852032	0.0421038	-0.669253
212624_s_at	CHN1	chimerin 1	1123	-0.933218	10.2099	-3.54015	0.000853237	0.0421038	-0.670509
203077_s_at	SMAD2	SMAD family member 2	4087	-0.859354	9.21728	-3.5301	0.000879741	0.0430041	-0.697697
213414_s_at	RPS19	ribosomal protein S19	6223	-0.36038	13.7484	-3.52572	0.000891528	0.0432461	-0.709523
204724_s_at	COL9A3	collagen type IX alpha 3 chain	1299	-0.907522	6.19773	-3.52518	0.000892999	0.0432461	-0.710988
207283_at	RPL23AP32	ribosomal protein L23a pseudogene 32	56969	-0.608014	7.85396	-3.51966	0.000908103	0.0436922	-0.725889
225532_at	CABLES1	Cdk5 and Abl enzyme substrate 1	91768	-0.95157	7.41022	-3.51911	0.000909638	0.0436922	-0.727391
210132_at	EFNA3	ephrin A3	1944	-0.791537	8.47207	-3.51183	0.000929967	0.0444425	-0.747024
203409_at	DDB2	damage specific DNA binding protein 2	1643	-0.835083	9.95566	-3.51164	0.000930509	0.0444425	-0.747542
218370_s_at	S100PBP	S100P binding protein	64766	-0.758156	8.99485	-3.50859	0.000939163	0.0445891	-0.755763
222357_at	ZBTB20	zinc finger and BTB domain containing 20	26137	-0.879154	9.26924	-3.50002	0.000963875	0.0452382	-0.778829
228564_at	LINC01116	long intergenic non-protein coding RNA 1116	375295	-1.39391	8.86207	-3.49998	0.000963979	0.0452382	-0.778925
1552579_a_at	ADAM21	ADAM metallopeptidase domain 21	8747	-0.434199	5.26149	-3.49775	0.000970519	0.0452878	-0.784928
203648_at	TATDN2	TatD DNase domain containing 2	9797	-0.366596	9.42357	-3.49623	0.000975001	0.0452878	-0.78902
228813_at	HDAC4	histone deacetylase 4	9759	-0.835312	8.08698	-3.49611	0.000975363	0.0452878	-0.789349
205923_at	RELN	reelin	5649	-2.16195	8.81009	-3.49573	0.000976479	0.0452878	-0.790364
215566_x_at	LYPLA2	lysophospholipase 2	11313	-0.444436	9.31344	-3.49259	0.000985821	0.0454176	-0.798818
213111_at	PIKFYVE	phosphoinositide kinase, FYVE-type zinc finger containing	200576	-0.568087	9.71631	-3.49032	0.000992591	0.045528	-0.804893
225711_at	ARL6IP6	ADP ribosylation factor like GTPase 6 interacting protein 6	151188	-0.877776	6.18541	-3.4883	0.000998685	0.0455528	-0.810327
225817_at	CGNL1	cingulin like 1	84952	-1.83635	9.45806	-3.48416	0.00101125	0.0457544	-0.821427
207688_s_at	INHBC	inhibin subunit beta C	3626	-0.585843	6.29583	-3.48224	0.00101716	0.0457544	-0.826597
238933_at	IRS1	insulin receptor substrate 1	3667	-1.09258	8.7604	-3.47478	0.00104035	0.0459978	-0.846599
222361_at	TUBBP5	tubulin beta pseudogene 5	643224	-1.24436	7.34859	-3.47406	0.00104259	0.0459978	-0.848514
225547_at	SNHG6	small nucleolar RNA host gene 6	641638	-0.559706	11.8789	-3.46996	0.00105559	0.0463746	-0.859505
1562321_at	PDK4	pyruvate dehydrogenase kinase 4	5166	-1.76457	9.38974	-3.46497	0.00107157	0.0467806	-0.872835
200823_x_at	RPL29	ribosomal protein L29	6159	-0.321768	13.2583	-3.4561	0.00110059	0.0477475	-0.896543
202252_at	RAB13	RAB13, member RAS oncogene family	5872	-0.413252	12.0363	-3.45539	0.00110296	0.0477505	-0.898445
33307_at	RRP7A	ribosomal RNA processing 7 homolog A	27341	-0.797143	8.11898	-3.4537	0.00110858	0.0478941	-0.902951
1555388_s_at	SNX25	sorting nexin 25	83891	-0.634919	6.80193	-3.44992	0.00112126	0.0481531	-0.913037
203069_at	SV2A	synaptic vesicle glycoprotein 2A	9900	-1.44434	8.49562	-3.44335	0.00114363	0.0484375	-0.930554
208025_s_at	HMGA2	high mobility group AT-hook 2	8091	-1.82102	5.75815	-3.44312	0.00114441	0.0484375	-0.931163
227996_at	FARP1	FERM, ARH/RhoGEF and pleckstrin domain protein 1	10160	-1.78238	9.31361	-3.43828	0.00116117	0.0487369	-0.94405
232931_at	SNRNP200	small nuclear ribonucleoprotein U5 subunit 200	23020	-0.56334	7.24267	-3.43754	0.00116376	0.0487369	-0.946028
215321_at	RUNDC3B	RUN domain containing 3B	154661	-1.09328	9.88542	-3.43452	0.00117435	0.0489634	-0.954055
226447_at	ASH1L	ASH1 like histone lysine methyltransferase	55870	-0.612328	9.78379	-3.43415	0.00117565	0.0489634	-0.955033
224794_s_at	CERCAM	cerebral endothelial cell adhesion molecule	51148	-0.522178	7.34692	-3.43213	0.00118281	0.0490654	-0.960417
230710_at	MIR210HG	MIR210 host gene	100506211	-1.11726	7.0136	-3.42926	0.00119304	0.049217	-0.968048
225169_at	INTS4	integrator complex subunit 4	92105	-0.423219	8.48613	-3.42642	0.00120323	0.049518	-0.975589
217871_s_at	MIF	macrophage migration inhibitory factor	4282	-0.396348	13.363	-3.42433	0.00121081	0.0497315	-0.98115
212399_s_at	VGLL4	vestigial like family member 4	9686	-0.503712	9.81831	-3.42317	0.00121501	0.0498059	-0.984221
1557091_at	MAMSTR	MEF2 activating motif and SAP domain containing transcriptional regulator	284358	-0.807154	9.2492	-3.42234	0.00121806	0.0498326	-0.986439
229596_at	AMDHD1	amidohydrolase domain containing 1	144193	-1.42333	8.33451	-3.41997	0.00122671	0.0500884	-0.992714
212329_at	SCAP	SREBF chaperone	22937	-0.851997	10.9465	-3.4117	0.00125745	0.0509437	-1.01464
221677_s_at	DONSON	DNA replication fork stabilization factor DONSON	29980	-0.857846	7.06505	-3.40571	0.00128017	0.0517636	-1.0305
219732_at	PLPPR1	phospholipid phosphatase related 1	54886	-1.54717	5.02103	-3.40092	0.00129863	0.0521052	-1.04318
226325_at	ADSS1	adenylosuccinate synthase 1	122622	-1.23371	7.57659	-3.39984	0.00130281	0.0521726	-1.04603
205381_at	LRRC17	leucine rich repeat containing 17	10234	-1.38471	6.68896	-3.39332	0.00132841	0.0528924	-1.06325
218195_at	ARMT1	acidic residue methyltransferase 1	79624	-0.918168	8.84705	-3.38957	0.00134334	0.0533417	-1.07315
222494_at	FOXN3	forkhead box N3	1112	-0.639839	10.3901	-3.38921	0.00134481	0.0533417	-1.07412
205076_s_at	MTMR11	myotubularin related protein 11	10903	-0.852206	9.65449	-3.38505	0.00136155	0.0537022	-1.08507
206301_at	TEC	tec protein tyrosine kinase	7006	-0.358646	5.93991	-3.38503	0.00136164	0.0537022	-1.08512
205255_x_at	TCF7	transcription factor 7	6932	-0.597341	9.32839	-3.38211	0.00137354	0.053896	-1.09283
226454_at	MARCHF9	membrane associated ring-CH-type finger 9	92979	-0.539526	8.2723	-3.38148	0.00137614	0.053896	-1.0945
1559170_at	ANKRD20A5P	ankyrin repeat domain 20 family member A5, pseudogene	440482	-1.38475	5.88703	-3.37783	0.00139114	0.0542493	-1.10409
224610_at	SNHG1	small nucleolar RNA host gene 1	23642	-0.824236	9.61675	-3.37637	0.00139721	0.0543842	-1.10795
223354_x_at	MFF	mitochondrial fission factor	56947	-0.560883	10.698	-3.37524	0.00140193	0.054466	-1.11093
240479_at	HS3ST5	heparan sulfate-glucosamine 3-sulfotransferase 5	222537	-0.511039	5.8762	-3.37329	0.00141007	0.0545019	-1.11606
219463_at	LAMP5	lysosomal associated membrane protein family member 5	24141	-2.20865	7.11074	-3.36925	0.0014271	0.0547236	-1.12668
208606_s_at	WNT4	Wnt family member 4	54361	-1.95592	7.98141	-3.36867	0.00142958	0.0547236	-1.12821
226473_at	CBX2	chromobox 2	84733	-0.786949	6.76501	-3.36635	0.00143944	0.0548116	-1.1343
226222_at	RIC1	RIC1 homolog, RAB6A GEF complex partner 1	57589	-0.372316	6.78654	-3.36607	0.00144066	0.0548116	-1.13504
201564_s_at	FSCN1	fascin actin-bundling protein 1	6624	-1.10304	9.86796	-3.36553	0.00144297	0.0548116	-1.13646
212762_s_at	TCF7L2	transcription factor 7 like 2	6934	-0.809336	8.34492	-3.36354	0.00145151	0.0548116	-1.14168
222258_s_at	SH3BP4	SH3 domain binding protein 4	23677	-1.24938	10.3712	-3.36286	0.00145446	0.0548116	-1.14347
219373_at	DPM3	dolichyl-phosphate mannosyltransferase subunit 3, regulatory	54344	-0.551247	9.676	-3.35778	0.00147652	0.0554239	-1.15679
203824_at	TSPAN8	tetraspanin 8	7103	-2.28784	7.11248	-3.35456	0.0014907	0.05566	-1.16524
218683_at	PTBP2	polypyrimidine tract binding protein 2	58155	-0.739267	8.31412	-3.34904	0.0015153	0.0557501	-1.17971
224002_s_at	FKBP7	FKBP prolyl isomerase 7	51661	-0.806992	6.86007	-3.34644	0.00152702	0.0560696	-1.18653
232458_at	COL3A1	collagen type III alpha 1 chain	1281	-1.79799	6.7047	-3.3457	0.00153038	0.0560696	-1.18847
214271_x_at	RPL12	ribosomal protein L12	6136	-0.35153	12.9771	-3.34533	0.00153206	0.0560696	-1.18944
203524_s_at	MPST	mercaptopyruvate sulfurtransferase	4357	-0.548171	9.52552	-3.34099	0.00155184	0.0564214	-1.20078
219126_at	PHF10	PHD finger protein 10	55274	-0.899197	9.99383	-3.3366	0.00157212	0.056692	-1.21226
224937_at	PTGFRN	prostaglandin F2 receptor inhibitor	5738	-1.15255	9.7877	-3.33565	0.00157653	0.056692	-1.21473
221935_s_at	EOGT	EGF domain specific O-linked N-acetylglucosamine transferase	285203	-0.959012	6.65422	-3.33347	0.00158674	0.0568715	-1.22044
201934_at	WDR82	WD repeat domain 82	80335	-0.269752	11.097	-3.32971	0.00160445	0.057311	-1.23024
219648_at	MREG	melanoregulin	55686	-1.63784	7.6165	-3.32854	0.00161001	0.057311	-1.23331
209377_s_at	HMGN3	high mobility group nucleosomal binding domain 3	9324	-0.508612	12.2982	-3.32585	0.00162287	0.0576701	-1.24033
226291_at	ALS2	alsin Rho guanine nucleotide exchange factor ALS2	57679	-0.650492	8.46927	-3.32181	0.00164232	0.0579844	-1.25086
211572_s_at	SLC23A2	solute carrier family 23 member 2	9962	-1.15307	8.09119	-3.32144	0.0016441	0.0579844	-1.25182
244174_at	ERICH2-DT	ERICH2 divergent transcript	101926913	-0.667762	4.82618	-3.31944	0.00165382	0.0579844	-1.25703
222034_at	RACK1	receptor for activated C kinase 1	10399	-0.636969	8.26113	-3.31941	0.00165399	0.0579844	-1.25711
223207_x_at	PHPT1	phosphohistidine phosphatase 1	29085	-0.424425	12.2228	-3.31613	0.00167006	0.0582535	-1.26566
1552257_a_at	TTLL12	tubulin tyrosine ligase like 12	23170	-0.652991	10.1237	-3.31413	0.00167991	0.0584992	-1.27085
218940_at	VCPKMT	valosin containing protein lysine methyltransferase	79609	-0.838026	8.11669	-3.31259	0.00168758	0.0585345	-1.27487
207543_s_at	P4HA1	prolyl 4-hydroxylase subunit alpha 1	5033	-0.66067	10.2371	-3.30752	0.00171293	0.0589588	-1.28804
201149_s_at	TIMP3	TIMP metallopeptidase inhibitor 3	7078	-1.46235	9.7892	-3.30143	0.00174394	0.0597466	-1.30388
209572_s_at	EED	embryonic ectoderm development	8726	-0.747499	8.70879	-3.30125	0.00174485	0.0597466	-1.30434
232098_at	DST	dystonin	667	-0.990918	8.81407	-3.30072	0.00174753	0.0597466	-1.3057
65884_at	MAN1B1	mannosidase alpha class 1B member 1	11253	-0.638007	8.3791	-3.29957	0.00175345	0.0597609	-1.30868
1570588_at	MPRIP-AS1	MPRIP antisense RNA 1	100874529	-0.587939	6.57185	-3.29663	0.00176869	0.0600868	-1.31632
205780_at	BIK	BCL2 interacting killer	638	-1.12022	7.53557	-3.29661	0.00176879	0.0600868	-1.31637
218258_at	POLR1D	RNA polymerase I and III subunit D	51082	-0.69054	11.0608	-3.29481	0.00177817	0.0602093	-1.32104
203522_at	CCS	copper chaperone for superoxide dismutase	9973	-0.397514	9.18273	-3.2904	0.00180133	0.0606973	-1.33246
239232_at	MSI2	musashi RNA binding protein 2	124540	-0.847927	7.15995	-3.28795	0.00181436	0.0608409	-1.33882
219825_at	CYP26B1	cytochrome P450 family 26 subfamily B member 1	56603	-1.3539	6.68001	-3.28531	0.00182843	0.0612142	-1.34564
226832_at	RNF168	ring finger protein 168	165918	-0.531678	9.09608	-3.28302	0.00184077	0.0614581	-1.35158
225570_at	SLC41A1	solute carrier family 41 member 1	254428	-0.759907	9.92933	-3.28286	0.00184162	0.0614581	-1.35198
204173_at	MYL6B	myosin light chain 6B	140465	-0.715587	9.63381	-3.28157	0.00184861	0.0614945	-1.35533
212915_at	PDZRN3	PDZ domain containing ring finger 3	23024	-1.76665	8.00209	-3.27881	0.00186362	0.0617691	-1.36246
228994_at	CCDC24	coiled-coil domain containing 24	149473	-0.382149	7.3823	-3.27632	0.00187724	0.0620501	-1.36888
209044_x_at	SF3B4	splicing factor 3b subunit 4	10262	-0.484242	10.1003	-3.27505	0.00188425	0.0621588	-1.37217
229272_at	FNBP4	formin binding protein 4	23360	-0.721478	7.77659	-3.27412	0.00188941	0.0621588	-1.37458
203155_at	SETDB1	SET domain bifurcated histone lysine methyltransferase 1	9869	-0.501364	8.96586	-3.27172	0.00190271	0.0623967	-1.38077
203035_s_at	PIAS3	protein inhibitor of activated STAT 3	10401	-0.403089	8.30015	-3.27032	0.00191055	0.0625555	-1.3844
242549_at	PRKD3	protein kinase D3	23683	-1.20133	6.5371	-3.26649	0.00193206	0.0629367	-1.39427
211711_s_at	PTEN	phosphatase and tensin homolog	5728	-0.781685	8.30791	-3.2661	0.00193428	0.0629367	-1.39528
206067_s_at	WT1	WT1 transcription factor	7490	-0.719256	5.38306	-3.26354	0.00194876	0.0631169	-1.40186
213459_at	RPL37A	ribosomal protein L37a	6168	-0.912412	7.72181	-3.26352	0.00194891	0.0631169	-1.40193
204569_at	CILK1	ciliogenesis associated kinase 1	22858	-0.978125	7.8572	-3.25924	0.00197343	0.0637127	-1.41295
208072_s_at	DGKD	diacylglycerol kinase delta	8527	-0.47249	8.76325	-3.25737	0.00198423	0.0638177	-1.41776
225160_x_at	MDM2	MDM2 proto-oncogene	4193	-0.769982	9.49375	-3.25559	0.00199458	0.0638177	-1.42235
209339_at	SIAH2	siah E3 ubiquitin protein ligase 2	6478	-0.732306	11.0787	-3.25528	0.00199635	0.0638177	-1.42313
203306_s_at	SLC35A1	solute carrier family 35 member A1	10559	-0.538989	10.5289	-3.25445	0.00200124	0.0638177	-1.42529
227449_at	EPHA4	EPH receptor A4	2043	-1.39832	6.17633	-3.25443	0.00200131	0.0638177	-1.42532
216452_at	TRPM3	transient receptor potential cation channel subfamily M member 3	80036	-0.802375	5.39443	-3.25035	0.00202527	0.064192	-1.43581
215834_x_at	SCARB1	scavenger receptor class B member 1	949	-1.06494	10.7882	-3.24696	0.00204543	0.0645365	-1.44454
212496_s_at	KDM4B	lysine demethylase 4B	23030	-0.824144	10.5472	-3.24565	0.00205323	0.0646845	-1.44789
244132_x_at	ZNF518A	zinc finger protein 518A	9849	-0.817457	8.37576	-3.24322	0.00206783	0.0650461	-1.45414
224763_at	RPL37	ribosomal protein L37	6167	-0.788455	8.7235	-3.23944	0.00209067	0.0654523	-1.46382
205549_at	PCP4	Purkinje cell protein 4	5121	-2.78625	10.3425	-3.23852	0.0020963	0.0654523	-1.46619
226965_at	DENND6A	DENN domain containing 6A	201627	-0.558057	10.0168	-3.23835	0.00209737	0.0654523	-1.46663
212556_at	SCRIB	scribble planar cell polarity protein	23513	-0.43573	8.79819	-3.23565	0.00211391	0.0656036	-1.47355
1555216_a_at	TBX2-AS1	TBX2 antisense RNA 1	103689912	-1.51817	6.76133	-3.23416	0.00212309	0.0656433	-1.47737
220274_at	IQCA1	IQ motif containing with AAA domain 1	79781	-0.772747	5.43716	-3.2334	0.0021278	0.0656433	-1.47932
202860_at	DENND4B	DENN domain containing 4B	9909	-0.508933	9.55418	-3.23073	0.00214438	0.0660569	-1.48616
220703_at	IDI2-AS1	IDI2 antisense RNA 1	55853	-0.607662	5.48557	-3.22941	0.0021526	0.0662124	-1.48953
230403_at	RFX3	regulatory factor X3	5991	-0.585992	6.92897	-3.22585	0.00217499	0.0664806	-1.49864
202963_at	RFX5	regulatory factor X5	5993	-0.56948	9.48582	-3.22549	0.00217728	0.0664806	-1.49957
212300_at	TXLNA	taxilin alpha	200081	-0.554001	8.9756	-3.21968	0.00221426	0.0675105	-1.5144
211913_s_at	MERTK	MER proto-oncogene, tyrosine kinase	10461	-1.24191	9.52144	-3.21567	0.00224022	0.0680355	-1.52466
221847_at	SMIM10L1	small integral membrane protein 10 like 1	100129361	-0.665216	11.1659	-3.2118	0.00226547	0.0683058	-1.53453
217887_s_at	EPS15	epidermal growth factor receptor pathway substrate 15	2060	-0.617418	10.3109	-3.21171	0.00226608	0.0683058	-1.53477
201245_s_at	OTUB1	OTU deubiquitinase, ubiquitin aldehyde binding 1	55611	-0.550447	9.77218	-3.21063	0.00227314	0.0683058	-1.5375
1557945_at	DYNLT2	dynein light chain Tctex-type 2	6991	-0.643839	6.16273	-3.20547	0.00230737	0.0690354	-1.55066
227533_at	RALGPS2	Ral GEF with PH domain and SH3 binding motif 2	55103	-1.00119	8.64801	-3.20498	0.00231069	0.0690354	-1.55192
236273_at	NBPF1	NBPF member 1	55672	-1.04204	8.88083	-3.2029	0.00232459	0.0692451	-1.5572
220581_at	CCDC170	coiled-coil domain containing 170	80129	-0.800153	7.03053	-3.20272	0.0023258	0.0692451	-1.55766
1559003_a_at	CCDC163	CCDC163 homolog	126661	-0.479963	6.17795	-3.20244	0.00232768	0.0692451	-1.55837
218961_s_at	PNKP	polynucleotide kinase 3'-phosphatase	11284	-0.61969	9.93811	-3.19921	0.00234954	0.0695843	-1.5666
214375_at	PPFIBP1	PPFIA binding protein 1	8496	-1.16379	6.73403	-3.19819	0.00235649	0.0695843	-1.56919
218531_at	TMEM134	transmembrane protein 134	80194	-0.499887	9.30051	-3.19744	0.00236164	0.0695843	-1.57111
218376_s_at	MICAL1	microtubule associated monooxygenase, calponin and LIM domain containing 1	64780	-0.973293	6.93472	-3.1973	0.00236258	0.0695843	-1.57147
203625_x_at	SKP2	S-phase kinase associated protein 2	6502	-0.916662	8.89471	-3.1965	0.00236806	0.0695843	-1.5735
204055_s_at	MIA2	MIA SH3 domain ER export factor 2	4253	-0.721396	5.86651	-3.1964	0.0023687	0.0695843	-1.57374
225996_at	LONRF2	LON peptidase N-terminal domain and ring finger 2	164832	-1.2504	10.5739	-3.19617	0.0023703	0.0695843	-1.57433
223284_at	NAT14	N-acetyltransferase 14 (putative)	57106	-0.717103	8.82011	-3.19603	0.00237125	0.0695843	-1.57469
207828_s_at	CENPF	centromere protein F	1063	-1.06188	8.48267	-3.19455	0.00238139	0.0695971	-1.57844
212680_x_at	PPP1R14B	protein phosphatase 1 regulatory inhibitor subunit 14B	26472	-0.558766	9.9626	-3.19361	0.00238788	0.0695971	-1.58084
235434_at	CCDC134	coiled-coil domain containing 134	79879	-1.08517	9.60095	-3.1935	0.00238864	0.0695971	-1.58111
214934_at	ATP9B	ATPase phospholipid transporting 9B (putative)	374868	-0.450574	8.0383	-3.19111	0.0024052	0.0695971	-1.58719
201247_at	SREBF2	sterol regulatory element binding transcription factor 2	6721	-0.592003	10.0313	-3.19057	0.00240898	0.0695971	-1.58857
212368_at	ZNF292	zinc finger protein 292	23036	-0.712071	9.95874	-3.19046	0.0024097	0.0695971	-1.58883
212801_at	CIT	citron rho-interacting serine/threonine kinase	11113	-1.07816	9.99018	-3.18733	0.00243156	0.0699377	-1.59678
220694_at	ASAP1-IT1	ASAP1 intronic transcript 1	29065	-0.521095	6.67764	-3.18587	0.00244182	0.0701359	-1.60048
226556_at	MAP3K13	mitogen-activated protein kinase kinase kinase 13	9175	-0.62243	9.55634	-3.18534	0.00244559	0.0701474	-1.60184
236270_at	NFATC4	nuclear factor of activated T cells 4	4776	-0.773919	7.28177	-3.18486	0.00244896	0.0701474	-1.60305
241954_at	FDFT1	farnesyl-diphosphate farnesyltransferase 1	2222	-1.37874	8.55967	-3.18217	0.00246808	0.0705012	-1.60989
201930_at	MCM6	minichromosome maintenance complex component 6	4175	-0.679888	9.79828	-3.18167	0.0024716	0.070505	-1.61114
219230_at	TMEM100	transmembrane protein 100	55273	-1.41774	6.48148	-3.18046	0.00248023	0.0705732	-1.61421
226569_s_at	CHTF18	chromosome transmission fidelity factor 18	63922	-0.514466	7.8484	-3.17387	0.00252777	0.0711327	-1.6309
229017_s_at	DSTYK	dual serine/threonine and tyrosine protein kinase	25778	-0.724743	8.06962	-3.17245	0.00253815	0.0712578	-1.6345
221188_s_at	CIDEB	cell death inducing DFFA like effector b	27141	-0.807618	9.74457	-3.1683	0.00256867	0.0717407	-1.64501
219201_s_at	TWSG1	twisted gastrulation BMP signaling modulator 1	57045	-1.16398	7.8712	-3.16648	0.00258216	0.0717407	-1.64961
51228_at	RBM12B	RNA binding motif protein 12B	389677	-0.476176	7.14452	-3.16557	0.00258886	0.0717407	-1.65189
208636_at	ACTN1	actinin alpha 1	87	-0.827339	10.3618	-3.16524	0.00259135	0.0717407	-1.65273
221569_at	AHI1	Abelson helper integration site 1	54806	-0.634716	9.2455	-3.16383	0.00260189	0.0717407	-1.6563
226129_at	FAM83H	family with sequence similarity 83 member H	286077	-0.792507	7.40095	-3.1621	0.00261483	0.0717407	-1.66066
219397_at	COQ10B	coenzyme Q10B	80219	-0.413689	10.7247	-3.16065	0.00262573	0.0718337	-1.66431
223501_at	TNFSF13B	TNF superfamily member 13b	10673	-1.86671	9.80066	-3.1603	0.00262836	0.0718337	-1.66519
206393_at	TNNI2	troponin I2, fast skeletal type	7136	-1.44896	6.82927	-3.16028	0.00262857	0.0718337	-1.66526
243648_at	ZBED6	zinc finger BED-type containing 6	100381270	-0.704857	7.01548	-3.15773	0.0026479	0.0718744	-1.6717
229638_at	IRX3	iroquois homeobox 3	79191	-1.02414	7.56638	-3.1567	0.00265569	0.0718744	-1.67428
202589_at	TYMS	thymidylate synthetase	7298	-1.14027	9.05489	-3.15599	0.00266112	0.0718744	-1.67607
218051_s_at	NT5DC2	5'-nucleotidase domain containing 2	64943	-1.03696	8.406	-3.15523	0.00266691	0.0719375	-1.67798
232843_s_at	DOCK8	dedicator of cytokinesis 8	81704	-0.928856	7.38688	-3.15456	0.00267206	0.0719594	-1.67968
202043_s_at	SMS	spermine synthase	6611	-0.747343	10.9828	-3.15268	0.00268656	0.0720334	-1.68443
220085_at	HELLS	helicase, lymphoid specific	3070	-1.18537	6.43314	-3.15249	0.00268802	0.0720334	-1.68491
229666_s_at	CSTF3	cleavage stimulation factor subunit 3	1479	-0.821182	7.32251	-3.15187	0.00269282	0.0720334	-1.68648
1557246_at	KIDINS220	kinase D interacting substrate 220	57498	-0.795899	7.97024	-3.1488	0.00271656	0.0724322	-1.69418
202971_s_at	DYRK2	dual specificity tyrosine phosphorylation regulated kinase 2	8445	-1.1112	7.64402	-3.14396	0.00275453	0.0731637	-1.70637
224807_at	GRAMD1A	GRAM domain containing 1A	57655	-0.5774	9.03793	-3.1413	0.0027756	0.0734423	-1.71307
203089_s_at	HTRA2	HtrA serine peptidase 2	27429	-0.528135	9.72249	-3.14002	0.00278583	0.07354	-1.7163
229290_at	DAPL1	death associated protein like 1	92196	-1.93915	8.00315	-3.13995	0.00278636	0.07354	-1.71646
229551_x_at	ZNF367	zinc finger protein 367	195828	-1.25282	6.428	-3.13782	0.0028034	0.0738464	-1.72182
204076_at	ENTPD4	ectonucleoside triphosphate diphosphohydrolase 4	9583	-0.47472	9.53894	-3.13758	0.00280532	0.0738464	-1.72242
208886_at	H1-0	H1.0 linker histone	3005	-0.846284	10.0743	-3.13717	0.0028086	0.0738464	-1.72344
228850_s_at	SLIT2	slit guidance ligand 2	9353	-1.61288	8.38441	-3.13632	0.00281542	0.0739323	-1.72557
228049_x_at	SNHG19	small nucleolar RNA host gene 19	100507303	-0.792082	10.1997	-3.13044	0.00286319	0.0749019	-1.74034
228550_at	RTN4R	reticulon 4 receptor	65078	-0.894842	7.37544	-3.13001	0.00286673	0.0749019	-1.74142
225802_at	TOP1MT	DNA topoisomerase I mitochondrial	116447	-0.6354	8.5287	-3.12795	0.00288367	0.0751558	-1.74659
208113_x_at	PABPC3	poly(A) binding protein cytoplasmic 3	5042	-0.283992	12.7916	-3.12608	0.00289907	0.0752724	-1.75127
204853_at	ORC2	origin recognition complex subunit 2	4999	-0.779394	8.14541	-3.12575	0.00290181	0.0752724	-1.7521
226348_at	FUT11	fucosyltransferase 11	170384	-0.712536	9.00878	-3.12478	0.00290983	0.0752724	-1.75452
202528_at	GALE	UDP-galactose-4-epimerase	2582	-0.835358	8.14913	-3.11845	0.00296293	0.0761998	-1.77038
228931_at	COQ4	coenzyme Q4	51117	-0.655455	8.42112	-3.11764	0.00296971	0.0761998	-1.77239
227863_at	IFITM10	interferon induced transmembrane protein 10	402778	-1.32644	8.73811	-3.11761	0.00296999	0.0761998	-1.77247
226437_at	YIF1B	Yip1 interacting factor homolog B, membrane trafficking protein	90522	-0.535855	8.96964	-3.11746	0.00297129	0.0761998	-1.77286
213933_at	PTGER3	prostaglandin E receptor 3	5733	-1.15549	5.96937	-3.11651	0.00297937	0.0763129	-1.77524
215004_s_at	SUGP1	SURP and G-patch domain containing 1	57794	-0.591433	8.48588	-3.11553	0.00298768	0.0764318	-1.77768
221274_s_at	LMAN2L	lectin, mannose binding 2 like	81562	-0.310909	9.54283	-3.11204	0.0030175	0.0771	-1.78639
218028_at	ELOVL1	ELOVL fatty acid elongase 1	64834	-0.820054	9.65387	-3.11015	0.00303385	0.0774226	-1.79113
203298_s_at	JARID2	jumonji and AT-rich interaction domain containing 2	3720	-0.715643	8.85375	-3.10948	0.00303963	0.0774751	-1.7928
219451_at	MSRB2	methionine sulfoxide reductase B2	22921	-0.6629	8.06382	-3.10825	0.0030503	0.0774786	-1.79587
202808_at	WBP1L	WW domain binding protein 1 like	54838	-0.538692	10.9499	-3.10775	0.00305465	0.0774786	-1.79712
212017_at	FAM168B	family with sequence similarity 168 member B	130074	-0.437002	10.377	-3.10538	0.00307526	0.0777174	-1.80302
233106_at	FRMD6-AS1	FRMD6 antisense RNA 1	145438	-0.391557	5.38402	-3.10392	0.0030881	0.0778259	-1.80667
200787_s_at	PEA15	proliferation and apoptosis adaptor protein 15	8682	-0.683698	10.1399	-3.10362	0.00309076	0.0778259	-1.80743
229269_x_at	SSBP4	single stranded DNA binding protein 4	170463	-0.676586	9.35236	-3.10225	0.00310278	0.0779399	-1.81083
216237_s_at	MCM5	minichromosome maintenance complex component 5	4174	-1.07208	8.44928	-3.09983	0.00312421	0.0781954	-1.81686
226121_at	DHRS13	dehydrogenase/reductase 13	147015	-0.663072	8.93209	-3.0964	0.00315485	0.0785948	-1.82542
209340_at	UAP1	UDP-N-acetylglucosamine pyrophosphorylase 1	6675	-0.66742	10.4583	-3.09586	0.00315971	0.0786114	-1.82677
228573_at	ANTXR2	ANTXR cell adhesion molecule 2	118429	-0.764968	8.27473	-3.09399	0.00317649	0.0788195	-1.83141
226641_at	ANKRD44	ankyrin repeat domain 44	91526	-0.99454	7.93739	-3.09353	0.00318062	0.0788195	-1.83255
232652_x_at	SCAND1	SCAN domain containing 1	51282	-0.357864	10.3076	-3.09325	0.00318321	0.0788195	-1.83326
229325_at	ZZZ3	zinc finger ZZ-type containing 3	26009	-0.473326	8.49318	-3.09237	0.00319111	0.0789182	-1.83543
240557_at	TSC22D2	TSC22 domain family member 2	9819	-0.620492	6.99002	-3.09182	0.00319616	0.0789182	-1.83682
218117_at	RBX1	ring-box 1	9978	-0.49441	11.2159	-3.09155	0.00319857	0.0789182	-1.83748
37965_at	PARVB	parvin beta	29780	-0.744999	7.8633	-3.08984	0.00321414	0.0792085	-1.84173
209694_at	PTS	6-pyruvoyltetrahydropterin synthase	5805	-0.800314	11.4212	-3.08799	0.00323107	0.0794378	-1.84634
209883_at	COLGALT2	collagen beta(1-O)galactosyltransferase 2	23127	-1.25544	7.38699	-3.08653	0.00324442	0.0796546	-1.84995
226622_at	MUC20	mucin 20, cell surface associated	200958	-0.523703	6.55839	-3.08558	0.00325323	0.0797003	-1.85233
233249_at	LINC01798	long intergenic non-protein coding RNA 1798	100507073	-1.41119	8.65923	-3.08477	0.00326068	0.0797889	-1.85433
205002_at	AHDC1	AT-hook DNA binding motif containing 1	27245	-0.674772	8.41936	-3.08289	0.00327812	0.0801215	-1.859
228098_s_at	MYLIP	myosin regulatory light chain interacting protein	29116	-1.18646	8.79566	-3.08072	0.00329834	0.0804755	-1.86439
218901_at	PLSCR4	phospholipid scramblase 4	57088	-1.08298	10.3331	-3.08051	0.00330033	0.0804755	-1.86492
228284_at	TLE1	TLE family member 1, transcriptional corepressor	7088	-1.00054	9.70038	-3.07526	0.00334973	0.0812993	-1.87793
200771_at	LAMC1	laminin subunit gamma 1	3915	-0.487775	10.0783	-3.07204	0.00338036	0.0818417	-1.8859
212026_s_at	EXOC7	exocyst complex component 7	23265	-0.498372	8.02256	-3.07168	0.00338387	0.0818417	-1.88681
202779_s_at	UBE2S	ubiquitin conjugating enzyme E2 S	27338	-0.891681	9.82907	-3.06913	0.00340832	0.0821741	-1.89312
226300_at	MED19	mediator complex subunit 19	219541	-0.611987	8.99438	-3.06873	0.00341217	0.0821741	-1.8941
227929_at	LIN7A	lin-7 homolog A, crumbs cell polarity complex component	8825	-1.38707	6.2899	-3.06785	0.00342066	0.0822538	-1.89628
226969_at	MTR	5-methyltetrahydrofolate-homocysteine methyltransferase	4548	-0.591411	8.82954	-3.06636	0.00343512	0.0825062	-1.89997
224882_at	ACSS1	acyl-CoA synthetase short chain family member 1	84532	-0.838427	9.55299	-3.06324	0.00346556	0.0831414	-1.90769
228077_at	MRI1	methylthioribose-1-phosphate isomerase 1	84245	-0.453957	9.98483	-3.06218	0.00347596	0.0831513	-1.91032
200896_x_at	HDGF	heparin binding growth factor	3068	-0.362159	11.0997	-3.0612	0.00348558	0.0831513	-1.91274
242438_at	ASXL1	ASXL transcriptional regulator 1	171023	-0.840718	8.27563	-3.05889	0.00350837	0.0834156	-1.91844
205434_s_at	AAK1	AP2 associated kinase 1	22848	-0.446552	10.3486	-3.05801	0.00351704	0.0834156	-1.9206
228455_at	RBM15	RNA binding motif protein 15	64783	-1.03348	6.87633	-3.05721	0.00352506	0.0834157	-1.92259
209781_s_at	KHDRBS3	KH RNA binding domain containing, signal transduction associated 3	10656	-0.910021	8.3823	-3.05619	0.00353513	0.0835591	-1.92509
1556053_at	DNAJC7	DnaJ heat shock protein family (Hsp40) member C7	7266	-0.710495	7.5583	-3.0529	0.00356817	0.0839589	-1.93323
205340_at	ZBTB24	zinc finger and BTB domain containing 24	9841	-0.50135	8.11375	-3.05203	0.00357685	0.084068	-1.93535
230974_at	DDX19B	DEAD-box helicase 19B	11269	-0.394293	7.13445	-3.05118	0.00358547	0.0841732	-1.93746
239930_at	GALNT2	polypeptide N-acetylgalactosaminyltransferase 2	2590	-0.889154	7.28723	-3.05044	0.00359295	0.0841732	-1.93928
208609_s_at	TNXB	tenascin XB	7148	-1.40698	10.6431	-3.04898	0.00360777	0.0841954	-1.94289
226301_at	SLC18B1	solute carrier family 18 member B1	116843	-0.772618	9.04141	-3.04892	0.00360834	0.0841954	-1.94302
215157_x_at	PABPC1	poly(A) binding protein cytoplasmic 1	26986	-0.270112	13.4162	-3.04831	0.00361455	0.0841954	-1.94453
1557718_at	PPP2R5C	protein phosphatase 2 regulatory subunit B'gamma	5527	-0.587181	6.70602	-3.04816	0.0036161	0.0841954	-1.9449
236620_at	RIF1	replication timing regulatory factor 1	55183	-0.775681	7.97555	-3.04784	0.00361931	0.0841954	-1.94568
212131_at	LSM14A	LSM14A mRNA processing body assembly factor	26065	-0.623165	10.465	-3.04683	0.00362966	0.084263	-1.94818
218909_at	RPS6KC1	ribosomal protein S6 kinase C1	26750	-0.686292	9.00637	-3.0453	0.00364539	0.084534	-1.95196
222569_at	UGGT1	UDP-glucose glycoprotein glucosyltransferase 1	56886	-0.691094	7.51094	-3.0443	0.00365557	0.084668	-1.9544
213402_at	ZNF787	zinc finger protein 787	126208	-0.353417	8.77636	-3.04394	0.0036593	0.084668	-1.95529
201164_s_at	PUM1	pumilio RNA binding family member 1	9698	-0.431476	10.8689	-3.04045	0.0036954	0.0853136	-1.96388
219670_at	BEND5	BEN domain containing 5	79656	-0.856025	7.772	-3.03873	0.0037133	0.0855083	-1.9681
1555886_at	PDSS2	decaprenyl diphosphate synthase subunit 2	57107	-0.622671	7.63522	-3.03798	0.00372119	0.0855299	-1.96996
209651_at	TGFB1I1	transforming growth factor beta 1 induced transcript 1	7041	-1.18392	8.83632	-3.03735	0.00372781	0.085569	-1.97151
226739_at	RNF169	ring finger protein 169	254225	-0.699482	8.42053	-3.03586	0.00374345	0.0855693	-1.97517
205593_s_at	PDE9A	phosphodiesterase 9A	5152	-0.661965	8.50416	-3.03445	0.00375827	0.0857199	-1.97863
203282_at	GBE1	1,4-alpha-glucan branching enzyme 1	2632	-0.663585	11.6473	-3.03291	0.00377458	0.0859112	-1.98241
218154_at	GSDMD	gasdermin D	79792	-0.528385	8.73385	-3.03288	0.00377491	0.0859112	-1.98249
1566079_at	RPS16P5	ribosomal protein S16 pseudogene 5	647190	-0.904406	8.89893	-3.03174	0.00378698	0.0859199	-1.98528
205666_at	FMO1	flavin containing dimethylaniline monoxygenase 1	2326	-1.30891	6.88988	-3.03168	0.00378767	0.0859199	-1.98544
229756_at	ID2-AS1	ID2 antisense RNA 1	100506299	-0.563522	6.4662	-3.02488	0.0038606	0.0871641	-2.00211
211929_at	HNRNPA3	heterogeneous nuclear ribonucleoprotein A3	220988	-0.535389	10.3365	-3.02445	0.0038653	0.0871641	-2.00317
238686_at	FBXO3	F-box protein 3	26273	-0.550802	7.94973	-3.02327	0.00387806	0.0871641	-2.00605
38340_at	HIP1R	huntingtin interacting protein 1 related	9026	-0.565317	9.51912	-3.02296	0.00388142	0.0871641	-2.00681
225181_at	ARID1B	AT-rich interaction domain 1B	57492	-0.641644	8.92474	-3.02096	0.00390329	0.0871641	-2.01172
200082_s_at	RPS7	ribosomal protein S7	6201	-0.386993	13.2945	-3.0209	0.00390396	0.0871641	-2.01187
237853_x_at	KRTAP10-12	keratin associated protein 10-12	386685	-0.184966	4.83352	-3.02008	0.00391291	0.0871641	-2.01387
1568865_at	FNTB	farnesyltransferase, CAAX box, beta	2342	-0.865859	6.27914	-3.01747	0.00394167	0.0874136	-2.02027
202754_at	R3HDM1	R3H domain containing 1	23518	-0.512424	9.84702	-3.0131	0.00399022	0.0880376	-2.03096
202763_at	CASP3	caspase 3	836	-0.683575	8.33729	-3.01303	0.00399095	0.0880376	-2.03112
202022_at	ALDOC	aldolase, fructose-bisphosphate C	230	-1.29197	10.0354	-3.01196	0.00400289	0.0881143	-2.03373
228184_at	DISP1	dispatched RND transporter family member 1	84976	-1.05008	8.41676	-3.01092	0.00401456	0.088278	-2.03628
1559097_at	LINC01550	long intergenic non-protein coding RNA 1550	388011	-0.380215	5.55971	-3.00983	0.00402681	0.0883475	-2.03894
220975_s_at	C1QTNF1	C1q and TNF related 1	114897	-0.65294	8.88694	-3.00953	0.00403018	0.0883475	-2.03967
222646_s_at	ERO1A	endoplasmic reticulum oxidoreductase 1 alpha	30001	-0.900842	8.22725	-3.00878	0.00403869	0.0883475	-2.04151
226730_s_at	USP37	ubiquitin specific peptidase 37	57695	-0.750508	7.19972	-3.00847	0.00404221	0.0883475	-2.04227
207030_s_at	CSRP2	cysteine and glycine rich protein 2	1466	-1.06211	8.3247	-3.00691	0.00405984	0.0886186	-2.04607
210911_at	ID2B	inhibitor of DNA binding 2B (pseudogene)	84099	-0.176273	4.49549	-3.00629	0.0040669	0.0886796	-2.04759
226303_at	PGM5	phosphoglucomutase 5	5239	-1.30337	10.4854	-3.00064	0.00413154	0.08962	-2.06136
213310_at	AGO2	argonaute RISC catalytic component 2	27161	-0.840105	7.21032	-2.99975	0.00414185	0.0897501	-2.06353
219998_at	LGALSL	galectin like	29094	-0.638716	8.32581	-2.99716	0.00417193	0.0901811	-2.06985
205466_s_at	HS3ST1	heparan sulfate-glucosamine 3-sulfotransferase 1	9957	-1.24397	6.47776	-2.99624	0.00418266	0.0901811	-2.07209
224851_at	CDK6	cyclin dependent kinase 6	1021	-1.14242	9.55781	-2.99618	0.00418339	0.0901811	-2.07225
228656_at	PROX1	prospero homeobox 1	5629	-0.978417	8.86709	-2.99308	0.00421966	0.0904708	-2.07978
223168_at	RHOU	ras homolog family member U	58480	-1.12345	11.0739	-2.99192	0.00423331	0.0904708	-2.0826
209750_at	NR1D2	nuclear receptor subfamily 1 group D member 2	9975	-0.832091	9.00771	-2.98952	0.0042618	0.0908538	-2.08845
221600_s_at	AAMDC	adipogenesis associated Mth938 domain containing	28971	-0.609197	10.0829	-2.98945	0.00426259	0.0908538	-2.08861
228933_at	NHS	NHS actin remodeling regulator	4810	-0.98809	8.24577	-2.98797	0.00428022	0.0910434	-2.09221
1552777_a_at	RAET1E	retinoic acid early transcript 1E	135250	-0.399442	5.33523	-2.98797	0.00428023	0.0910434	-2.09222
229941_at	FAM166B	family with sequence similarity 166 member B	730112	-1.60877	10.6869	-2.98666	0.00429589	0.0912832	-2.0954
203431_s_at	ARHGAP32	Rho GTPase activating protein 32	9743	-0.660019	8.85662	-2.98512	0.00431435	0.0913958	-2.09915
223642_at	ZIC2	Zic family member 2	7546	-0.93123	5.3445	-2.98317	0.00433782	0.0915206	-2.10388
213725_x_at	XYLT1	xylosyltransferase 1	64131	-1.12152	9.72482	-2.98116	0.00436211	0.0915283	-2.10875
230090_at	GDNF	glial cell derived neurotrophic factor	2668	-0.51079	6.22919	-2.98024	0.00437333	0.0915283	-2.11099
226166_x_at	STK36	serine/threonine kinase 36	27148	-0.545347	9.11802	-2.97958	0.00438136	0.0915283	-2.11259
201952_at	ALCAM	activated leukocyte cell adhesion molecule	214	-1.26911	9.4936	-2.97935	0.00438416	0.0915283	-2.11315
228273_at	PRR11	proline rich 11	55771	-1.17232	7.04636	-2.97925	0.00438533	0.0915283	-2.11338
1556364_at	ADAMTS9-AS2	ADAMTS9 antisense RNA 2	100507098	-1.18581	7.86989	-2.97836	0.00439622	0.0915283	-2.11554
230807_at	ODAD3	outer dynein arm docking complex subunit 3	115948	-1.34681	9.235	-2.97832	0.00439674	0.0915283	-2.11565
222133_s_at	PHF20L1	PHD finger protein 20 like 1	51105	-0.587187	8.39739	-2.97806	0.00439983	0.0915283	-2.11626
230375_at	PNISR	PNN interacting serine and arginine rich protein	25957	-0.718534	6.24903	-2.97738	0.00440816	0.0915283	-2.11791
1566851_at	TRIM42	tripartite motif containing 42	287015	-0.150071	4.99581	-2.97644	0.0044197	0.0916691	-2.12019
200858_s_at	RPS8	ribosomal protein S8	6202	-0.306446	12.8008	-2.97499	0.00443758	0.0917887	-2.12371
217885_at	IPO9	importin 9	55705	-0.619744	9.95534	-2.9749	0.00443865	0.0917887	-2.12392
209814_at	ZNF330	zinc finger protein 330	27309	-0.520685	9.55698	-2.97476	0.00444045	0.0917887	-2.12428
218726_at	HJURP	Holliday junction recognition protein	55355	-0.763592	6.40574	-2.97454	0.0044431	0.0917887	-2.12479
36936_at	GFUS	GDP-L-fucose synthase	7264	-0.530132	9.76219	-2.97246	0.00446888	0.0920015	-2.12984
215898_at	TTLL5	tubulin tyrosine ligase like 5	23093	-0.617523	5.53193	-2.97112	0.00448555	0.0921174	-2.13309
214951_at	SLC26A10P	solute carrier family 26 member 10, pseudogene	65012	-0.569145	6.63741	-2.97036	0.00449503	0.0922093	-2.13493
1569652_at	MLLT3	MLLT3 super elongation complex subunit	4300	-1.11459	6.9695	-2.96946	0.00450621	0.0922221	-2.13709
243951_at	ABCB1	ATP binding cassette subfamily B member 1	5243	-1.12552	8.46618	-2.96929	0.00450836	0.0922221	-2.13751
202365_at	UNC119B	unc-119 lipid binding chaperone B	84747	-0.563268	10.5321	-2.96641	0.00454456	0.0924861	-2.14448
221640_s_at	PIDD1	p53-induced death domain protein 1	55367	-0.391583	6.80023	-2.96624	0.00454666	0.0924861	-2.14488
212553_at	RPRD2	regulation of nuclear pre-mRNA domain containing 2	23248	-0.386106	10.5591	-2.96581	0.00455213	0.0924861	-2.14593
219762_s_at	RPL36	ribosomal protein L36	25873	-0.379563	13.0006	-2.96579	0.00455235	0.0924861	-2.14598
215009_s_at	THAP9-AS1	THAP9 antisense RNA 1	100499177	-0.589132	8.7753	-2.96534	0.0045581	0.0925126	-2.14708
223071_at	IER3IP1	immediate early response 3 interacting protein 1	51124	-0.397635	10.9144	-2.96341	0.00458258	0.0927383	-2.15174
210034_s_at	RPL5	ribosomal protein L5	6125	-0.584321	5.96521	-2.96165	0.00460495	0.0931004	-2.15599
213823_at	HOXA11	homeobox A11	3207	-0.8489	7.04163	-2.96048	0.00461989	0.0932215	-2.15881
1553292_s_at	RSKR	ribosomal protein S6 kinase related	124923	-0.723579	5.91564	-2.95214	0.00472791	0.094818	-2.17895
218996_at	TFPT	TCF3 fusion partner	29844	-0.427021	8.50963	-2.95145	0.00473688	0.094847	-2.1806
242512_at	MYO9A	myosin IXA	4649	-0.614702	5.86795	-2.95015	0.00475401	0.0949346	-2.18375
226307_at	CRTC2	CREB regulated transcription coactivator 2	200186	-0.353769	8.92041	-2.95008	0.00475494	0.0949346	-2.18392
204106_at	TESK1	testis associated actin remodelling kinase 1	7016	-0.601989	9.80752	-2.94903	0.00476874	0.0950759	-2.18644
235132_at	NIFK-AS1	NIFK antisense RNA 1	254128	-0.490202	7.8837	-2.94884	0.00477114	0.0950759	-2.18688
223849_s_at	MOV10	Mov10 RISC complex RNA helicase	4343	-0.615945	8.08376	-2.94829	0.00477848	0.0951292	-2.18822
236555_at	TRAF3IP2-AS1	TRAF3IP2 antisense RNA 1	643749	-0.288762	5.91051	-2.94535	0.00481746	0.0956328	-2.19529
200619_at	SF3B2	splicing factor 3b subunit 2	10992	-0.354492	10.2783	-2.94379	0.00483832	0.0958955	-2.19906
202729_s_at	LTBP1	latent transforming growth factor beta binding protein 1	4052	-1.14873	8.41991	-2.94178	0.0048652	0.0961303	-2.20388
1557570_a_at	LINC01305	long intergenic non-protein coding RNA 1305	285084	-0.829301	4.76019	-2.94083	0.00487796	0.0961303	-2.20616
243435_at	KCNQ1OT1	KCNQ1 opposite strand/antisense transcript 1	10984	-0.642139	7.84212	-2.94072	0.00487946	0.0961303	-2.20643
1555907_at	AGAP2-AS1	AGAP2 antisense RNA 1	100130776	-0.884449	6.89212	-2.9352	0.00495439	0.0972386	-2.2197
226470_at	GGT7	gamma-glutamyltransferase 7	2686	-0.540735	8.80217	-2.93469	0.00496132	0.097283	-2.22091
232397_at	HECW2-AS1	HECW2 antisense RNA 1	101927482	-0.694493	4.62915	-2.93359	0.00497633	0.0974855	-2.22354
228598_at	DPP10	dipeptidyl peptidase like 10	57628	-1.63431	8.31918	-2.93189	0.00499983	0.0975218	-2.22765
209909_s_at	TGFB2	transforming growth factor beta 2	7042	-0.848202	4.65733	-2.93178	0.00500123	0.0975218	-2.22789
244811_at	PHIP	pleckstrin homology domain interacting protein	55023	-0.912319	6.51014	-2.93095	0.00501273	0.0975218	-2.22989
242348_at	TAFA4	TAFA chemokine like family member 4	151647	-2.02965	7.96093	-2.92955	0.00503216	0.0975218	-2.23325
225004_at	TMEM101	transmembrane protein 101	84336	-0.388789	8.05697	-2.92936	0.00503478	0.0975218	-2.23371
208016_s_at	AGTR1	angiotensin II receptor type 1	185	-1.48631	9.22665	-2.92889	0.00504126	0.0975218	-2.23483
243953_at	FADS2	fatty acid desaturase 2	9415	-0.377214	6.66572	-2.92786	0.00505554	0.0976592	-2.23729
220133_at	ODAM	odontogenic, ameloblast associated	54959	-1.26502	5.23646	-2.92627	0.00507772	0.0978477	-2.2411
209657_s_at	HSF2	heat shock transcription factor 2	3298	-0.706004	8.55084	-2.92283	0.00512603	0.0985636	-2.24934
218477_at	TMEM14A	transmembrane protein 14A	28978	-0.629533	10.7309	-2.92217	0.00513543	0.0985781	-2.25093
213861_s_at	EEF1AKMT3	EEF1A lysine methyltransferase 3	25895	-0.662816	8.20511	-2.91939	0.00517488	0.0990457	-2.25759
213686_at	VPS13A	vacuolar protein sorting 13 homolog A	23230	-0.974471	8.20217	-2.91694	0.00520976	0.0992148	-2.26343
232902_s_at	RARS2	arginyl-tRNA synthetase 2, mitochondrial	57038	-0.882415	8.56327	-2.91676	0.0052123	0.0992148	-2.26386
217434_at	MC2R	melanocortin 2 receptor	4158	-1.77358	7.43357	-2.91558	0.00522932	0.0994479	-2.26669
227088_at	PDE5A	phosphodiesterase 5A	8654	-1.05157	7.56117	-2.91452	0.00524449	0.0995604	-2.26921
36612_at	FAM168A	family with sequence similarity 168 member A	23201	-0.442943	6.59198	-2.91202	0.00528074	0.099837	-2.2752
