# Supplementary figures and images for: Targeting Oncogenic Wnt/β-Catenin Signaling in Adrenocortical Carcinoma Disrupts ECM Expression and Impairs Tumor Growth
Source: MDPI journal article supplement (doi:10.3390/cancers15143559), 2023-07-10

A.

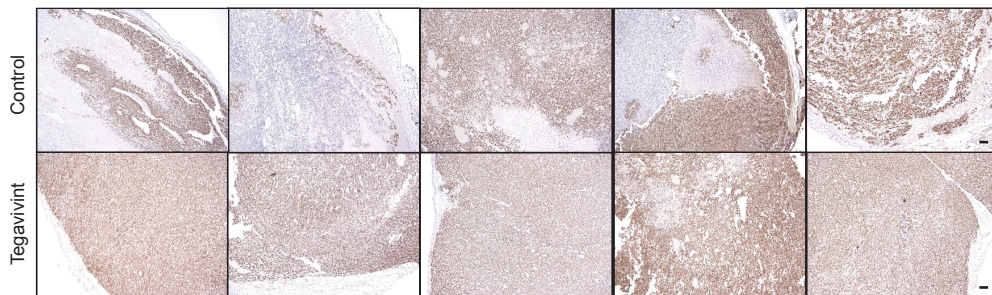

B.

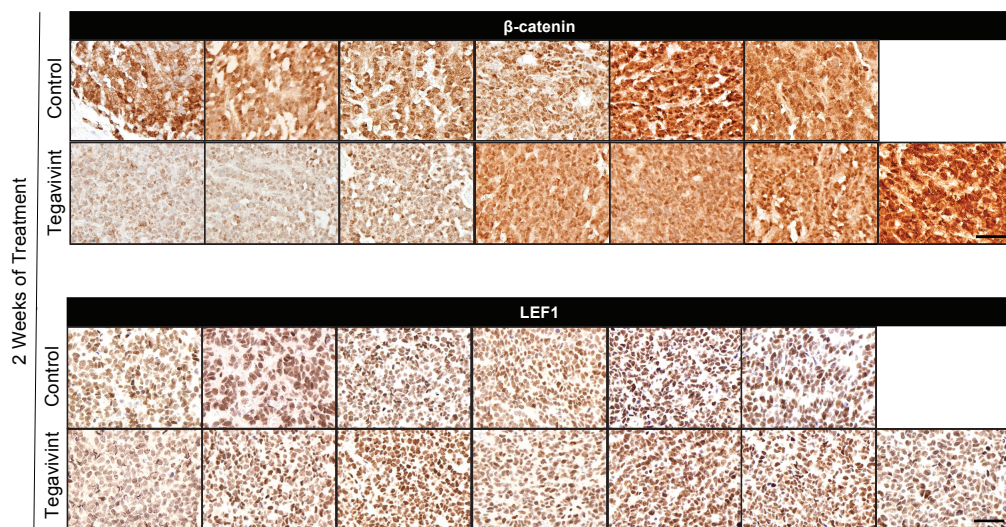

Supplement: s1 [file s1]

A.

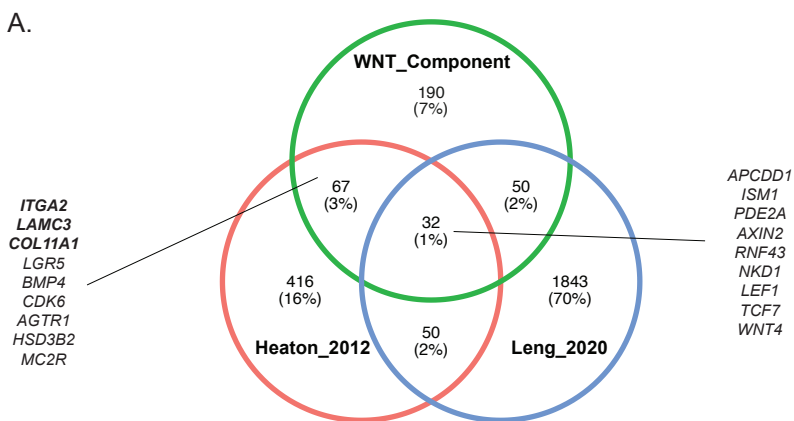

B.

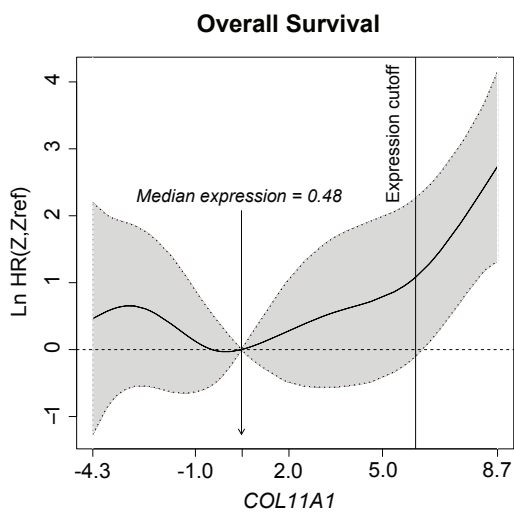

C.

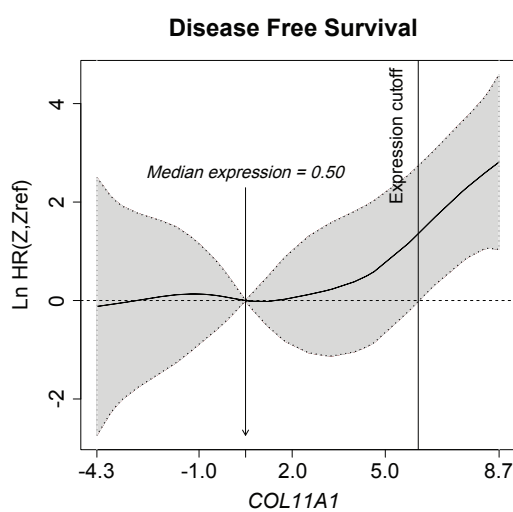

D.

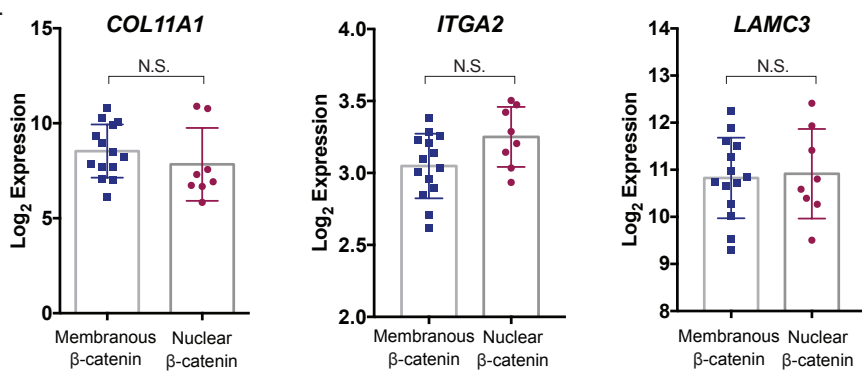

E.

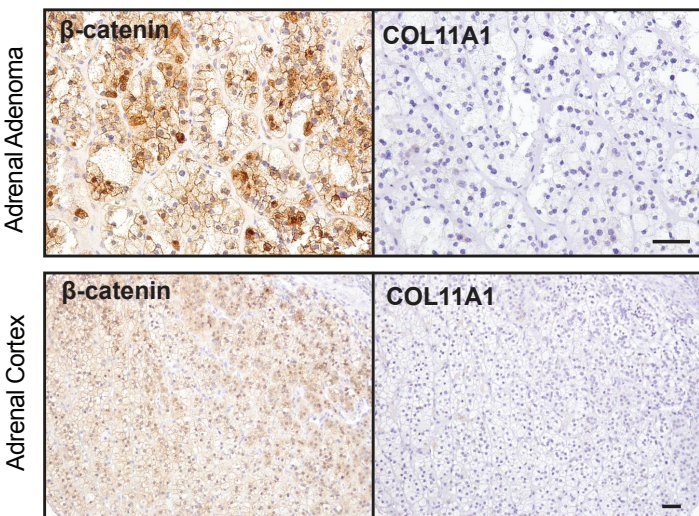

F.

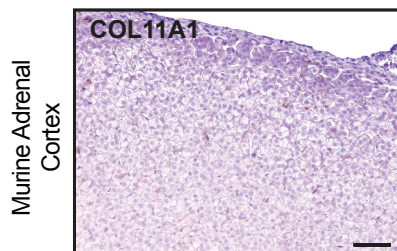

Supplement: s1 [file s1]

NCI-H295R

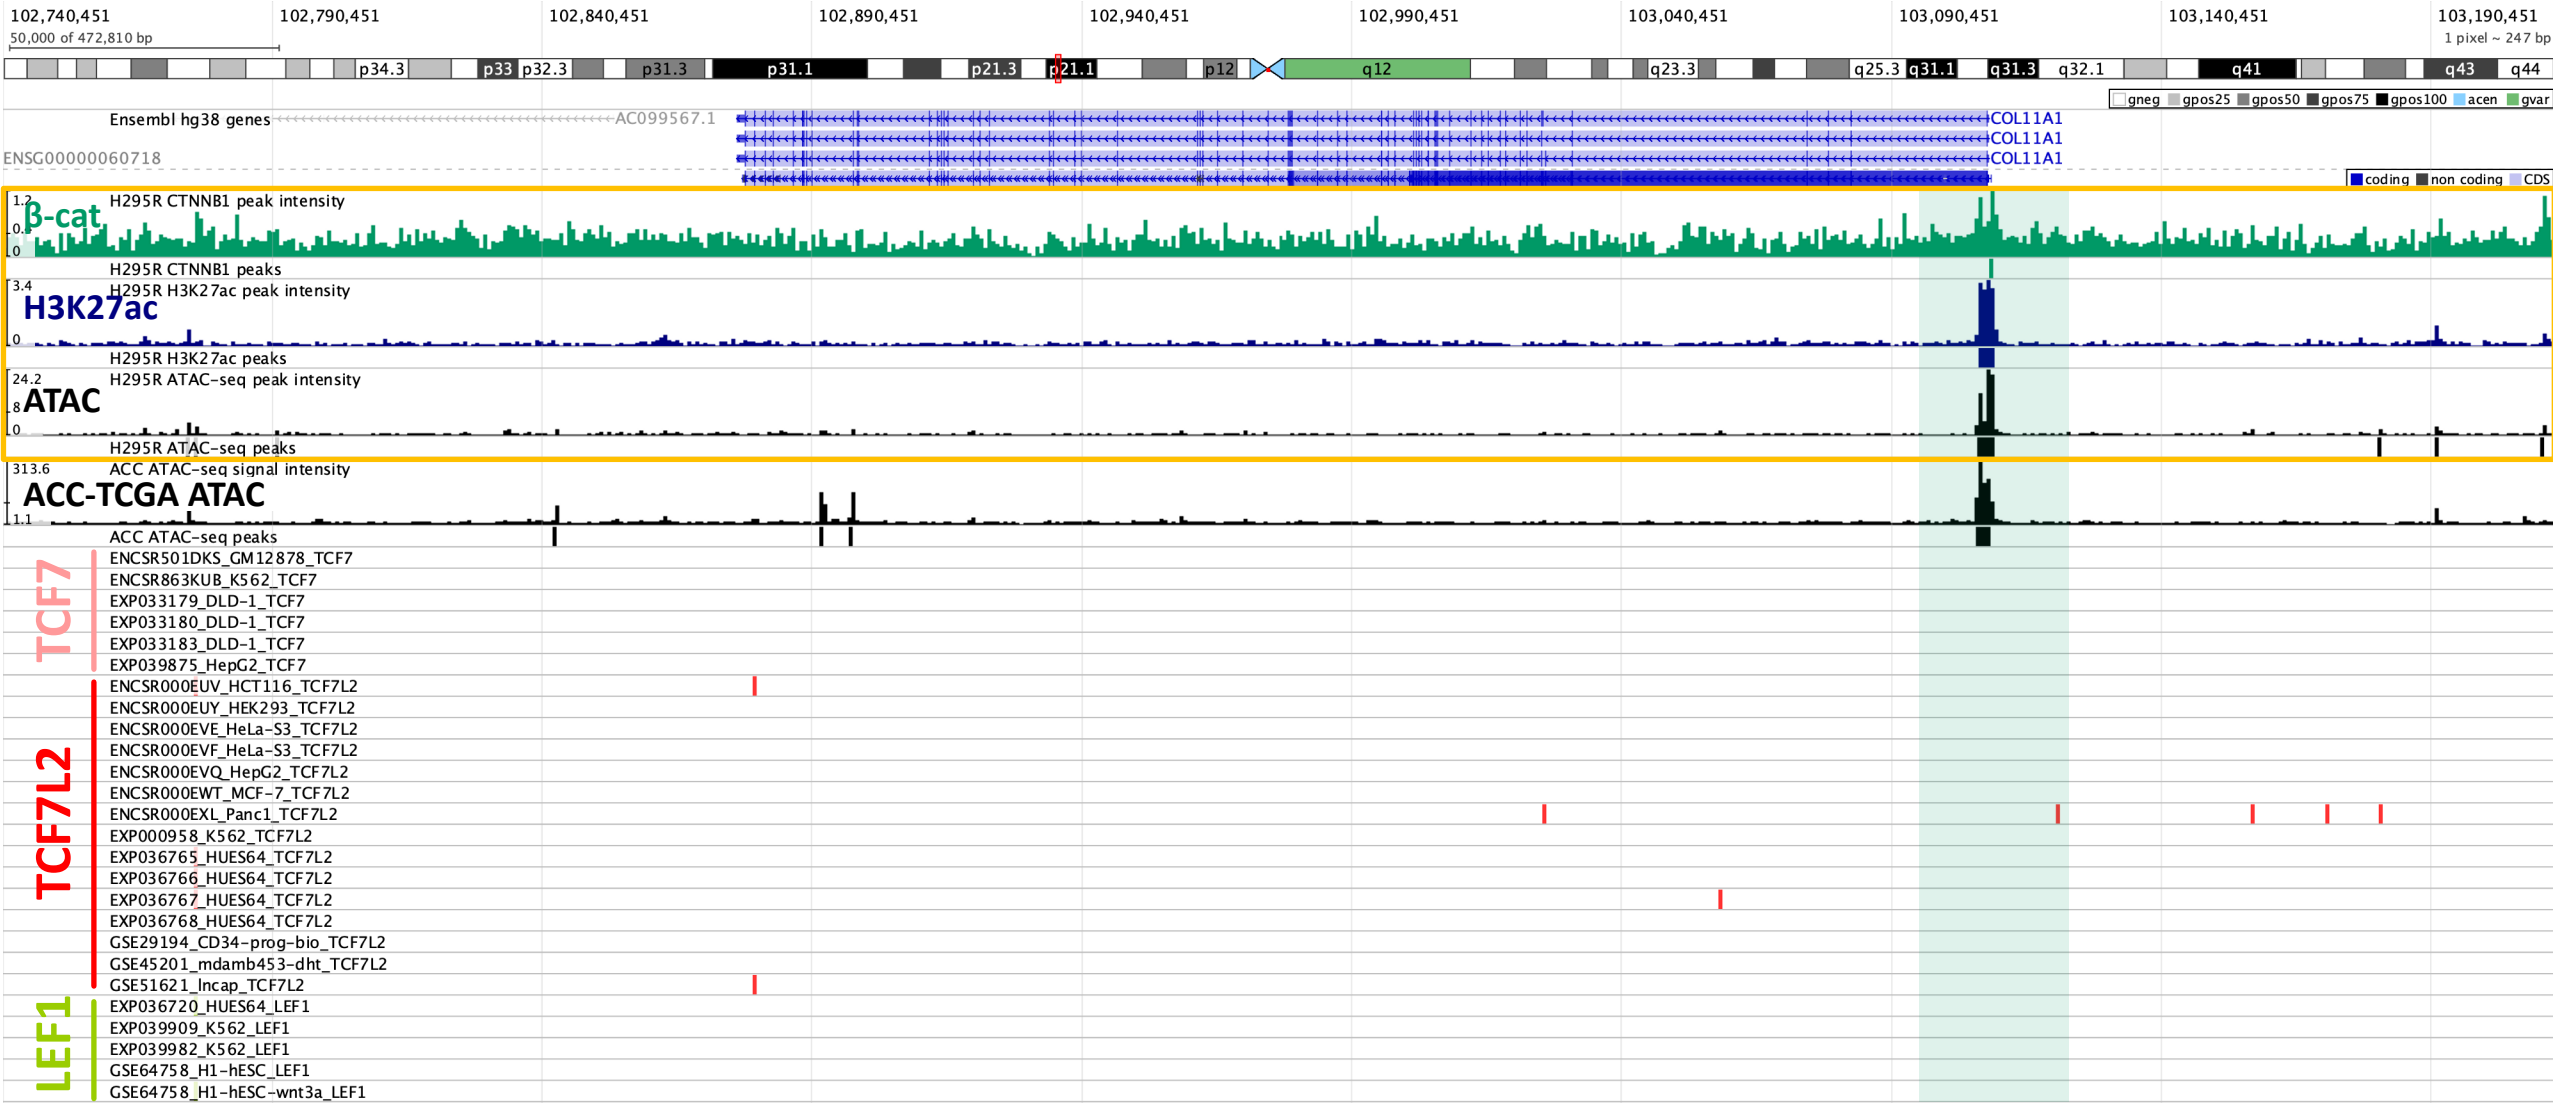



NCI-H295R

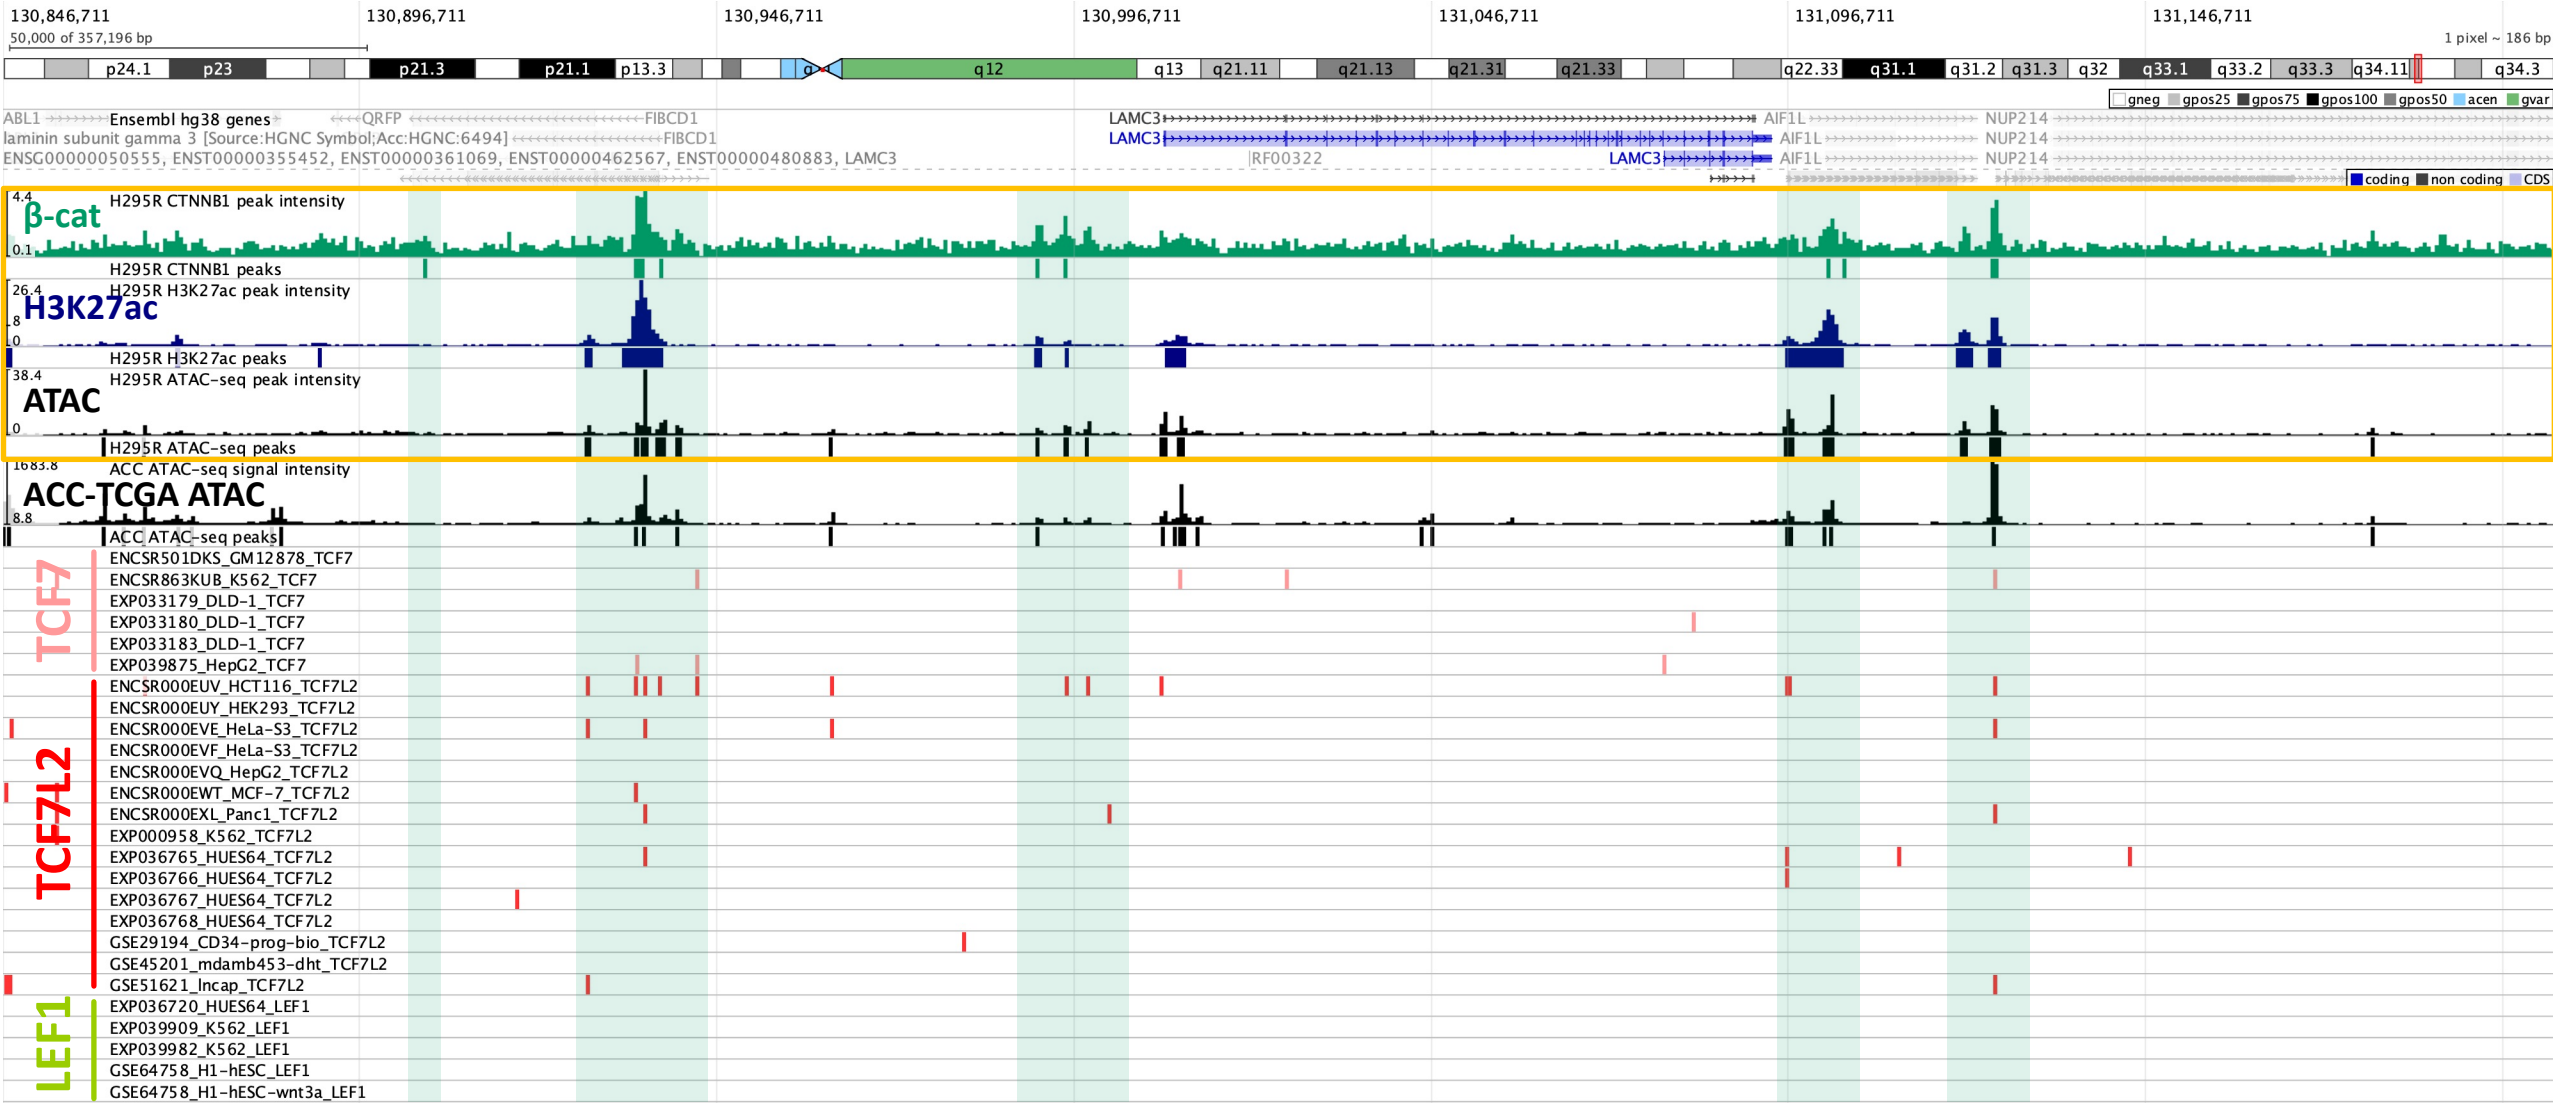

NCI-H295R

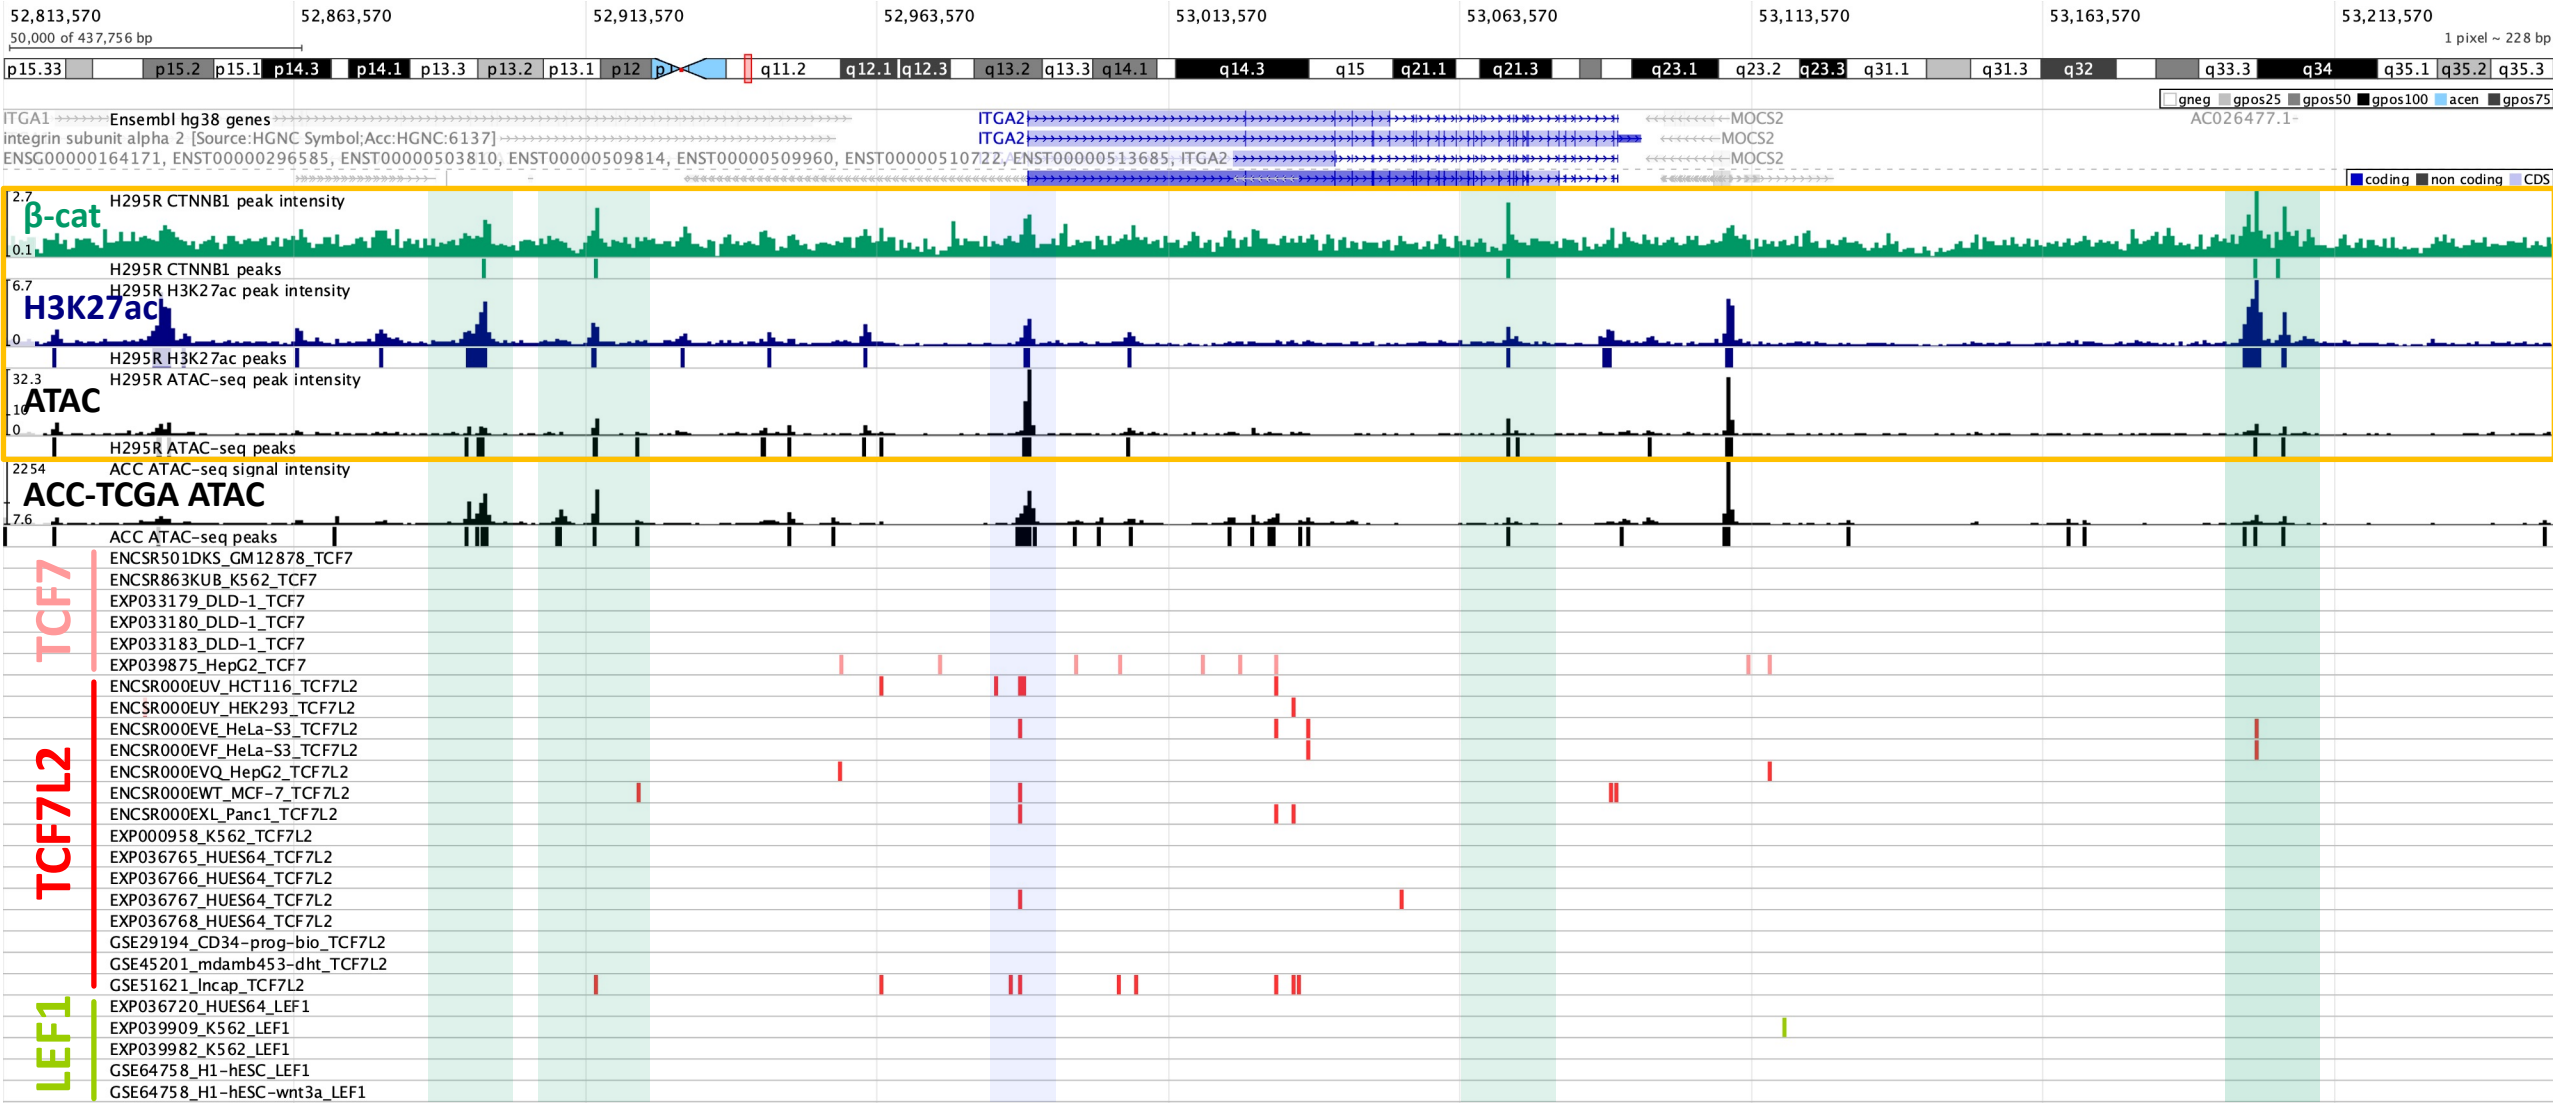

NCI-H295R

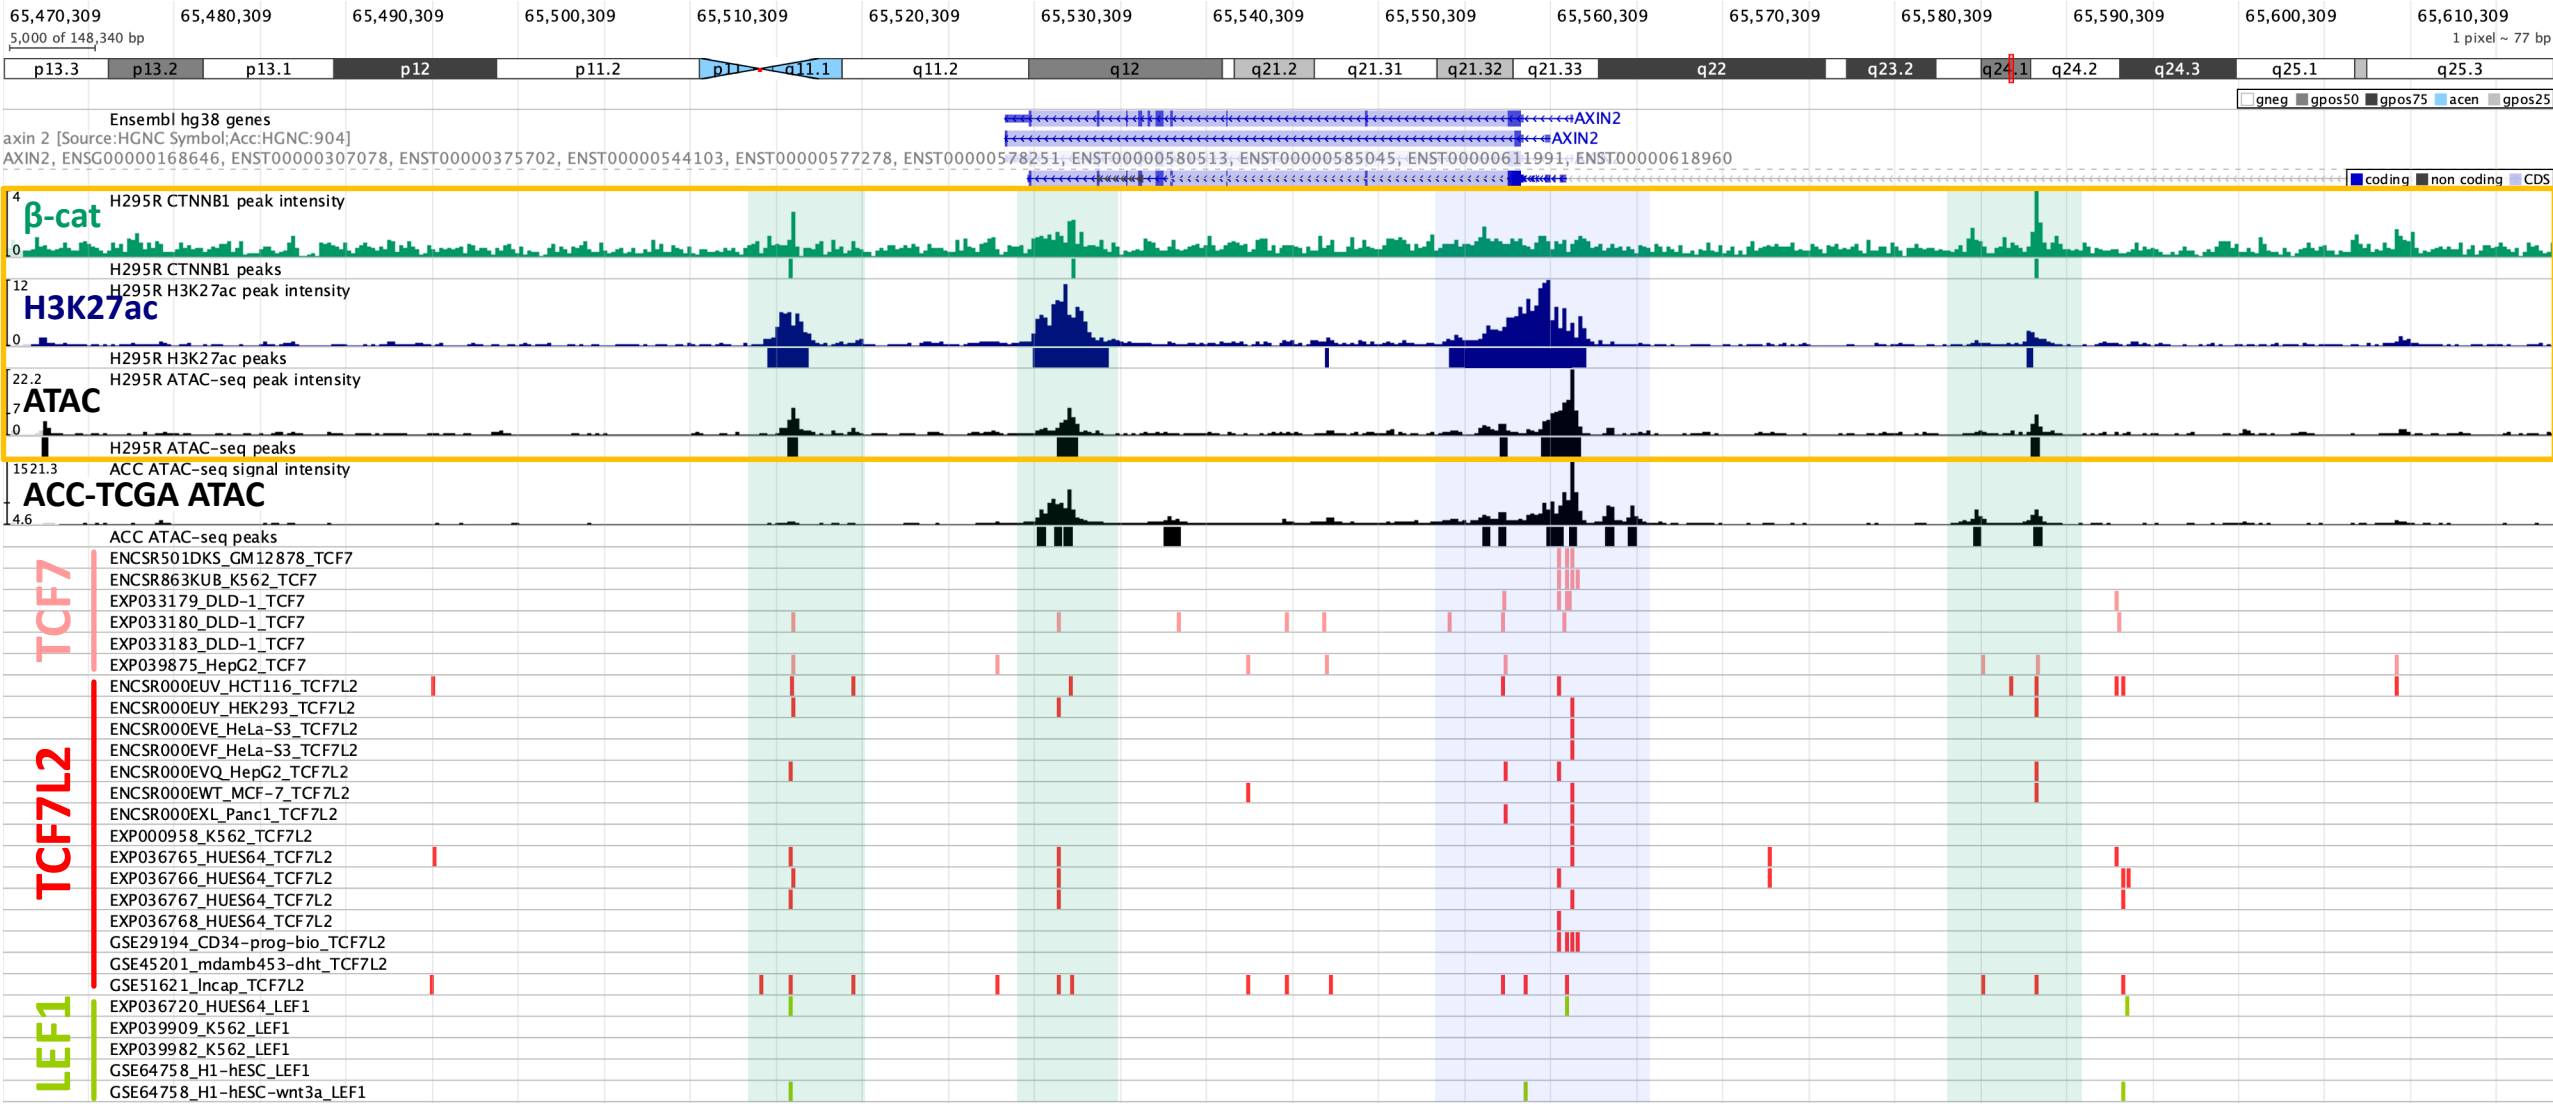

NCI-H295R

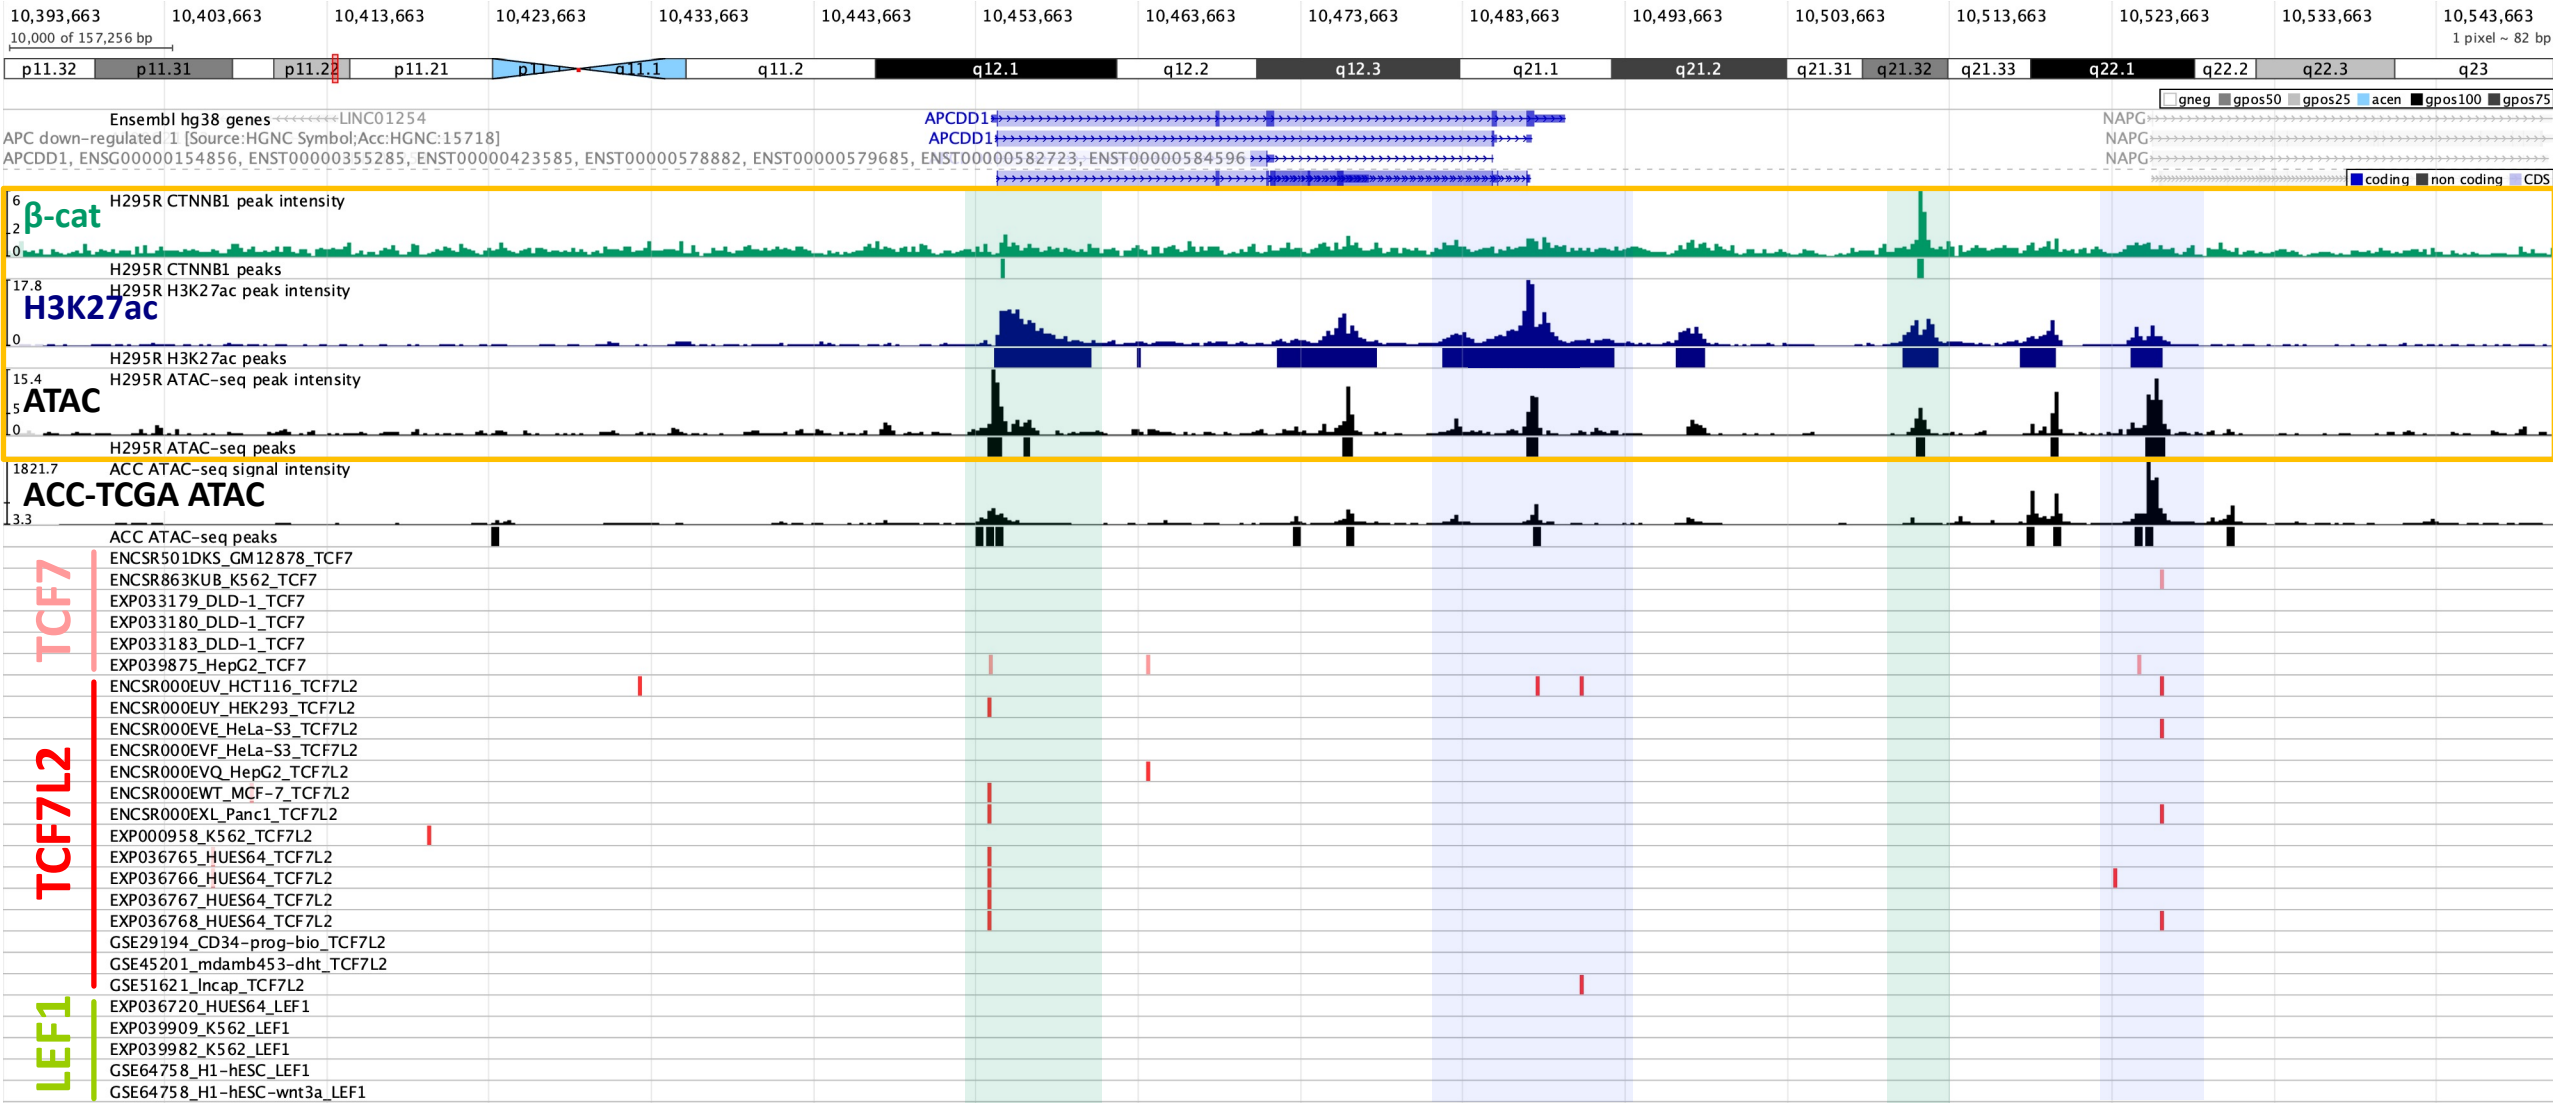



NCI-H295R

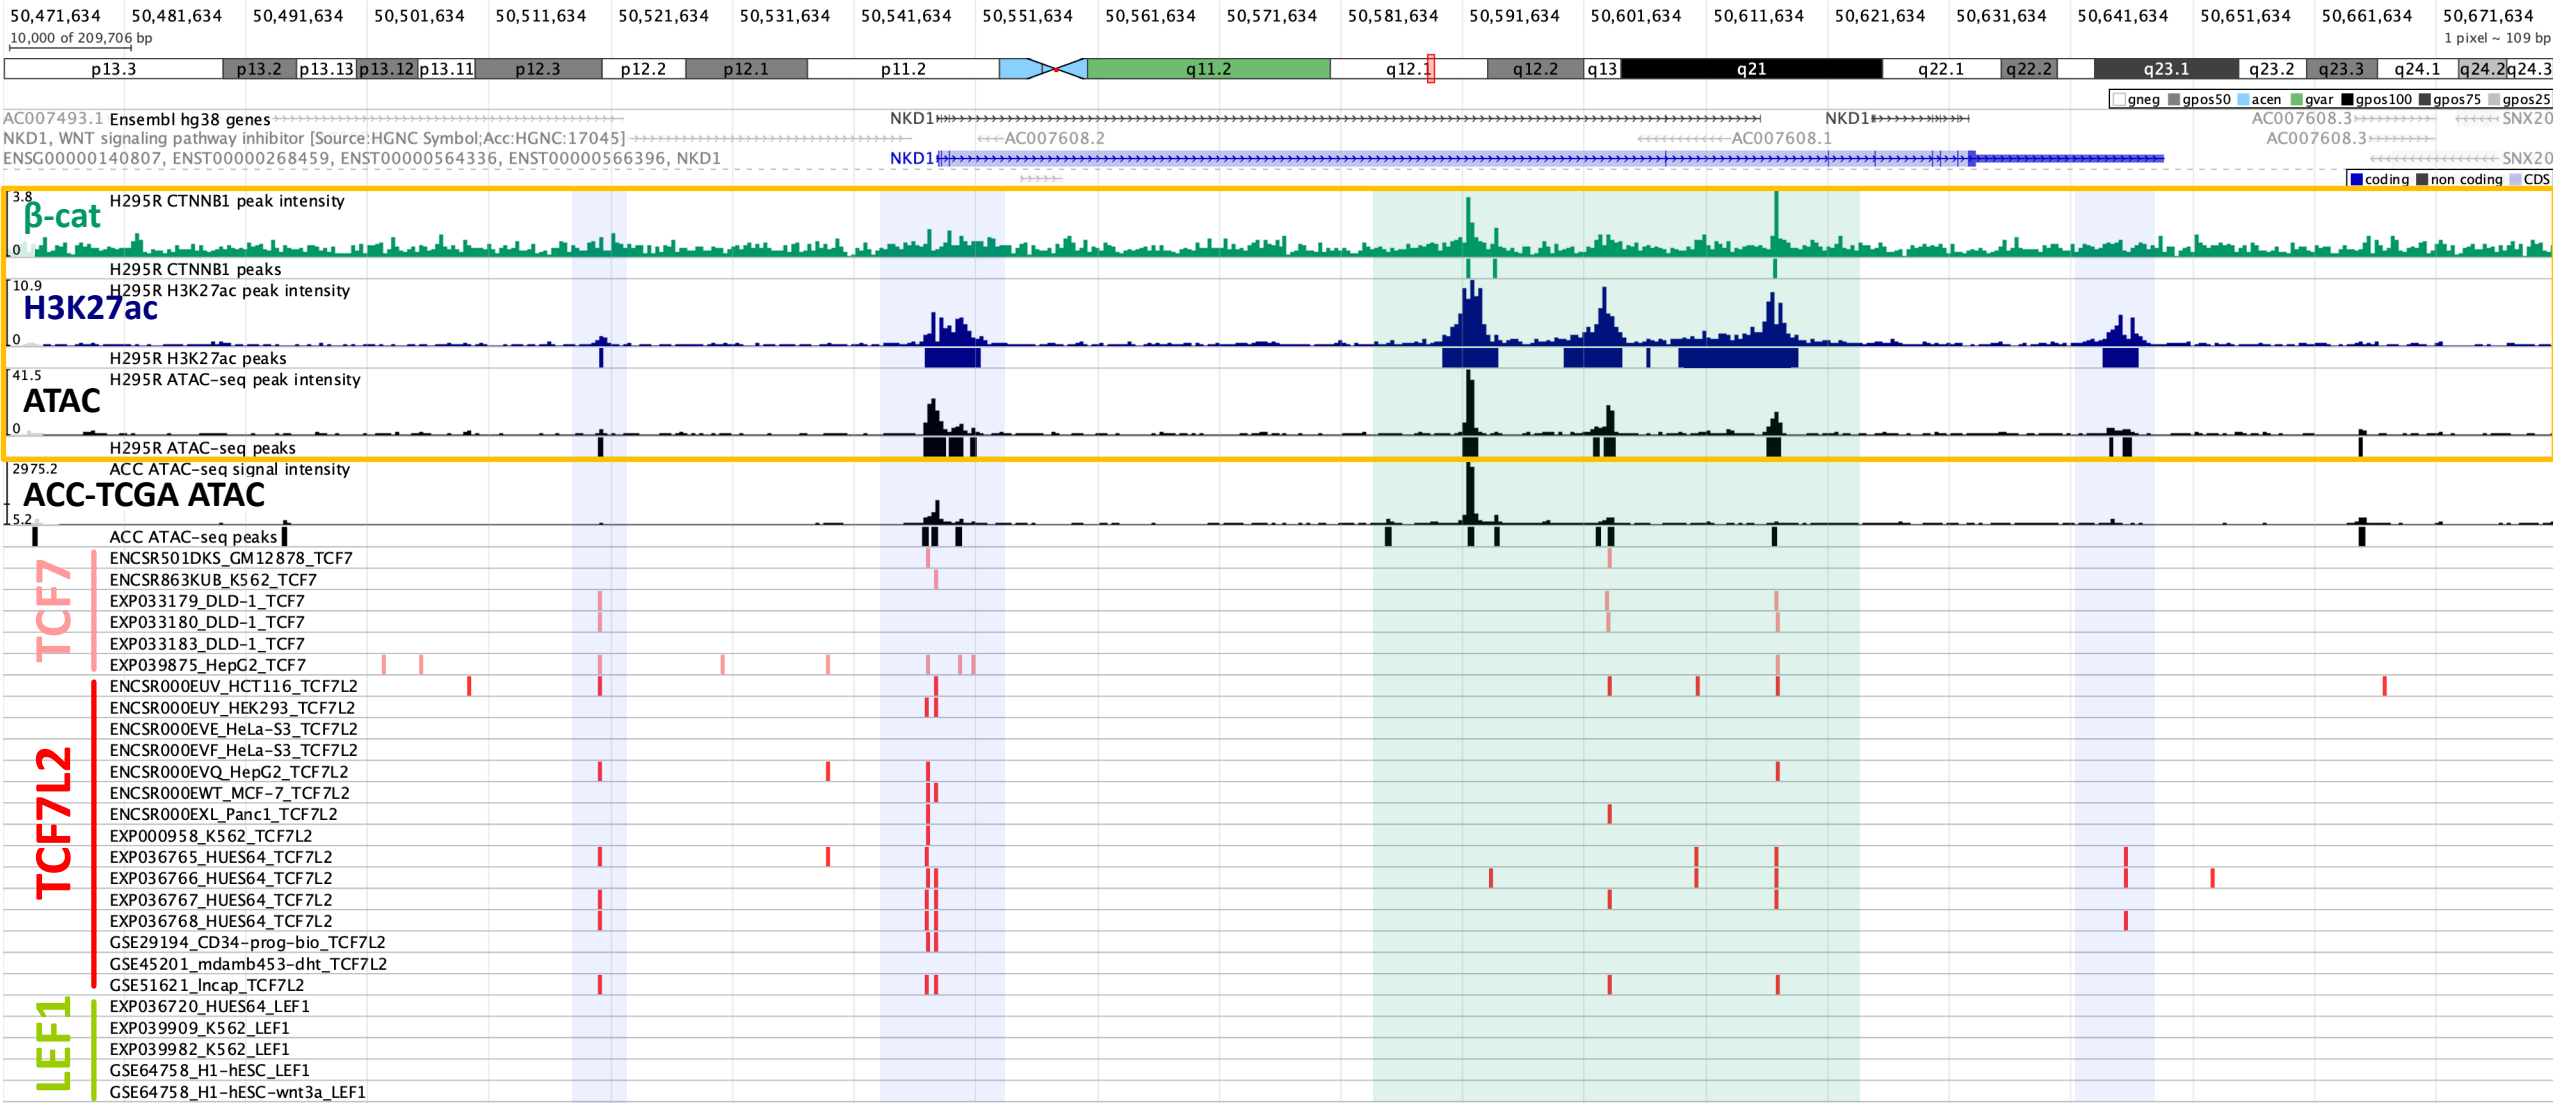

Supplement: s1 [file s1]

A.

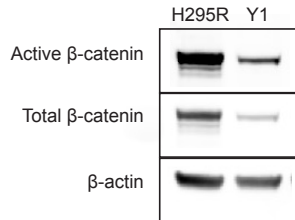

B.

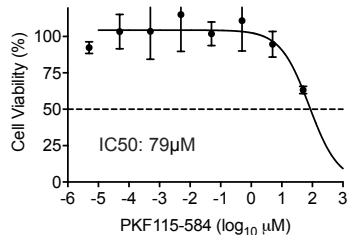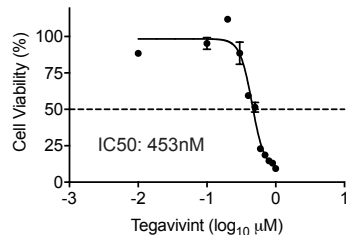

C.

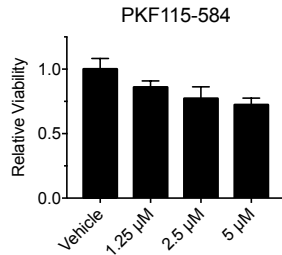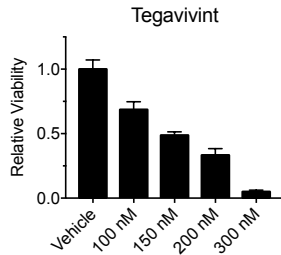

D.

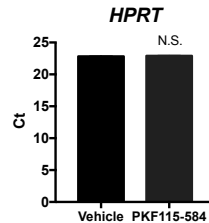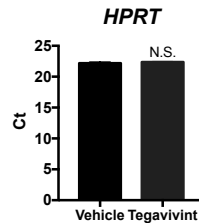

Supplement: s1 [file s1]
